# Supplementary material for: Cancer Biomarkers from Genome-Scale DNA Methylation: Comparison of Evolutionary and Semantic Analysis Methods
Source: Microarrays (Basel). 2015 Nov 27;4(4):647–70. doi: 10.3390/microarrays4040647 (PMC4996413; doi:10.3390/microarrays4040647)
Supplement: Supplementary File 1 [file microarrays-04-00647-s001.zip › microarrays-99114 Tables S10,S11.xlsx]

## Sheet: Table 10a
Enriched GO terms (Biological Process) and Genes resulting from GORevenge based Selection of CpG sites
Term/Gene Name	Annotation/Gene Description	Category/GeneID	P-value/Gene	Enrichment	Rank
GO:0048709	oligodendrocyte differentiation	P	5.525580e-13	9/21	1
ASCL1	achaete-scute family bHLH transcription factor 1	ENSG00000139352	ENSG00000139352
NKX2-1	NK2 homeobox 1	ENSG00000136352	ENSG00000136352
GLI3	GLI family zinc finger 3	ENSG00000106571	ENSG00000106571
SOX6	SRY (sex determining region Y)-box 6	ENSG00000110693	ENSG00000110693
SOX9	SRY (sex determining region Y)-box 9	ENSG00000125398	ENSG00000125398
SHH	sonic hedgehog	ENSG00000164690	ENSG00000164690
CSK	c-src tyrosine kinase	ENSG00000103653	ENSG00000103653
NKX6-2	NK6 homeobox 2	ENSG00000148826	ENSG00000148826
CDK5	cyclin-dependent kinase 5	ENSG00000164885	ENSG00000164885
GO:0044281	small molecule metabolic process	P	1.507239e-12	66/1530	2
NME1-NME2	NME1-NME2 readthrough	ENSG00000243678	ENSG00000243678
PFKFB1	6-phosphofructo-2-kinase/fructose-2,6-biphosphatase 1	ENSG00000158571	ENSG00000158571
SPHK2	sphingosine kinase 2	ENSG00000063176	ENSG00000063176
INS	insulin	ENSG00000254647	ENSG00000254647
ME1	malic enzyme 1, NADP(+)-dependent, cytosolic	ENSG00000065833	ENSG00000065833
MLXIPL	MLX interacting protein-like	ENSG00000009950	ENSG00000009950
PPAP2B	phosphatidic acid phosphatase type 2B	ENSG00000162407	ENSG00000162407
GART	phosphoribosylglycinamide formyltransferase, phosphoribosylglycinamide synthetase, phosphoribosylaminoimidazole synthetase	ENSG00000159131	ENSG00000159131
ACSL6	acyl-CoA synthetase long-chain family member 6	ENSG00000164398	ENSG00000164398
FBP1	fructose-1,6-bisphosphatase 1	ENSG00000165140	ENSG00000165140
PYGM	phosphorylase, glycogen, muscle	ENSG00000068976	ENSG00000068976
DCK	deoxycytidine kinase	ENSG00000156136	ENSG00000156136
PLD2	phospholipase D2	ENSG00000129219	ENSG00000129219
PSMB9	proteasome (prosome, macropain) subunit, beta type, 9	ENSG00000243594	ENSG00000243594
CHST11	carbohydrate (chondroitin 4) sulfotransferase 11	ENSG00000171310	ENSG00000171310
PSMD14	proteasome (prosome, macropain) 26S subunit, non-ATPase, 14	ENSG00000115233	ENSG00000115233
PSME3	proteasome (prosome, macropain) activator subunit 3 (PA28 gamma; Ki)	ENSG00000131467	ENSG00000131467
ALDH9A1	aldehyde dehydrogenase 9 family, member A1	ENSG00000143149	ENSG00000143149
GOT1	glutamic-oxaloacetic transaminase 1, soluble	ENSG00000120053	ENSG00000120053
HMOX1	heme oxygenase (decycling) 1	ENSG00000100292	ENSG00000100292
STAB2	stabilin 2	ENSG00000136011	ENSG00000136011
CYP1A1	cytochrome P450, family 1, subfamily A, polypeptide 1	ENSG00000140465	ENSG00000140465
FASN	fatty acid synthase	ENSG00000169710	ENSG00000169710
PLCG2	phospholipase C, gamma 2 (phosphatidylinositol-specific)	ENSG00000197943	ENSG00000197943
GOT2	glutamic-oxaloacetic transaminase 2, mitochondrial	ENSG00000125166	ENSG00000125166
PRKACB	protein kinase, cAMP-dependent, catalytic, beta	ENSG00000142875	ENSG00000142875
ALOX12	arachidonate 12-lipoxygenase	ENSG00000108839	ENSG00000108839
ITPR1	inositol 1,4,5-trisphosphate receptor, type 1	ENSG00000150995	ENSG00000150995
PSME2	proteasome (prosome, macropain) activator subunit 2 (PA28 beta)	ENSG00000100911	ENSG00000100911
TH	tyrosine hydroxylase	ENSG00000180176	ENSG00000180176
ASNS	asparagine synthetase (glutamine-hydrolyzing)	ENSG00000070669	ENSG00000070669
FADS1	fatty acid desaturase 1	ENSG00000149485	ENSG00000149485
CACNA1A	calcium channel, voltage-dependent, P/Q type, alpha 1A subunit	ENSG00000141837	ENSG00000141837
RAN	RAN, member RAS oncogene family	ENSG00000132341	ENSG00000132341
CBS	cystathionine-beta-synthase	ENSG00000160200	ENSG00000160200
EXT1	exostosin glycosyltransferase 1	ENSG00000182197	ENSG00000182197
ALB	albumin	ENSG00000163631	ENSG00000163631
APOC3	apolipoprotein C-III	ENSG00000110245	ENSG00000110245
AQP1	aquaporin 1 (Colton blood group)	ENSG00000240583	ENSG00000240583
SYNJ2	synaptojanin 2	ENSG00000078269	ENSG00000078269
PRKAR2B	protein kinase, cAMP-dependent, regulatory, type II, beta	ENSG00000005249	ENSG00000005249
PRKAR1B	protein kinase, cAMP-dependent, regulatory, type I, beta	ENSG00000188191	ENSG00000188191
GSS	glutathione synthetase	ENSG00000100983	ENSG00000100983
APOC2	apolipoprotein C-II	ENSG00000234906	ENSG00000234906
SDC1	syndecan 1	ENSG00000115884	ENSG00000115884
NME2	NME/NM23 nucleoside diphosphate kinase 2	ENSG00000011052	ENSG00000011052
UGT1A6	UDP glucuronosyltransferase 1 family, polypeptide A6	ENSG00000167165	ENSG00000167165
ENPP1	ectonucleotide pyrophosphatase/phosphodiesterase 1	ENSG00000197594	ENSG00000197594
TBL1XR1	transducin (beta)-like 1 X-linked receptor 1	ENSG00000177565	ENSG00000177565
SLC27A1	solute carrier family 27 (fatty acid transporter), member 1	ENSG00000130304	ENSG00000130304
UGT1A9	UDP glucuronosyltransferase 1 family, polypeptide A9	ENSG00000241119	ENSG00000241119
CREBBP	CREB binding protein	ENSG00000005339	ENSG00000005339
PSMB8	proteasome (prosome, macropain) subunit, beta type, 8	ENSG00000206298	ENSG00000206298
ADCY5	adenylate cyclase 5	ENSG00000173175	ENSG00000173175
PYGL	phosphorylase, glycogen, liver	ENSG00000100504	ENSG00000100504
PRKAG2	protein kinase, AMP-activated, gamma 2 non-catalytic subunit	ENSG00000106617	ENSG00000106617
ADCY3	adenylate cyclase 3	ENSG00000138031	ENSG00000138031
AKT1	v-akt murine thymoma viral oncogene homolog 1	ENSG00000142208	ENSG00000142208
PCK1	phosphoenolpyruvate carboxykinase 1 (soluble)	ENSG00000124253	ENSG00000124253
UGT1A4	UDP glucuronosyltransferase 1 family, polypeptide A4	ENSG00000244474	ENSG00000244474
CYP2C19	cytochrome P450, family 2, subfamily C, polypeptide 19	ENSG00000165841	ENSG00000165841
UGT1A8	UDP glucuronosyltransferase 1 family, polypeptide A8	ENSG00000241635	ENSG00000241635
SNAP25	synaptosomal-associated protein, 25kDa	ENSG00000132639	ENSG00000132639
PSMA3	proteasome (prosome, macropain) subunit, alpha type, 3	ENSG00000100567	ENSG00000100567
PLCG1	phospholipase C, gamma 1	ENSG00000124181	ENSG00000124181
RTEL1	regulator of telomere elongation helicase 1	ENSG00000258366	ENSG00000258366
GO:0003700	sequence-specific DNA binding transcription factor activity	F	1.592726e-12	70/1071	3
NME1-NME2	NME1-NME2 readthrough	ENSG00000243678	ENSG00000243678
TP73	tumor protein p73	ENSG00000078900	ENSG00000078900
RARG	retinoic acid receptor, gamma	ENSG00000172819	ENSG00000172819
PBX1	pre-B-cell leukemia homeobox 1	ENSG00000185630	ENSG00000185630
NKX2-5	NK2 homeobox 5	ENSG00000183072	ENSG00000183072
ZFHX3	zinc finger homeobox 3	ENSG00000140836	ENSG00000140836
FOXL1	forkhead box L1	ENSG00000176678	ENSG00000176678
MLXIPL	MLX interacting protein-like	ENSG00000009950	ENSG00000009950
CITED2	Cbp/p300-interacting transactivator, with Glu/Asp-rich carboxy-terminal domain, 2	ENSG00000164442	ENSG00000164442
MEF2C	myocyte enhancer factor 2C	ENSG00000081189	ENSG00000081189
NR2F2	nuclear receptor subfamily 2, group F, member 2	ENSG00000185551	ENSG00000185551
FOXD2	forkhead box D2	ENSG00000186564	ENSG00000186564
ASCL1	achaete-scute family bHLH transcription factor 1	ENSG00000139352	ENSG00000139352
SMAD6	SMAD family member 6	ENSG00000137834	ENSG00000137834
FOXM1	forkhead box M1	ENSG00000111206	ENSG00000111206
FOXD3	forkhead box D3	ENSG00000187140	ENSG00000187140
FOXA2	forkhead box A2	ENSG00000125798	ENSG00000125798
HES1	hes family bHLH transcription factor 1	ENSG00000114315	ENSG00000114315
DLX5	distal-less homeobox 5	ENSG00000105880	ENSG00000105880
RARA	retinoic acid receptor, alpha	ENSG00000131759	ENSG00000131759
HOXA11	homeobox A11	ENSG00000005073	ENSG00000005073
RXRG	retinoid X receptor, gamma	ENSG00000143171	ENSG00000143171
SMAD1	SMAD family member 1	ENSG00000170365	ENSG00000170365
TP63	tumor protein p63	ENSG00000073282	ENSG00000073282
WT1	Wilms tumor 1	ENSG00000184937	ENSG00000184937
FOXQ1	forkhead box Q1	ENSG00000164379	ENSG00000164379
BCL6	B-cell CLL/lymphoma 6	ENSG00000113916	ENSG00000113916
NKX2-1	NK2 homeobox 1	ENSG00000136352	ENSG00000136352
GLI3	GLI family zinc finger 3	ENSG00000106571	ENSG00000106571
TCF7L2	transcription factor 7-like 2 (T-cell specific, HMG-box)	ENSG00000148737	ENSG00000148737
NKX2-6	NK2 homeobox 6	ENSG00000180053	ENSG00000180053
MSX1	msh homeobox 1	ENSG00000163132	ENSG00000163132
SMAD3	SMAD family member 3	ENSG00000166949	ENSG00000166949
SOX6	SRY (sex determining region Y)-box 6	ENSG00000110693	ENSG00000110693
PDX1	pancreatic and duodenal homeobox 1	ENSG00000139515	ENSG00000139515
TBX5	T-box 5	ENSG00000089225	ENSG00000089225
ATF4	activating transcription factor 4	ENSG00000128272	ENSG00000128272
RNF4	ring finger protein 4	ENSG00000063978	ENSG00000063978
SOX9	SRY (sex determining region Y)-box 9	ENSG00000125398	ENSG00000125398
NR2F1	nuclear receptor subfamily 2, group F, member 1	ENSG00000175745	ENSG00000175745
FOXP1	forkhead box P1	ENSG00000114861	ENSG00000114861
ID3	inhibitor of DNA binding 3, dominant negative helix-loop-helix protein	ENSG00000117318	ENSG00000117318
IRF4	interferon regulatory factor 4	ENSG00000137265	ENSG00000137265
FOXI2	forkhead box I2	ENSG00000186766	ENSG00000186766
GLI2	GLI family zinc finger 2	ENSG00000074047	ENSG00000074047
FOXK1	forkhead box K1	ENSG00000164916	ENSG00000164916
IKZF1	IKAROS family zinc finger 1 (Ikaros)	ENSG00000185811	ENSG00000185811
TSHZ3	teashirt zinc finger homeobox 3	ENSG00000121297	ENSG00000121297
HNF1B	HNF1 homeobox B	ENSG00000108753	ENSG00000108753
AR	androgen receptor	ENSG00000169083	ENSG00000169083
GATA4	GATA binding protein 4	ENSG00000136574	ENSG00000136574
CEBPA	CCAAT/enhancer binding protein (C/EBP), alpha	ENSG00000245848	ENSG00000245848
FOXE3	forkhead box E3	ENSG00000186790	ENSG00000186790
NME2	NME/NM23 nucleoside diphosphate kinase 2	ENSG00000011052	ENSG00000011052
MYOD1	myogenic differentiation 1	ENSG00000129152	ENSG00000129152
NOTCH1	notch 1	ENSG00000148400	ENSG00000148400
NR5A2	nuclear receptor subfamily 5, group A, member 2	ENSG00000116833	ENSG00000116833
SALL1	spalt-like transcription factor 1	ENSG00000103449	ENSG00000103449
TBX3	T-box 3	ENSG00000135111	ENSG00000135111
CREBBP	CREB binding protein	ENSG00000005339	ENSG00000005339
HNF1A	HNF1 homeobox A	ENSG00000135100	ENSG00000135100
FOXD4L1	forkhead box D4-like 1	ENSG00000184492	ENSG00000184492
FOXO1	forkhead box O1	ENSG00000150907	ENSG00000150907
THRB	thyroid hormone receptor, beta	ENSG00000151090	ENSG00000151090
HR	hair growth associated	ENSG00000168453	ENSG00000168453
MESP1	mesoderm posterior 1 homolog (mouse)	ENSG00000166823	ENSG00000166823
FOXP2	forkhead box P2	ENSG00000128573	ENSG00000128573
NKX6-2	NK6 homeobox 2	ENSG00000148826	ENSG00000148826
USF2	upstream transcription factor 2, c-fos interacting	ENSG00000105698	ENSG00000105698
FOXA1	forkhead box A1	ENSG00000129514	ENSG00000129514
GO:0015020	glucuronosyltransferase activity	F	1.677103e-12	9/28	4
UGT1A3	UDP glucuronosyltransferase 1 family, polypeptide A3	ENSG00000243135	ENSG00000243135
UGT1A5	UDP glucuronosyltransferase 1 family, polypeptide A5	ENSG00000240224	ENSG00000240224
EXT1	exostosin glycosyltransferase 1	ENSG00000182197	ENSG00000182197
UGT1A10	UDP glucuronosyltransferase 1 family, polypeptide A10	ENSG00000242515	ENSG00000242515
UGT1A6	UDP glucuronosyltransferase 1 family, polypeptide A6	ENSG00000167165	ENSG00000167165
UGT1A7	UDP glucuronosyltransferase 1 family, polypeptide A7	ENSG00000244122	ENSG00000244122
UGT1A9	UDP glucuronosyltransferase 1 family, polypeptide A9	ENSG00000241119	ENSG00000241119
UGT1A4	UDP glucuronosyltransferase 1 family, polypeptide A4	ENSG00000244474	ENSG00000244474
UGT1A8	UDP glucuronosyltransferase 1 family, polypeptide A8	ENSG00000241635	ENSG00000241635
GO:0007411	axon guidance	P	1.925571e-12	29/345	5
ROBO2	roundabout, axon guidance receptor, homolog 2 (Drosophila)	ENSG00000185008	ENSG00000185008
TGFB2	transforming growth factor, beta 2	ENSG00000092969	ENSG00000092969
VAV2	vav 2 guanine nucleotide exchange factor	ENSG00000160293	ENSG00000160293
NTF3	neurotrophin 3	ENSG00000185652	ENSG00000185652
FYN	FYN oncogene related to SRC, FGR, YES	ENSG00000010810	ENSG00000010810
DLX5	distal-less homeobox 5	ENSG00000105880	ENSG00000105880
FGFR1	fibroblast growth factor receptor 1	ENSG00000077782	ENSG00000077782
NKX2-1	NK2 homeobox 1	ENSG00000136352	ENSG00000136352
GLI3	GLI family zinc finger 3	ENSG00000106571	ENSG00000106571
NTRK1	neurotrophic tyrosine kinase, receptor, type 1	ENSG00000198400	ENSG00000198400
CACNB4	calcium channel, voltage-dependent, beta 4 subunit	ENSG00000182389	ENSG00000182389
SLIT3	slit homolog 3 (Drosophila)	ENSG00000184347	ENSG00000184347
NRP1	neuropilin 1	ENSG00000099250	ENSG00000099250
EPHB1	EPH receptor B1	ENSG00000154928	ENSG00000154928
GLI2	GLI family zinc finger 2	ENSG00000074047	ENSG00000074047
EXT1	exostosin glycosyltransferase 1	ENSG00000182197	ENSG00000182197
GRB2	growth factor receptor-bound protein 2	ENSG00000177885	ENSG00000177885
RPS6KA2	ribosomal protein S6 kinase, 90kDa, polypeptide 2	ENSG00000071242	ENSG00000071242
BMP7	bone morphogenetic protein 7	ENSG00000101144	ENSG00000101144
DPYSL2	dihydropyrimidinase-like 2	ENSG00000092964	ENSG00000092964
PAK2	p21 protein (Cdc42/Rac)-activated kinase 2	ENSG00000180370	ENSG00000180370
SHH	sonic hedgehog	ENSG00000164690	ENSG00000164690
BDNF	brain-derived neurotrophic factor	ENSG00000176697	ENSG00000176697
RELN	reelin	ENSG00000189056	ENSG00000189056
EPHB2	EPH receptor B2	ENSG00000133216	ENSG00000133216
GDNF	glial cell derived neurotrophic factor	ENSG00000168621	ENSG00000168621
PLCG1	phospholipase C, gamma 1	ENSG00000124181	ENSG00000124181
CDK5	cyclin-dependent kinase 5	ENSG00000164885	ENSG00000164885
PTK2	protein tyrosine kinase 2	ENSG00000169398	ENSG00000169398
GO:0046777	protein amino acid autophosphorylation	P	1.936673e-12	21/171	6
MAP3K3	mitogen-activated protein kinase kinase kinase 3	ENSG00000198909	ENSG00000198909
IGF1R	insulin-like growth factor 1 receptor	ENSG00000140443	ENSG00000140443
STK4	serine/threonine kinase 4	ENSG00000101109	ENSG00000101109
DYRK1A	dual-specificity tyrosine-(Y)-phosphorylation regulated kinase 1A	ENSG00000157540	ENSG00000157540
INSR	insulin receptor	ENSG00000171105	ENSG00000171105
FYN	FYN oncogene related to SRC, FGR, YES	ENSG00000010810	ENSG00000010810
KDR	kinase insert domain receptor (a type III receptor tyrosine kinase)	ENSG00000128052	ENSG00000128052
FGFR1	fibroblast growth factor receptor 1	ENSG00000077782	ENSG00000077782
MAPK15	mitogen-activated protein kinase 15	ENSG00000181085	ENSG00000181085
FGFR4	fibroblast growth factor receptor 4	ENSG00000160867	ENSG00000160867
NTRK1	neurotrophic tyrosine kinase, receptor, type 1	ENSG00000198400	ENSG00000198400
EPHB1	EPH receptor B1	ENSG00000154928	ENSG00000154928
FGFR2	fibroblast growth factor receptor 2	ENSG00000066468	ENSG00000066468
ATM	ataxia telangiectasia mutated	ENSG00000149311	ENSG00000149311
PDGFRB	platelet-derived growth factor receptor, beta polypeptide	ENSG00000113721	ENSG00000113721
PAK2	p21 protein (Cdc42/Rac)-activated kinase 2	ENSG00000180370	ENSG00000180370
CSK	c-src tyrosine kinase	ENSG00000103653	ENSG00000103653
AKT1	v-akt murine thymoma viral oncogene homolog 1	ENSG00000142208	ENSG00000142208
PDGFRA	platelet-derived growth factor receptor, alpha polypeptide	ENSG00000134853	ENSG00000134853
CDK5	cyclin-dependent kinase 5	ENSG00000164885	ENSG00000164885
PTK2	protein tyrosine kinase 2	ENSG00000169398	ENSG00000169398
GO:0051216	cartilage development	P	3.583911e-12	14/90	7
WNT7A	wingless-type MMTV integration site family, member 7A	ENSG00000154764	ENSG00000154764
FOXD2	forkhead box D2	ENSG00000186564	ENSG00000186564
FOXD3	forkhead box D3	ENSG00000187140	ENSG00000187140
CHST11	carbohydrate (chondroitin 4) sulfotransferase 11	ENSG00000171310	ENSG00000171310
SMAD1	SMAD family member 1	ENSG00000170365	ENSG00000170365
MSX1	msh homeobox 1	ENSG00000163132	ENSG00000163132
SOX6	SRY (sex determining region Y)-box 6	ENSG00000110693	ENSG00000110693
SOX9	SRY (sex determining region Y)-box 9	ENSG00000125398	ENSG00000125398
BMP7	bone morphogenetic protein 7	ENSG00000101144	ENSG00000101144
BMPR1A	bone morphogenetic protein receptor, type IA	ENSG00000107779	ENSG00000107779
GHRL	ghrelin/obestatin prepropeptide	ENSG00000157017	ENSG00000157017
BMP6	bone morphogenetic protein 6	ENSG00000153162	ENSG00000153162
FOXD4L1	forkhead box D4-like 1	ENSG00000184492	ENSG00000184492
MKKS	McKusick-Kaufman syndrome	ENSG00000125863	ENSG00000125863
GO:0030900	forebrain development	P	3.862799e-12	15/87	8
TP73	tumor protein p73	ENSG00000078900	ENSG00000078900
NR2F2	nuclear receptor subfamily 2, group F, member 2	ENSG00000185551	ENSG00000185551
FYN	FYN oncogene related to SRC, FGR, YES	ENSG00000010810	ENSG00000010810
KDM2B	lysine (K)-specific demethylase 2B	ENSG00000089094	ENSG00000089094
NKX2-1	NK2 homeobox 1	ENSG00000136352	ENSG00000136352
GLI3	GLI family zinc finger 3	ENSG00000106571	ENSG00000106571
MSX1	msh homeobox 1	ENSG00000163132	ENSG00000163132
NR2F1	nuclear receptor subfamily 2, group F, member 1	ENSG00000175745	ENSG00000175745
GNAO1	guanine nucleotide binding protein (G protein), alpha activating activity polypeptide O	ENSG00000087258	ENSG00000087258
IKZF1	IKAROS family zinc finger 1 (Ikaros)	ENSG00000185811	ENSG00000185811
NOTCH1	notch 1	ENSG00000148400	ENSG00000148400
SHH	sonic hedgehog	ENSG00000164690	ENSG00000164690
DRD2	dopamine receptor D2	ENSG00000149295	ENSG00000149295
RELN	reelin	ENSG00000189056	ENSG00000189056
CDK5	cyclin-dependent kinase 5	ENSG00000164885	ENSG00000164885
GO:0009790	embryo development	P	3.978262e-12	24/154	9
NRG1	neuregulin 1	ENSG00000157168	ENSG00000157168
TGFB2	transforming growth factor, beta 2	ENSG00000092969	ENSG00000092969
LAMA5	laminin, alpha 5	ENSG00000130702	ENSG00000130702
FOXL1	forkhead box L1	ENSG00000176678	ENSG00000176678
HTT	huntingtin	ENSG00000197386	ENSG00000197386
FOXD2	forkhead box D2	ENSG00000186564	ENSG00000186564
FOXM1	forkhead box M1	ENSG00000111206	ENSG00000111206
SFRP4	secreted frizzled-related protein 4	ENSG00000106483	ENSG00000106483
SFRP1	secreted frizzled-related protein 1	ENSG00000104332	ENSG00000104332
FOXQ1	forkhead box Q1	ENSG00000164379	ENSG00000164379
PDPN	podoplanin	ENSG00000162493	ENSG00000162493
FOXP1	forkhead box P1	ENSG00000114861	ENSG00000114861
FOXI2	forkhead box I2	ENSG00000186766	ENSG00000186766
FOXK1	forkhead box K1	ENSG00000164916	ENSG00000164916
FZD4	frizzled family receptor 4	ENSG00000174804	ENSG00000174804
NR5A2	nuclear receptor subfamily 5, group A, member 2	ENSG00000116833	ENSG00000116833
SHH	sonic hedgehog	ENSG00000164690	ENSG00000164690
FOXD4L1	forkhead box D4-like 1	ENSG00000184492	ENSG00000184492
FZD10	frizzled family receptor 10	ENSG00000111432	ENSG00000111432
FOXO1	forkhead box O1	ENSG00000150907	ENSG00000150907
FOXP2	forkhead box P2	ENSG00000128573	ENSG00000128573
FOXA1	forkhead box A1	ENSG00000129514	ENSG00000129514
CDK5	cyclin-dependent kinase 5	ENSG00000164885	ENSG00000164885
PTK2	protein tyrosine kinase 2	ENSG00000169398	ENSG00000169398
GO:0007420	brain development	P	4.829026e-12	27/225	10
CADM1	cell adhesion molecule 1	ENSG00000182985	ENSG00000182985
ROBO2	roundabout, axon guidance receptor, homolog 2 (Drosophila)	ENSG00000185008	ENSG00000185008
SPHK2	sphingosine kinase 2	ENSG00000063176	ENSG00000063176
ZFHX3	zinc finger homeobox 3	ENSG00000140836	ENSG00000140836
FOXL1	forkhead box L1	ENSG00000176678	ENSG00000176678
IGF1R	insulin-like growth factor 1 receptor	ENSG00000140443	ENSG00000140443
HTT	huntingtin	ENSG00000197386	ENSG00000197386
NTF3	neurotrophin 3	ENSG00000185652	ENSG00000185652
FRZB	frizzled-related protein	ENSG00000162998	ENSG00000162998
SFRP4	secreted frizzled-related protein 4	ENSG00000106483	ENSG00000106483
SFRP1	secreted frizzled-related protein 1	ENSG00000104332	ENSG00000104332
FGFR1	fibroblast growth factor receptor 1	ENSG00000077782	ENSG00000077782
NKX2-1	NK2 homeobox 1	ENSG00000136352	ENSG00000136352
GLI3	GLI family zinc finger 3	ENSG00000106571	ENSG00000106571
SRR	serine racemase	ENSG00000167720	ENSG00000167720
TCF7L2	transcription factor 7-like 2 (T-cell specific, HMG-box)	ENSG00000148737	ENSG00000148737
EXT1	exostosin glycosyltransferase 1	ENSG00000182197	ENSG00000182197
NODAL	nodal growth differentiation factor	ENSG00000156574	ENSG00000156574
ATM	ataxia telangiectasia mutated	ENSG00000149311	ENSG00000149311
DPYSL2	dihydropyrimidinase-like 2	ENSG00000092964	ENSG00000092964
BCL2L11	BCL2-like 11 (apoptosis facilitator)	ENSG00000153094	ENSG00000153094
FZD4	frizzled family receptor 4	ENSG00000174804	ENSG00000174804
MAP1S	microtubule-associated protein 1S	ENSG00000130479	ENSG00000130479
CSK	c-src tyrosine kinase	ENSG00000103653	ENSG00000103653
FZD10	frizzled family receptor 10	ENSG00000111432	ENSG00000111432
RELN	reelin	ENSG00000189056	ENSG00000189056
EPHA7	EPH receptor A7	ENSG00000135333	ENSG00000135333
GO:0001701	in utero embryonic development	P	5.751399e-12	36/256	11
WNT7B	wingless-type MMTV integration site family, member 7B	ENSG00000188064	ENSG00000188064
CITED2	Cbp/p300-interacting transactivator, with Glu/Asp-rich carboxy-terminal domain, 2	ENSG00000164442	ENSG00000164442
NR2F2	nuclear receptor subfamily 2, group F, member 2	ENSG00000185551	ENSG00000185551
EDNRA	endothelin receptor type A	ENSG00000151617	ENSG00000151617
HCN4	hyperpolarization activated cyclic nucleotide-gated potassium channel 4	ENSG00000138622	ENSG00000138622
NOTCH2	notch 2	ENSG00000134250	ENSG00000134250
FOXD3	forkhead box D3	ENSG00000187140	ENSG00000187140
FOXA2	forkhead box A2	ENSG00000125798	ENSG00000125798
HES1	hes family bHLH transcription factor 1	ENSG00000114315	ENSG00000114315
CDH1	cadherin 1, type 1, E-cadherin (epithelial)	ENSG00000039068	ENSG00000039068
AXIN1	axin 1	ENSG00000103126	ENSG00000103126
FGFR1	fibroblast growth factor receptor 1	ENSG00000077782	ENSG00000077782
HAND1	heart and neural crest derivatives expressed 1	ENSG00000113196	ENSG00000113196
GLI3	GLI family zinc finger 3	ENSG00000106571	ENSG00000106571
MSX1	msh homeobox 1	ENSG00000163132	ENSG00000163132
SMAD3	SMAD family member 3	ENSG00000166949	ENSG00000166949
SOX6	SRY (sex determining region Y)-box 6	ENSG00000110693	ENSG00000110693
JAG2	jagged 2	ENSG00000184916	ENSG00000184916
FOXP1	forkhead box P1	ENSG00000114861	ENSG00000114861
GLI2	GLI family zinc finger 2	ENSG00000074047	ENSG00000074047
ACVRL1	activin A receptor type II-like 1	ENSG00000139567	ENSG00000139567
FGFR2	fibroblast growth factor receptor 2	ENSG00000066468	ENSG00000066468
NODAL	nodal growth differentiation factor	ENSG00000156574	ENSG00000156574
TSHZ3	teashirt zinc finger homeobox 3	ENSG00000121297	ENSG00000121297
AR	androgen receptor	ENSG00000169083	ENSG00000169083
BMPR1A	bone morphogenetic protein receptor, type IA	ENSG00000107779	ENSG00000107779
GATA4	GATA binding protein 4	ENSG00000136574	ENSG00000136574
BCL2L11	BCL2-like 11 (apoptosis facilitator)	ENSG00000153094	ENSG00000153094
PDGFRB	platelet-derived growth factor receptor, beta polypeptide	ENSG00000113721	ENSG00000113721
NOTCH1	notch 1	ENSG00000148400	ENSG00000148400
TBX3	T-box 3	ENSG00000135111	ENSG00000135111
XRCC4	X-ray repair complementing defective repair in Chinese hamster cells 4	ENSG00000152422	ENSG00000152422
RPA1	replication protein A1, 70kDa	ENSG00000132383	ENSG00000132383
PDGFRA	platelet-derived growth factor receptor, alpha polypeptide	ENSG00000134853	ENSG00000134853
PLCG1	phospholipase C, gamma 1	ENSG00000124181	ENSG00000124181
DDX5	DEAD (Asp-Glu-Ala-Asp) box helicase 5	ENSG00000263077	ENSG00000263077
GO:0048011	nerve growth factor receptor signaling pathway	P	5.891954e-12	36/286	12
NRG1	neuregulin 1	ENSG00000157168	ENSG00000157168
IKBKB	inhibitor of kappa light polypeptide gene enhancer in B-cells, kinase beta	ENSG00000104365	ENSG00000104365
BRAF	v-raf murine sarcoma viral oncogene homolog B	ENSG00000157764	ENSG00000157764
ERBB3	v-erb-b2 avian erythroblastic leukemia viral oncogene homolog 3	ENSG00000065361	ENSG00000065361
CDKN1B	cyclin-dependent kinase inhibitor 1B (p27, Kip1)	ENSG00000111276	ENSG00000111276
BCAR1	breast cancer anti-estrogen resistance 1	ENSG00000050820	ENSG00000050820
KALRN	kalirin, RhoGEF kinase	ENSG00000160145	ENSG00000160145
MEF2C	myocyte enhancer factor 2C	ENSG00000081189	ENSG00000081189
VAV2	vav 2 guanine nucleotide exchange factor	ENSG00000160293	ENSG00000160293
FYN	FYN oncogene related to SRC, FGR, YES	ENSG00000010810	ENSG00000010810
NFKBIA	nuclear factor of kappa light polypeptide gene enhancer in B-cells inhibitor, alpha	ENSG00000100906	ENSG00000100906
ARHGEF2	Rho/Rac guanine nucleotide exchange factor (GEF) 2	ENSG00000116584	ENSG00000116584
FGFR1	fibroblast growth factor receptor 1	ENSG00000077782	ENSG00000077782
VAV3	vav 3 guanine nucleotide exchange factor	ENSG00000134215	ENSG00000134215
UBB	ubiquitin B	ENSG00000170315	ENSG00000170315
FGFR4	fibroblast growth factor receptor 4	ENSG00000160867	ENSG00000160867
NTRK1	neurotrophic tyrosine kinase, receptor, type 1	ENSG00000198400	ENSG00000198400
PRKACB	protein kinase, cAMP-dependent, catalytic, beta	ENSG00000142875	ENSG00000142875
ITPR1	inositol 1,4,5-trisphosphate receptor, type 1	ENSG00000150995	ENSG00000150995
KITLG	KIT ligand	ENSG00000049130	ENSG00000049130
DUSP6	dual specificity phosphatase 6	ENSG00000139318	ENSG00000139318
OBSCN	obscurin, cytoskeletal calmodulin and titin-interacting RhoGEF	ENSG00000154358	ENSG00000154358
FGFR2	fibroblast growth factor receptor 2	ENSG00000066468	ENSG00000066468
GRB2	growth factor receptor-bound protein 2	ENSG00000177885	ENSG00000177885
RPS6KA2	ribosomal protein S6 kinase, 90kDa, polypeptide 2	ENSG00000071242	ENSG00000071242
PRKAR2B	protein kinase, cAMP-dependent, regulatory, type II, beta	ENSG00000005249	ENSG00000005249
PRKAR1B	protein kinase, cAMP-dependent, regulatory, type I, beta	ENSG00000188191	ENSG00000188191
BCL2L11	BCL2-like 11 (apoptosis facilitator)	ENSG00000153094	ENSG00000153094
PDGFRB	platelet-derived growth factor receptor, beta polypeptide	ENSG00000113721	ENSG00000113721
ADCY5	adenylate cyclase 5	ENSG00000173175	ENSG00000173175
FOXO1	forkhead box O1	ENSG00000150907	ENSG00000150907
ADCY3	adenylate cyclase 3	ENSG00000138031	ENSG00000138031
AKT1	v-akt murine thymoma viral oncogene homolog 1	ENSG00000142208	ENSG00000142208
FGF1	fibroblast growth factor 1 (acidic)	ENSG00000113578	ENSG00000113578
PDGFRA	platelet-derived growth factor receptor, alpha polypeptide	ENSG00000134853	ENSG00000134853
PLCG1	phospholipase C, gamma 1	ENSG00000124181	ENSG00000124181
GO:0008284	positive regulation of cell proliferation	P	6.674439e-12	53/478	13
CCK	cholecystokinin	ENSG00000187094	ENSG00000187094
RARG	retinoic acid receptor, gamma	ENSG00000172819	ENSG00000172819
PBX1	pre-B-cell leukemia homeobox 1	ENSG00000185630	ENSG00000185630
TGFB2	transforming growth factor, beta 2	ENSG00000092969	ENSG00000092969
SPHK2	sphingosine kinase 2	ENSG00000063176	ENSG00000063176
WNT7A	wingless-type MMTV integration site family, member 7A	ENSG00000154764	ENSG00000154764
IL4	interleukin 4	ENSG00000113520	ENSG00000113520
INS	insulin	ENSG00000254647	ENSG00000254647
NKX2-5	NK2 homeobox 5	ENSG00000183072	ENSG00000183072
MLXIPL	MLX interacting protein-like	ENSG00000009950	ENSG00000009950
WNT7B	wingless-type MMTV integration site family, member 7B	ENSG00000188064	ENSG00000188064
CDKN1B	cyclin-dependent kinase inhibitor 1B (p27, Kip1)	ENSG00000111276	ENSG00000111276
IGF1R	insulin-like growth factor 1 receptor	ENSG00000140443	ENSG00000140443
NOD2	nucleotide-binding oligomerization domain containing 2	ENSG00000167207	ENSG00000167207
EDNRA	endothelin receptor type A	ENSG00000151617	ENSG00000151617
EDN3	endothelin 3	ENSG00000124205	ENSG00000124205
INSR	insulin receptor	ENSG00000171105	ENSG00000171105
FOXM1	forkhead box M1	ENSG00000111206	ENSG00000111206
NTF3	neurotrophin 3	ENSG00000185652	ENSG00000185652
HES1	hes family bHLH transcription factor 1	ENSG00000114315	ENSG00000114315
KDR	kinase insert domain receptor (a type III receptor tyrosine kinase)	ENSG00000128052	ENSG00000128052
RARA	retinoic acid receptor, alpha	ENSG00000131759	ENSG00000131759
GHRH	growth hormone releasing hormone	ENSG00000118702	ENSG00000118702
SFRP1	secreted frizzled-related protein 1	ENSG00000104332	ENSG00000104332
FGFR1	fibroblast growth factor receptor 1	ENSG00000077782	ENSG00000077782
LRP5	low density lipoprotein receptor-related protein 5	ENSG00000162337	ENSG00000162337
FGFR4	fibroblast growth factor receptor 4	ENSG00000160867	ENSG00000160867
NKX2-6	NK2 homeobox 6	ENSG00000180053	ENSG00000180053
PDX1	pancreatic and duodenal homeobox 1	ENSG00000139515	ENSG00000139515
ALOX12	arachidonate 12-lipoxygenase	ENSG00000108839	ENSG00000108839
KITLG	KIT ligand	ENSG00000049130	ENSG00000049130
SOX9	SRY (sex determining region Y)-box 9	ENSG00000125398	ENSG00000125398
GLI2	GLI family zinc finger 2	ENSG00000074047	ENSG00000074047
FGFR2	fibroblast growth factor receptor 2	ENSG00000066468	ENSG00000066468
EDN2	endothelin 2	ENSG00000127129	ENSG00000127129
NODAL	nodal growth differentiation factor	ENSG00000156574	ENSG00000156574
AR	androgen receptor	ENSG00000169083	ENSG00000169083
CHRNA7	cholinergic receptor, nicotinic, alpha 7 (neuronal)	ENSG00000175344	ENSG00000175344
PDGFRB	platelet-derived growth factor receptor, beta polypeptide	ENSG00000113721	ENSG00000113721
PRKCZ	protein kinase C, zeta	ENSG00000067606	ENSG00000067606
NOTCH1	notch 1	ENSG00000148400	ENSG00000148400
SHH	sonic hedgehog	ENSG00000164690	ENSG00000164690
RECQL4	RecQ protein-like 4	ENSG00000160957	ENSG00000160957
TBX3	T-box 3	ENSG00000135111	ENSG00000135111
AVPR1A	arginine vasopressin receptor 1A	ENSG00000166148	ENSG00000166148
HDAC4	histone deacetylase 4	ENSG00000068024	ENSG00000068024
OSM	oncostatin M	ENSG00000099985	ENSG00000099985
FGF1	fibroblast growth factor 1 (acidic)	ENSG00000113578	ENSG00000113578
RPA1	replication protein A1, 70kDa	ENSG00000132383	ENSG00000132383
PDGFRA	platelet-derived growth factor receptor, alpha polypeptide	ENSG00000134853	ENSG00000134853
PTK2	protein tyrosine kinase 2	ENSG00000169398	ENSG00000169398
EDNRB	endothelin receptor type B	ENSG00000136160	ENSG00000136160
GREM1	gremlin 1, DAN family BMP antagonist	ENSG00000166923	ENSG00000166923
GO:0043524	negative regulation of neuron apoptosis	P	7.572498e-12	18/129	14
TP73	tumor protein p73	ENSG00000078900	ENSG00000078900
BRAF	v-raf murine sarcoma viral oncogene homolog B	ENSG00000157764	ENSG00000157764
ERBB3	v-erb-b2 avian erythroblastic leukemia viral oncogene homolog 3	ENSG00000065361	ENSG00000065361
SNCA	synuclein, alpha (non A4 component of amyloid precursor)	ENSG00000145335	ENSG00000145335
MEF2C	myocyte enhancer factor 2C	ENSG00000081189	ENSG00000081189
HTT	huntingtin	ENSG00000197386	ENSG00000197386
NTF3	neurotrophin 3	ENSG00000185652	ENSG00000185652
HMOX1	heme oxygenase (decycling) 1	ENSG00000100292	ENSG00000100292
LRP1	low density lipoprotein receptor-related protein 1	ENSG00000123384	ENSG00000123384
KDM2B	lysine (K)-specific demethylase 2B	ENSG00000089094	ENSG00000089094
GRIN1	glutamate receptor, ionotropic, N-methyl D-aspartate 1	ENSG00000176884	ENSG00000176884
NTRK1	neurotrophic tyrosine kinase, receptor, type 1	ENSG00000198400	ENSG00000198400
NRP1	neuropilin 1	ENSG00000099250	ENSG00000099250
GRIK2	glutamate receptor, ionotropic, kainate 2	ENSG00000164418	ENSG00000164418
CACNA1A	calcium channel, voltage-dependent, P/Q type, alpha 1A subunit	ENSG00000141837	ENSG00000141837
BDNF	brain-derived neurotrophic factor	ENSG00000176697	ENSG00000176697
XRCC4	X-ray repair complementing defective repair in Chinese hamster cells 4	ENSG00000152422	ENSG00000152422
GDNF	glial cell derived neurotrophic factor	ENSG00000168621	ENSG00000168621
GO:0001658	branching involved in ureteric bud morphogenesis	P	9.448886e-12	14/53	15
PBX1	pre-B-cell leukemia homeobox 1	ENSG00000185630	ENSG00000185630
LAMA5	laminin, alpha 5	ENSG00000130702	ENSG00000130702
WNT4	wingless-type MMTV integration site family, member 4	ENSG00000162552	ENSG00000162552
FOXD2	forkhead box D2	ENSG00000186564	ENSG00000186564
FOXD3	forkhead box D3	ENSG00000187140	ENSG00000187140
HOXA11	homeobox A11	ENSG00000005073	ENSG00000005073
WT1	Wilms tumor 1	ENSG00000184937	ENSG00000184937
GLI3	GLI family zinc finger 3	ENSG00000106571	ENSG00000106571
SOX9	SRY (sex determining region Y)-box 9	ENSG00000125398	ENSG00000125398
SHH	sonic hedgehog	ENSG00000164690	ENSG00000164690
SALL1	spalt-like transcription factor 1	ENSG00000103449	ENSG00000103449
FOXD4L1	forkhead box D4-like 1	ENSG00000184492	ENSG00000184492
GDNF	glial cell derived neurotrophic factor	ENSG00000168621	ENSG00000168621
GREM1	gremlin 1, DAN family BMP antagonist	ENSG00000166923	ENSG00000166923
GO:0042493	response to drug	P	9.517942e-12	33/348	16
INHBA	inhibin, beta A	ENSG00000122641	ENSG00000122641
TGFB2	transforming growth factor, beta 2	ENSG00000092969	ENSG00000092969
IL4	interleukin 4	ENSG00000113520	ENSG00000113520
SLC8A1	solute carrier family 8 (sodium/calcium exchanger), member 1	ENSG00000183023	ENSG00000183023
CDKN1B	cyclin-dependent kinase inhibitor 1B (p27, Kip1)	ENSG00000111276	ENSG00000111276
SNCA	synuclein, alpha (non A4 component of amyloid precursor)	ENSG00000145335	ENSG00000145335
FYN	FYN oncogene related to SRC, FGR, YES	ENSG00000010810	ENSG00000010810
CDH1	cadherin 1, type 1, E-cadherin (epithelial)	ENSG00000039068	ENSG00000039068
SFRP1	secreted frizzled-related protein 1	ENSG00000104332	ENSG00000104332
SMAD1	SMAD family member 1	ENSG00000170365	ENSG00000170365
CYP1A1	cytochrome P450, family 1, subfamily A, polypeptide 1	ENSG00000140465	ENSG00000140465
VAV3	vav 3 guanine nucleotide exchange factor	ENSG00000134215	ENSG00000134215
HDAC5	histone deacetylase 5	ENSG00000108840	ENSG00000108840
SRR	serine racemase	ENSG00000167720	ENSG00000167720
NTRK1	neurotrophic tyrosine kinase, receptor, type 1	ENSG00000198400	ENSG00000198400
PDX1	pancreatic and duodenal homeobox 1	ENSG00000139515	ENSG00000139515
TH	tyrosine hydroxylase	ENSG00000180176	ENSG00000180176
APEX1	APEX nuclease (multifunctional DNA repair enzyme) 1	ENSG00000100823	ENSG00000100823
DUSP6	dual specificity phosphatase 6	ENSG00000139318	ENSG00000139318
HTR2C	5-hydroxytryptamine (serotonin) receptor 2C, G protein-coupled	ENSG00000147246	ENSG00000147246
GRIN2A	glutamate receptor, ionotropic, N-methyl D-aspartate 2A	ENSG00000183454	ENSG00000183454
GNAO1	guanine nucleotide binding protein (G protein), alpha activating activity polypeptide O	ENSG00000087258	ENSG00000087258
ADRA1A	adrenoceptor alpha 1A	ENSG00000120907	ENSG00000120907
APOC3	apolipoprotein C-III	ENSG00000110245	ENSG00000110245
AQP1	aquaporin 1 (Colton blood group)	ENSG00000240583	ENSG00000240583
DPYSL2	dihydropyrimidinase-like 2	ENSG00000092964	ENSG00000092964
GATA4	GATA binding protein 4	ENSG00000136574	ENSG00000136574
APOC2	apolipoprotein C-II	ENSG00000234906	ENSG00000234906
BDNF	brain-derived neurotrophic factor	ENSG00000176697	ENSG00000176697
DRD2	dopamine receptor D2	ENSG00000149295	ENSG00000149295
HDAC4	histone deacetylase 4	ENSG00000068024	ENSG00000068024
UGT1A8	UDP glucuronosyltransferase 1 family, polypeptide A8	ENSG00000241635	ENSG00000241635
PTK2	protein tyrosine kinase 2	ENSG00000169398	ENSG00000169398
GO:0010628	positive regulation of gene expression	P	9.569234e-12	19/183	17
RARG	retinoic acid receptor, gamma	ENSG00000172819	ENSG00000172819
TGFB2	transforming growth factor, beta 2	ENSG00000092969	ENSG00000092969
NKX2-5	NK2 homeobox 5	ENSG00000183072	ENSG00000183072
BRAF	v-raf murine sarcoma viral oncogene homolog B	ENSG00000157764	ENSG00000157764
WNT7B	wingless-type MMTV integration site family, member 7B	ENSG00000188064	ENSG00000188064
CITED2	Cbp/p300-interacting transactivator, with Glu/Asp-rich carboxy-terminal domain, 2	ENSG00000164442	ENSG00000164442
MEF2C	myocyte enhancer factor 2C	ENSG00000081189	ENSG00000081189
CDK6	cyclin-dependent kinase 6	ENSG00000105810	ENSG00000105810
RARA	retinoic acid receptor, alpha	ENSG00000131759	ENSG00000131759
SPRY2	sprouty homolog 2 (Drosophila)	ENSG00000136158	ENSG00000136158
SFRP4	secreted frizzled-related protein 4	ENSG00000106483	ENSG00000106483
SMAD1	SMAD family member 1	ENSG00000170365	ENSG00000170365
NKX2-1	NK2 homeobox 1	ENSG00000136352	ENSG00000136352
ALOX12	arachidonate 12-lipoxygenase	ENSG00000108839	ENSG00000108839
SOX9	SRY (sex determining region Y)-box 9	ENSG00000125398	ENSG00000125398
RPS6KA2	ribosomal protein S6 kinase, 90kDa, polypeptide 2	ENSG00000071242	ENSG00000071242
HNF1B	HNF1 homeobox B	ENSG00000108753	ENSG00000108753
WNT16	wingless-type MMTV integration site family, member 16	ENSG00000002745	ENSG00000002745
SHH	sonic hedgehog	ENSG00000164690	ENSG00000164690
GO:0042476	odontogenesis	P	9.831025e-12	9/33	18
INHBA	inhibin, beta A	ENSG00000122641	ENSG00000122641
TGFB2	transforming growth factor, beta 2	ENSG00000092969	ENSG00000092969
BCOR	BCL6 corepressor	ENSG00000183337	ENSG00000183337
MSX1	msh homeobox 1	ENSG00000163132	ENSG00000163132
ID3	inhibitor of DNA binding 3, dominant negative helix-loop-helix protein	ENSG00000117318	ENSG00000117318
FGFR2	fibroblast growth factor receptor 2	ENSG00000066468	ENSG00000066468
AQP1	aquaporin 1 (Colton blood group)	ENSG00000240583	ENSG00000240583
SDC1	syndecan 1	ENSG00000115884	ENSG00000115884
SHH	sonic hedgehog	ENSG00000164690	ENSG00000164690
GO:0018108	peptidyl-tyrosine phosphorylation	P	1.036882e-11	15/90	19
IGF1R	insulin-like growth factor 1 receptor	ENSG00000140443	ENSG00000140443
DYRK1A	dual-specificity tyrosine-(Y)-phosphorylation regulated kinase 1A	ENSG00000157540	ENSG00000157540
INSR	insulin receptor	ENSG00000171105	ENSG00000171105
FYN	FYN oncogene related to SRC, FGR, YES	ENSG00000010810	ENSG00000010810
KDR	kinase insert domain receptor (a type III receptor tyrosine kinase)	ENSG00000128052	ENSG00000128052
FGFR1	fibroblast growth factor receptor 1	ENSG00000077782	ENSG00000077782
FGFR4	fibroblast growth factor receptor 4	ENSG00000160867	ENSG00000160867
FGFR2	fibroblast growth factor receptor 2	ENSG00000066468	ENSG00000066468
PDGFRB	platelet-derived growth factor receptor, beta polypeptide	ENSG00000113721	ENSG00000113721
CSK	c-src tyrosine kinase	ENSG00000103653	ENSG00000103653
RELN	reelin	ENSG00000189056	ENSG00000189056
EPHB2	EPH receptor B2	ENSG00000133216	ENSG00000133216
EPHA7	EPH receptor A7	ENSG00000135333	ENSG00000135333
PDGFRA	platelet-derived growth factor receptor, alpha polypeptide	ENSG00000134853	ENSG00000134853
PTK2	protein tyrosine kinase 2	ENSG00000169398	ENSG00000169398
GO:0030324	lung development	P	1.054667e-11	25/112	20
LAMA5	laminin, alpha 5	ENSG00000130702	ENSG00000130702
WNT7B	wingless-type MMTV integration site family, member 7B	ENSG00000188064	ENSG00000188064
FOXA2	forkhead box A2	ENSG00000125798	ENSG00000125798
HES1	hes family bHLH transcription factor 1	ENSG00000114315	ENSG00000114315
KDR	kinase insert domain receptor (a type III receptor tyrosine kinase)	ENSG00000128052	ENSG00000128052
SPRY2	sprouty homolog 2 (Drosophila)	ENSG00000136158	ENSG00000136158
FGFR1	fibroblast growth factor receptor 1	ENSG00000077782	ENSG00000077782
NKX2-1	NK2 homeobox 1	ENSG00000136352	ENSG00000136352
GLI3	GLI family zinc finger 3	ENSG00000106571	ENSG00000106571
FGFR4	fibroblast growth factor receptor 4	ENSG00000160867	ENSG00000160867
PDPN	podoplanin	ENSG00000162493	ENSG00000162493
TBX5	T-box 5	ENSG00000089225	ENSG00000089225
FOXP1	forkhead box P1	ENSG00000114861	ENSG00000114861
GLI2	GLI family zinc finger 2	ENSG00000074047	ENSG00000074047
FGFR2	fibroblast growth factor receptor 2	ENSG00000066468	ENSG00000066468
NODAL	nodal growth differentiation factor	ENSG00000156574	ENSG00000156574
TSHZ3	teashirt zinc finger homeobox 3	ENSG00000121297	ENSG00000121297
BMPR1A	bone morphogenetic protein receptor, type IA	ENSG00000107779	ENSG00000107779
CEBPA	CCAAT/enhancer binding protein (C/EBP), alpha	ENSG00000245848	ENSG00000245848
NOTCH1	notch 1	ENSG00000148400	ENSG00000148400
SHH	sonic hedgehog	ENSG00000164690	ENSG00000164690
FOXP2	forkhead box P2	ENSG00000128573	ENSG00000128573
FGF1	fibroblast growth factor 1 (acidic)	ENSG00000113578	ENSG00000113578
FOXA1	forkhead box A1	ENSG00000129514	ENSG00000129514
PDGFRA	platelet-derived growth factor receptor, alpha polypeptide	ENSG00000134853	ENSG00000134853
GO:0042802	identical protein binding	F	1.057332e-11	39/542	21
INHBA	inhibin, beta A	ENSG00000122641	ENSG00000122641
TP73	tumor protein p73	ENSG00000078900	ENSG00000078900
ROBO2	roundabout, axon guidance receptor, homolog 2 (Drosophila)	ENSG00000185008	ENSG00000185008
PFKFB1	6-phosphofructo-2-kinase/fructose-2,6-biphosphatase 1	ENSG00000158571	ENSG00000158571
AIRE	autoimmune regulator	ENSG00000160224	ENSG00000160224
INS	insulin	ENSG00000254647	ENSG00000254647
BRAF	v-raf murine sarcoma viral oncogene homolog B	ENSG00000157764	ENSG00000157764
PRMT8	protein arginine methyltransferase 8	ENSG00000111218	ENSG00000111218
IGF1R	insulin-like growth factor 1 receptor	ENSG00000140443	ENSG00000140443
SNCA	synuclein, alpha (non A4 component of amyloid precursor)	ENSG00000145335	ENSG00000145335
STK4	serine/threonine kinase 4	ENSG00000101109	ENSG00000101109
HTT	huntingtin	ENSG00000197386	ENSG00000197386
HCN4	hyperpolarization activated cyclic nucleotide-gated potassium channel 4	ENSG00000138622	ENSG00000138622
CD74	CD74 molecule, major histocompatibility complex, class II invariant chain	ENSG00000019582	ENSG00000019582
FBP1	fructose-1,6-bisphosphatase 1	ENSG00000165140	ENSG00000165140
RYR2	ryanodine receptor 2 (cardiac)	ENSG00000198626	ENSG00000198626
NFKBIA	nuclear factor of kappa light polypeptide gene enhancer in B-cells inhibitor, alpha	ENSG00000100906	ENSG00000100906
AXIN1	axin 1	ENSG00000103126	ENSG00000103126
SFRP1	secreted frizzled-related protein 1	ENSG00000104332	ENSG00000104332
FGFR1	fibroblast growth factor receptor 1	ENSG00000077782	ENSG00000077782
SMAD1	SMAD family member 1	ENSG00000170365	ENSG00000170365
TP63	tumor protein p63	ENSG00000073282	ENSG00000073282
FASN	fatty acid synthase	ENSG00000169710	ENSG00000169710
HAND1	heart and neural crest derivatives expressed 1	ENSG00000113196	ENSG00000113196
PCSK9	proprotein convertase subtilisin/kexin type 9	ENSG00000169174	ENSG00000169174
ATXN10	ataxin 10	ENSG00000130638	ENSG00000130638
CBS	cystathionine-beta-synthase	ENSG00000160200	ENSG00000160200
KCNIP2	Kv channel interacting protein 2	ENSG00000120049	ENSG00000120049
NOD1	nucleotide-binding oligomerization domain containing 1	ENSG00000106100	ENSG00000106100
RAD51	RAD51 recombinase	ENSG00000051180	ENSG00000051180
GRB2	growth factor receptor-bound protein 2	ENSG00000177885	ENSG00000177885
HCN2	hyperpolarization activated cyclic nucleotide-gated potassium channel 2	ENSG00000099822	ENSG00000099822
MAP1S	microtubule-associated protein 1S	ENSG00000130479	ENSG00000130479
PAK2	p21 protein (Cdc42/Rac)-activated kinase 2	ENSG00000180370	ENSG00000180370
CSK	c-src tyrosine kinase	ENSG00000103653	ENSG00000103653
DRD2	dopamine receptor D2	ENSG00000149295	ENSG00000149295
LEPR	leptin receptor	ENSG00000116678	ENSG00000116678
AKT1	v-akt murine thymoma viral oncogene homolog 1	ENSG00000142208	ENSG00000142208
BNIP3	BCL2/adenovirus E1B 19kDa interacting protein 3	ENSG00000176171	ENSG00000176171
GO:0005667	transcription factor complex	C	1.082512e-11	33/253	22
TP73	tumor protein p73	ENSG00000078900	ENSG00000078900
RARG	retinoic acid receptor, gamma	ENSG00000172819	ENSG00000172819
PBX1	pre-B-cell leukemia homeobox 1	ENSG00000185630	ENSG00000185630
HDAC9	histone deacetylase 9	ENSG00000048052	ENSG00000048052
NKX2-5	NK2 homeobox 5	ENSG00000183072	ENSG00000183072
ZFHX3	zinc finger homeobox 3	ENSG00000140836	ENSG00000140836
MLXIPL	MLX interacting protein-like	ENSG00000009950	ENSG00000009950
FOXD2	forkhead box D2	ENSG00000186564	ENSG00000186564
SMAD6	SMAD family member 6	ENSG00000137834	ENSG00000137834
FOXM1	forkhead box M1	ENSG00000111206	ENSG00000111206
FOXD3	forkhead box D3	ENSG00000187140	ENSG00000187140
FOXA2	forkhead box A2	ENSG00000125798	ENSG00000125798
HOXA11	homeobox A11	ENSG00000005073	ENSG00000005073
SMAD1	SMAD family member 1	ENSG00000170365	ENSG00000170365
TP63	tumor protein p63	ENSG00000073282	ENSG00000073282
FOXQ1	forkhead box Q1	ENSG00000164379	ENSG00000164379
NKX2-1	NK2 homeobox 1	ENSG00000136352	ENSG00000136352
TCF7L2	transcription factor 7-like 2 (T-cell specific, HMG-box)	ENSG00000148737	ENSG00000148737
MSX1	msh homeobox 1	ENSG00000163132	ENSG00000163132
SMAD3	SMAD family member 3	ENSG00000166949	ENSG00000166949
TBX5	T-box 5	ENSG00000089225	ENSG00000089225
ATF4	activating transcription factor 4	ENSG00000128272	ENSG00000128272
SOX9	SRY (sex determining region Y)-box 9	ENSG00000125398	ENSG00000125398
APEX1	APEX nuclease (multifunctional DNA repair enzyme) 1	ENSG00000100823	ENSG00000100823
FOXI2	forkhead box I2	ENSG00000186766	ENSG00000186766
HNF1B	HNF1 homeobox B	ENSG00000108753	ENSG00000108753
CEBPA	CCAAT/enhancer binding protein (C/EBP), alpha	ENSG00000245848	ENSG00000245848
FOXE3	forkhead box E3	ENSG00000186790	ENSG00000186790
MYOD1	myogenic differentiation 1	ENSG00000129152	ENSG00000129152
CREBBP	CREB binding protein	ENSG00000005339	ENSG00000005339
HNF1A	HNF1 homeobox A	ENSG00000135100	ENSG00000135100
FOXD4L1	forkhead box D4-like 1	ENSG00000184492	ENSG00000184492
FOXA1	forkhead box A1	ENSG00000129514	ENSG00000129514
GO:0001525	angiogenesis	P	1.087397e-11	20/216	23
TGFB2	transforming growth factor, beta 2	ENSG00000092969	ENSG00000092969
LAMA5	laminin, alpha 5	ENSG00000130702	ENSG00000130702
VAV2	vav 2 guanine nucleotide exchange factor	ENSG00000160293	ENSG00000160293
KDR	kinase insert domain receptor (a type III receptor tyrosine kinase)	ENSG00000128052	ENSG00000128052
FGFR1	fibroblast growth factor receptor 1	ENSG00000077782	ENSG00000077782
HMOX1	heme oxygenase (decycling) 1	ENSG00000100292	ENSG00000100292
STAB2	stabilin 2	ENSG00000136011	ENSG00000136011
VAV3	vav 3 guanine nucleotide exchange factor	ENSG00000134215	ENSG00000134215
HAND1	heart and neural crest derivatives expressed 1	ENSG00000113196	ENSG00000113196
ERAP1	endoplasmic reticulum aminopeptidase 1	ENSG00000164307	ENSG00000164307
NRP1	neuropilin 1	ENSG00000099250	ENSG00000099250
EPHB1	EPH receptor B1	ENSG00000154928	ENSG00000154928
ACVRL1	activin A receptor type II-like 1	ENSG00000139567	ENSG00000139567
FGFR2	fibroblast growth factor receptor 2	ENSG00000066468	ENSG00000066468
ANG	angiogenin, ribonuclease, RNase A family, 5	ENSG00000214274	ENSG00000214274
SHH	sonic hedgehog	ENSG00000164690	ENSG00000164690
EPHB2	EPH receptor B2	ENSG00000133216	ENSG00000133216
FGF1	fibroblast growth factor 1 (acidic)	ENSG00000113578	ENSG00000113578
PTK2	protein tyrosine kinase 2	ENSG00000169398	ENSG00000169398
GREM1	gremlin 1, DAN family BMP antagonist	ENSG00000166923	ENSG00000166923
GO:0007389	pattern specification process	P	1.087996e-11	24/101	24
FOXL1	forkhead box L1	ENSG00000176678	ENSG00000176678
FOXD2	forkhead box D2	ENSG00000186564	ENSG00000186564
ASCL1	achaete-scute family bHLH transcription factor 1	ENSG00000139352	ENSG00000139352
FOXM1	forkhead box M1	ENSG00000111206	ENSG00000111206
FOXD3	forkhead box D3	ENSG00000187140	ENSG00000187140
FOXA2	forkhead box A2	ENSG00000125798	ENSG00000125798
HES1	hes family bHLH transcription factor 1	ENSG00000114315	ENSG00000114315
TP63	tumor protein p63	ENSG00000073282	ENSG00000073282
FOXQ1	forkhead box Q1	ENSG00000164379	ENSG00000164379
NKX2-1	NK2 homeobox 1	ENSG00000136352	ENSG00000136352
GLI3	GLI family zinc finger 3	ENSG00000106571	ENSG00000106571
TBX5	T-box 5	ENSG00000089225	ENSG00000089225
FOXP1	forkhead box P1	ENSG00000114861	ENSG00000114861
FOXI2	forkhead box I2	ENSG00000186766	ENSG00000186766
GLI2	GLI family zinc finger 2	ENSG00000074047	ENSG00000074047
FOXK1	forkhead box K1	ENSG00000164916	ENSG00000164916
BMP7	bone morphogenetic protein 7	ENSG00000101144	ENSG00000101144
BMPR1A	bone morphogenetic protein receptor, type IA	ENSG00000107779	ENSG00000107779
FOXE3	forkhead box E3	ENSG00000186790	ENSG00000186790
SHH	sonic hedgehog	ENSG00000164690	ENSG00000164690
FOXD4L1	forkhead box D4-like 1	ENSG00000184492	ENSG00000184492
FOXO1	forkhead box O1	ENSG00000150907	ENSG00000150907
FOXP2	forkhead box P2	ENSG00000128573	ENSG00000128573
FOXA1	forkhead box A1	ENSG00000129514	ENSG00000129514
GO:0042475	odontogenesis of dentine-containing tooth	P	1.106293e-11	15/63	25
LAMA5	laminin, alpha 5	ENSG00000130702	ENSG00000130702
WNT7B	wingless-type MMTV integration site family, member 7B	ENSG00000188064	ENSG00000188064
EDA	ectodysplasin A	ENSG00000158813	ENSG00000158813
TP63	tumor protein p63	ENSG00000073282	ENSG00000073282
HAND1	heart and neural crest derivatives expressed 1	ENSG00000113196	ENSG00000113196
GLI3	GLI family zinc finger 3	ENSG00000106571	ENSG00000106571
TCF7L2	transcription factor 7-like 2 (T-cell specific, HMG-box)	ENSG00000148737	ENSG00000148737
MSX1	msh homeobox 1	ENSG00000163132	ENSG00000163132
JAG2	jagged 2	ENSG00000184916	ENSG00000184916
GLI2	GLI family zinc finger 2	ENSG00000074047	ENSG00000074047
BMP7	bone morphogenetic protein 7	ENSG00000101144	ENSG00000101144
BMPR1A	bone morphogenetic protein receptor, type IA	ENSG00000107779	ENSG00000107779
BCL2L11	BCL2-like 11 (apoptosis facilitator)	ENSG00000153094	ENSG00000153094
SHH	sonic hedgehog	ENSG00000164690	ENSG00000164690
PDGFRA	platelet-derived growth factor receptor, alpha polypeptide	ENSG00000134853	ENSG00000134853
GO:0008543	fibroblast growth factor receptor signaling pathway	P	1.129885e-11	24/165	26
NRG1	neuregulin 1	ENSG00000157168	ENSG00000157168
BRAF	v-raf murine sarcoma viral oncogene homolog B	ENSG00000157764	ENSG00000157764
ERBB3	v-erb-b2 avian erythroblastic leukemia viral oncogene homolog 3	ENSG00000065361	ENSG00000065361
CDKN1B	cyclin-dependent kinase inhibitor 1B (p27, Kip1)	ENSG00000111276	ENSG00000111276
FYN	FYN oncogene related to SRC, FGR, YES	ENSG00000010810	ENSG00000010810
SPRY2	sprouty homolog 2 (Drosophila)	ENSG00000136158	ENSG00000136158
FGFR1	fibroblast growth factor receptor 1	ENSG00000077782	ENSG00000077782
UBB	ubiquitin B	ENSG00000170315	ENSG00000170315
FGFR4	fibroblast growth factor receptor 4	ENSG00000160867	ENSG00000160867
PRKACB	protein kinase, cAMP-dependent, catalytic, beta	ENSG00000142875	ENSG00000142875
ITPR1	inositol 1,4,5-trisphosphate receptor, type 1	ENSG00000150995	ENSG00000150995
KITLG	KIT ligand	ENSG00000049130	ENSG00000049130
FGFR2	fibroblast growth factor receptor 2	ENSG00000066468	ENSG00000066468
GRB2	growth factor receptor-bound protein 2	ENSG00000177885	ENSG00000177885
PRKAR2B	protein kinase, cAMP-dependent, regulatory, type II, beta	ENSG00000005249	ENSG00000005249
PRKAR1B	protein kinase, cAMP-dependent, regulatory, type I, beta	ENSG00000188191	ENSG00000188191
PDGFRB	platelet-derived growth factor receptor, beta polypeptide	ENSG00000113721	ENSG00000113721
ADCY5	adenylate cyclase 5	ENSG00000173175	ENSG00000173175
FOXO1	forkhead box O1	ENSG00000150907	ENSG00000150907
ADCY3	adenylate cyclase 3	ENSG00000138031	ENSG00000138031
AKT1	v-akt murine thymoma viral oncogene homolog 1	ENSG00000142208	ENSG00000142208
FGF1	fibroblast growth factor 1 (acidic)	ENSG00000113578	ENSG00000113578
PDGFRA	platelet-derived growth factor receptor, alpha polypeptide	ENSG00000134853	ENSG00000134853
PLCG1	phospholipase C, gamma 1	ENSG00000124181	ENSG00000124181
GO:0001822	kidney development	P	1.175371e-11	18/120	27
TP73	tumor protein p73	ENSG00000078900	ENSG00000078900
WNT4	wingless-type MMTV integration site family, member 4	ENSG00000162552	ENSG00000162552
FOXD2	forkhead box D2	ENSG00000186564	ENSG00000186564
FOXD3	forkhead box D3	ENSG00000187140	ENSG00000187140
ALDH9A1	aldehyde dehydrogenase 9 family, member A1	ENSG00000143149	ENSG00000143149
SMAD1	SMAD family member 1	ENSG00000170365	ENSG00000170365
WT1	Wilms tumor 1	ENSG00000184937	ENSG00000184937
GLI3	GLI family zinc finger 3	ENSG00000106571	ENSG00000106571
PCSK9	proprotein convertase subtilisin/kexin type 9	ENSG00000169174	ENSG00000169174
GLI2	GLI family zinc finger 2	ENSG00000074047	ENSG00000074047
BMP7	bone morphogenetic protein 7	ENSG00000101144	ENSG00000101144
HNF1B	HNF1 homeobox B	ENSG00000108753	ENSG00000108753
BCL2L11	BCL2-like 11 (apoptosis facilitator)	ENSG00000153094	ENSG00000153094
PDGFRB	platelet-derived growth factor receptor, beta polypeptide	ENSG00000113721	ENSG00000113721
SHH	sonic hedgehog	ENSG00000164690	ENSG00000164690
SALL1	spalt-like transcription factor 1	ENSG00000103449	ENSG00000103449
BMP6	bone morphogenetic protein 6	ENSG00000153162	ENSG00000153162
FOXD4L1	forkhead box D4-like 1	ENSG00000184492	ENSG00000184492
GO:0006355	regulation of transcription, DNA-dependent	P	1.192013e-11	77/2101	28
NME1-NME2	NME1-NME2 readthrough	ENSG00000243678	ENSG00000243678
GTF2A1L	general transcription factor IIA, 1-like	ENSG00000242441	ENSG00000242441
TP73	tumor protein p73	ENSG00000078900	ENSG00000078900
AIRE	autoimmune regulator	ENSG00000160224	ENSG00000160224
RARG	retinoic acid receptor, gamma	ENSG00000172819	ENSG00000172819
PBX1	pre-B-cell leukemia homeobox 1	ENSG00000185630	ENSG00000185630
INS	insulin	ENSG00000254647	ENSG00000254647
NKX2-5	NK2 homeobox 5	ENSG00000183072	ENSG00000183072
ZFHX3	zinc finger homeobox 3	ENSG00000140836	ENSG00000140836
ASH1L	ash1 (absent, small, or homeotic)-like (Drosophila)	ENSG00000116539	ENSG00000116539
FOXL1	forkhead box L1	ENSG00000176678	ENSG00000176678
MLXIPL	MLX interacting protein-like	ENSG00000009950	ENSG00000009950
CITED2	Cbp/p300-interacting transactivator, with Glu/Asp-rich carboxy-terminal domain, 2	ENSG00000164442	ENSG00000164442
MEF2C	myocyte enhancer factor 2C	ENSG00000081189	ENSG00000081189
NR2F2	nuclear receptor subfamily 2, group F, member 2	ENSG00000185551	ENSG00000185551
FOXD2	forkhead box D2	ENSG00000186564	ENSG00000186564
INSR	insulin receptor	ENSG00000171105	ENSG00000171105
IGHMBP2	immunoglobulin mu binding protein 2	ENSG00000132740	ENSG00000132740
NOTCH2	notch 2	ENSG00000134250	ENSG00000134250
SMAD6	SMAD family member 6	ENSG00000137834	ENSG00000137834
FOXM1	forkhead box M1	ENSG00000111206	ENSG00000111206
FOXD3	forkhead box D3	ENSG00000187140	ENSG00000187140
FOXA2	forkhead box A2	ENSG00000125798	ENSG00000125798
HES1	hes family bHLH transcription factor 1	ENSG00000114315	ENSG00000114315
DLX5	distal-less homeobox 5	ENSG00000105880	ENSG00000105880
RARA	retinoic acid receptor, alpha	ENSG00000131759	ENSG00000131759
DYNLL1	dynein, light chain, LC8-type 1	ENSG00000088986	ENSG00000088986
HOXA11	homeobox A11	ENSG00000005073	ENSG00000005073
RXRG	retinoid X receptor, gamma	ENSG00000143171	ENSG00000143171
SMAD1	SMAD family member 1	ENSG00000170365	ENSG00000170365
TP63	tumor protein p63	ENSG00000073282	ENSG00000073282
WT1	Wilms tumor 1	ENSG00000184937	ENSG00000184937
FOXQ1	forkhead box Q1	ENSG00000164379	ENSG00000164379
NKX2-1	NK2 homeobox 1	ENSG00000136352	ENSG00000136352
GLI3	GLI family zinc finger 3	ENSG00000106571	ENSG00000106571
TCF7L2	transcription factor 7-like 2 (T-cell specific, HMG-box)	ENSG00000148737	ENSG00000148737
NKX2-6	NK2 homeobox 6	ENSG00000180053	ENSG00000180053
MSX1	msh homeobox 1	ENSG00000163132	ENSG00000163132
SMAD3	SMAD family member 3	ENSG00000166949	ENSG00000166949
SOX6	SRY (sex determining region Y)-box 6	ENSG00000110693	ENSG00000110693
CIITA	class II, major histocompatibility complex, transactivator	ENSG00000179583	ENSG00000179583
PDX1	pancreatic and duodenal homeobox 1	ENSG00000139515	ENSG00000139515
TBX5	T-box 5	ENSG00000089225	ENSG00000089225
MYF5	myogenic factor 5	ENSG00000111049	ENSG00000111049
ATF4	activating transcription factor 4	ENSG00000128272	ENSG00000128272
NR2F1	nuclear receptor subfamily 2, group F, member 1	ENSG00000175745	ENSG00000175745
FOXP1	forkhead box P1	ENSG00000114861	ENSG00000114861
APEX1	APEX nuclease (multifunctional DNA repair enzyme) 1	ENSG00000100823	ENSG00000100823
FADS1	fatty acid desaturase 1	ENSG00000149485	ENSG00000149485
IRF4	interferon regulatory factor 4	ENSG00000137265	ENSG00000137265
FOXI2	forkhead box I2	ENSG00000186766	ENSG00000186766
GLI2	GLI family zinc finger 2	ENSG00000074047	ENSG00000074047
ACVRL1	activin A receptor type II-like 1	ENSG00000139567	ENSG00000139567
FOXK1	forkhead box K1	ENSG00000164916	ENSG00000164916
IKZF1	IKAROS family zinc finger 1 (Ikaros)	ENSG00000185811	ENSG00000185811
TSHZ3	teashirt zinc finger homeobox 3	ENSG00000121297	ENSG00000121297
HNF1B	HNF1 homeobox B	ENSG00000108753	ENSG00000108753
AR	androgen receptor	ENSG00000169083	ENSG00000169083
GATA4	GATA binding protein 4	ENSG00000136574	ENSG00000136574
CEBPA	CCAAT/enhancer binding protein (C/EBP), alpha	ENSG00000245848	ENSG00000245848
FOXE3	forkhead box E3	ENSG00000186790	ENSG00000186790
NME2	NME/NM23 nucleoside diphosphate kinase 2	ENSG00000011052	ENSG00000011052
MYOD1	myogenic differentiation 1	ENSG00000129152	ENSG00000129152
NOTCH1	notch 1	ENSG00000148400	ENSG00000148400
NR5A2	nuclear receptor subfamily 5, group A, member 2	ENSG00000116833	ENSG00000116833
SHH	sonic hedgehog	ENSG00000164690	ENSG00000164690
TBX3	T-box 3	ENSG00000135111	ENSG00000135111
CREBBP	CREB binding protein	ENSG00000005339	ENSG00000005339
HNF1A	HNF1 homeobox A	ENSG00000135100	ENSG00000135100
CHD5	chromodomain helicase DNA binding protein 5	ENSG00000116254	ENSG00000116254
FOXD4L1	forkhead box D4-like 1	ENSG00000184492	ENSG00000184492
FOXO1	forkhead box O1	ENSG00000150907	ENSG00000150907
THRB	thyroid hormone receptor, beta	ENSG00000151090	ENSG00000151090
HR	hair growth associated	ENSG00000168453	ENSG00000168453
FOXP2	forkhead box P2	ENSG00000128573	ENSG00000128573
NKX6-2	NK6 homeobox 2	ENSG00000148826	ENSG00000148826
FOXA1	forkhead box A1	ENSG00000129514	ENSG00000129514
GO:0007399	nervous system development	P	1.202327e-11	28/358	29
NRG1	neuregulin 1	ENSG00000157168	ENSG00000157168
INHBA	inhibin, beta A	ENSG00000122641	ENSG00000122641
KALRN	kalirin, RhoGEF kinase	ENSG00000160145	ENSG00000160145
MEF2C	myocyte enhancer factor 2C	ENSG00000081189	ENSG00000081189
DYRK1A	dual-specificity tyrosine-(Y)-phosphorylation regulated kinase 1A	ENSG00000157540	ENSG00000157540
ASCL1	achaete-scute family bHLH transcription factor 1	ENSG00000139352	ENSG00000139352
NOTCH2	notch 2	ENSG00000134250	ENSG00000134250
NTF3	neurotrophin 3	ENSG00000185652	ENSG00000185652
ADORA1	adenosine A1 receptor	ENSG00000163485	ENSG00000163485
HES1	hes family bHLH transcription factor 1	ENSG00000114315	ENSG00000114315
DLX5	distal-less homeobox 5	ENSG00000105880	ENSG00000105880
NTRK1	neurotrophic tyrosine kinase, receptor, type 1	ENSG00000198400	ENSG00000198400
PDPN	podoplanin	ENSG00000162493	ENSG00000162493
ATXN10	ataxin 10	ENSG00000130638	ENSG00000130638
NR2F1	nuclear receptor subfamily 2, group F, member 1	ENSG00000175745	ENSG00000175745
MARK4	MAP/microtubule affinity-regulating kinase 4	ENSG00000007047	ENSG00000007047
VLDLR	very low density lipoprotein receptor	ENSG00000147852	ENSG00000147852
NODAL	nodal growth differentiation factor	ENSG00000156574	ENSG00000156574
DPYSL2	dihydropyrimidinase-like 2	ENSG00000092964	ENSG00000092964
BMPR1A	bone morphogenetic protein receptor, type IA	ENSG00000107779	ENSG00000107779
GSS	glutathione synthetase	ENSG00000100983	ENSG00000100983
MAP1S	microtubule-associated protein 1S	ENSG00000130479	ENSG00000130479
BDNF	brain-derived neurotrophic factor	ENSG00000176697	ENSG00000176697
INHA	inhibin, alpha	ENSG00000123999	ENSG00000123999
HDAC4	histone deacetylase 4	ENSG00000068024	ENSG00000068024
EPHB2	EPH receptor B2	ENSG00000133216	ENSG00000133216
GDNF	glial cell derived neurotrophic factor	ENSG00000168621	ENSG00000168621
EDNRB	endothelin receptor type B	ENSG00000136160	ENSG00000136160
GO:0043025	neuronal cell body	C	1.216116e-11	26/291	30
CCK	cholecystokinin	ENSG00000187094	ENSG00000187094
TGFB2	transforming growth factor, beta 2	ENSG00000092969	ENSG00000092969
ASCL1	achaete-scute family bHLH transcription factor 1	ENSG00000139352	ENSG00000139352
ADORA1	adenosine A1 receptor	ENSG00000163485	ENSG00000163485
RARA	retinoic acid receptor, alpha	ENSG00000131759	ENSG00000131759
ARHGEF2	Rho/Rac guanine nucleotide exchange factor (GEF) 2	ENSG00000116584	ENSG00000116584
LRP1	low density lipoprotein receptor-related protein 1	ENSG00000123384	ENSG00000123384
SRR	serine racemase	ENSG00000167720	ENSG00000167720
NTRK1	neurotrophic tyrosine kinase, receptor, type 1	ENSG00000198400	ENSG00000198400
TAC1	tachykinin, precursor 1	ENSG00000006128	ENSG00000006128
ATXN10	ataxin 10	ENSG00000130638	ENSG00000130638
NRP1	neuropilin 1	ENSG00000099250	ENSG00000099250
TH	tyrosine hydroxylase	ENSG00000180176	ENSG00000180176
GRIK2	glutamate receptor, ionotropic, kainate 2	ENSG00000164418	ENSG00000164418
CACNA1A	calcium channel, voltage-dependent, P/Q type, alpha 1A subunit	ENSG00000141837	ENSG00000141837
ACVRL1	activin A receptor type II-like 1	ENSG00000139567	ENSG00000139567
ANG	angiogenin, ribonuclease, RNase A family, 5	ENSG00000214274	ENSG00000214274
DPYSL2	dihydropyrimidinase-like 2	ENSG00000092964	ENSG00000092964
BMPR1A	bone morphogenetic protein receptor, type IA	ENSG00000107779	ENSG00000107779
CHRNA7	cholinergic receptor, nicotinic, alpha 7 (neuronal)	ENSG00000175344	ENSG00000175344
MAP1S	microtubule-associated protein 1S	ENSG00000130479	ENSG00000130479
INHA	inhibin, alpha	ENSG00000123999	ENSG00000123999
EPHB2	EPH receptor B2	ENSG00000133216	ENSG00000133216
EPHA7	EPH receptor A7	ENSG00000135333	ENSG00000135333
CDK5	cyclin-dependent kinase 5	ENSG00000164885	ENSG00000164885
PTPRK	protein tyrosine phosphatase, receptor type, K	ENSG00000152894	ENSG00000152894
GO:0019901	protein kinase binding	F	1.232658e-11	30/330	31
NME1-NME2	NME1-NME2 readthrough	ENSG00000243678	ENSG00000243678
TP73	tumor protein p73	ENSG00000078900	ENSG00000078900
IKBKB	inhibitor of kappa light polypeptide gene enhancer in B-cells, kinase beta	ENSG00000104365	ENSG00000104365
RPS6	ribosomal protein S6	ENSG00000137154	ENSG00000137154
BCAR1	breast cancer anti-estrogen resistance 1	ENSG00000050820	ENSG00000050820
MEF2C	myocyte enhancer factor 2C	ENSG00000081189	ENSG00000081189
NOD2	nucleotide-binding oligomerization domain containing 2	ENSG00000167207	ENSG00000167207
RYR2	ryanodine receptor 2 (cardiac)	ENSG00000198626	ENSG00000198626
FOXM1	forkhead box M1	ENSG00000111206	ENSG00000111206
SPRY2	sprouty homolog 2 (Drosophila)	ENSG00000136158	ENSG00000136158
AXIN1	axin 1	ENSG00000103126	ENSG00000103126
SMAD1	SMAD family member 1	ENSG00000170365	ENSG00000170365
TCF7L2	transcription factor 7-like 2 (T-cell specific, HMG-box)	ENSG00000148737	ENSG00000148737
SMAD3	SMAD family member 3	ENSG00000166949	ENSG00000166949
CACNB4	calcium channel, voltage-dependent, beta 4 subunit	ENSG00000182389	ENSG00000182389
ACVRL1	activin A receptor type II-like 1	ENSG00000139567	ENSG00000139567
GRB2	growth factor receptor-bound protein 2	ENSG00000177885	ENSG00000177885
DPYSL2	dihydropyrimidinase-like 2	ENSG00000092964	ENSG00000092964
CHRNA7	cholinergic receptor, nicotinic, alpha 7 (neuronal)	ENSG00000175344	ENSG00000175344
PDGFRB	platelet-derived growth factor receptor, beta polypeptide	ENSG00000113721	ENSG00000113721
CD3E	CD3e molecule, epsilon (CD3-TCR complex)	ENSG00000198851	ENSG00000198851
PRKCZ	protein kinase C, zeta	ENSG00000067606	ENSG00000067606
NME2	NME/NM23 nucleoside diphosphate kinase 2	ENSG00000011052	ENSG00000011052
MAPT	microtubule-associated protein tau	ENSG00000186868	ENSG00000186868
PAK2	p21 protein (Cdc42/Rac)-activated kinase 2	ENSG00000180370	ENSG00000180370
PRKAG2	protein kinase, AMP-activated, gamma 2 non-catalytic subunit	ENSG00000106617	ENSG00000106617
AKT1	v-akt murine thymoma viral oncogene homolog 1	ENSG00000142208	ENSG00000142208
HDAC4	histone deacetylase 4	ENSG00000068024	ENSG00000068024
PTK2	protein tyrosine kinase 2	ENSG00000169398	ENSG00000169398
PTPRK	protein tyrosine phosphatase, receptor type, K	ENSG00000152894	ENSG00000152894
GO:0045892	negative regulation of transcription, DNA-dependent	P	1.243039e-11	51/511	32
NRG1	neuregulin 1	ENSG00000157168	ENSG00000157168
HDAC9	histone deacetylase 9	ENSG00000048052	ENSG00000048052
BCOR	BCL6 corepressor	ENSG00000183337	ENSG00000183337
IL4	interleukin 4	ENSG00000113520	ENSG00000113520
NKX2-5	NK2 homeobox 5	ENSG00000183072	ENSG00000183072
ZFHX3	zinc finger homeobox 3	ENSG00000140836	ENSG00000140836
MLXIPL	MLX interacting protein-like	ENSG00000009950	ENSG00000009950
CDKN1B	cyclin-dependent kinase inhibitor 1B (p27, Kip1)	ENSG00000111276	ENSG00000111276
CITED2	Cbp/p300-interacting transactivator, with Glu/Asp-rich carboxy-terminal domain, 2	ENSG00000164442	ENSG00000164442
NR2F2	nuclear receptor subfamily 2, group F, member 2	ENSG00000185551	ENSG00000185551
WNT4	wingless-type MMTV integration site family, member 4	ENSG00000162552	ENSG00000162552
ATP8B1	ATPase, aminophospholipid transporter, class I, type 8B, member 1	ENSG00000081923	ENSG00000081923
ASCL1	achaete-scute family bHLH transcription factor 1	ENSG00000139352	ENSG00000139352
FOXM1	forkhead box M1	ENSG00000111206	ENSG00000111206
HES1	hes family bHLH transcription factor 1	ENSG00000114315	ENSG00000114315
RARA	retinoic acid receptor, alpha	ENSG00000131759	ENSG00000131759
SFRP1	secreted frizzled-related protein 1	ENSG00000104332	ENSG00000104332
TP63	tumor protein p63	ENSG00000073282	ENSG00000073282
WT1	Wilms tumor 1	ENSG00000184937	ENSG00000184937
BCL6	B-cell CLL/lymphoma 6	ENSG00000113916	ENSG00000113916
HDAC5	histone deacetylase 5	ENSG00000108840	ENSG00000108840
HAND1	heart and neural crest derivatives expressed 1	ENSG00000113196	ENSG00000113196
GLI3	GLI family zinc finger 3	ENSG00000106571	ENSG00000106571
TCF7L2	transcription factor 7-like 2 (T-cell specific, HMG-box)	ENSG00000148737	ENSG00000148737
MSX1	msh homeobox 1	ENSG00000163132	ENSG00000163132
SOX6	SRY (sex determining region Y)-box 6	ENSG00000110693	ENSG00000110693
CIITA	class II, major histocompatibility complex, transactivator	ENSG00000179583	ENSG00000179583
PDX1	pancreatic and duodenal homeobox 1	ENSG00000139515	ENSG00000139515
SOX9	SRY (sex determining region Y)-box 9	ENSG00000125398	ENSG00000125398
FOXP1	forkhead box P1	ENSG00000114861	ENSG00000114861
ID3	inhibitor of DNA binding 3, dominant negative helix-loop-helix protein	ENSG00000117318	ENSG00000117318
FOXK1	forkhead box K1	ENSG00000164916	ENSG00000164916
IKZF1	IKAROS family zinc finger 1 (Ikaros)	ENSG00000185811	ENSG00000185811
BMP7	bone morphogenetic protein 7	ENSG00000101144	ENSG00000101144
TSHZ3	teashirt zinc finger homeobox 3	ENSG00000121297	ENSG00000121297
CEBPA	CCAAT/enhancer binding protein (C/EBP), alpha	ENSG00000245848	ENSG00000245848
NOTCH1	notch 1	ENSG00000148400	ENSG00000148400
TBL1XR1	transducin (beta)-like 1 X-linked receptor 1	ENSG00000177565	ENSG00000177565
SALL1	spalt-like transcription factor 1	ENSG00000103449	ENSG00000103449
TBX3	T-box 3	ENSG00000135111	ENSG00000135111
FOXO1	forkhead box O1	ENSG00000150907	ENSG00000150907
THRB	thyroid hormone receptor, beta	ENSG00000151090	ENSG00000151090
HR	hair growth associated	ENSG00000168453	ENSG00000168453
MESP1	mesoderm posterior 1 homolog (mouse)	ENSG00000166823	ENSG00000166823
FOXP2	forkhead box P2	ENSG00000128573	ENSG00000128573
HDAC4	histone deacetylase 4	ENSG00000068024	ENSG00000068024
KDM4A	lysine (K)-specific demethylase 4A	ENSG00000066135	ENSG00000066135
CDK5	cyclin-dependent kinase 5	ENSG00000164885	ENSG00000164885
PTPRK	protein tyrosine phosphatase, receptor type, K	ENSG00000152894	ENSG00000152894
PRDM16	PR domain containing 16	ENSG00000142611	ENSG00000142611
GREM1	gremlin 1, DAN family BMP antagonist	ENSG00000166923	ENSG00000166923
GO:0045893	positive regulation of transcription, DNA-dependent	P	1.298561e-11	70/586	33
INHBA	inhibin, beta A	ENSG00000122641	ENSG00000122641
TP73	tumor protein p73	ENSG00000078900	ENSG00000078900
IKBKB	inhibitor of kappa light polypeptide gene enhancer in B-cells, kinase beta	ENSG00000104365	ENSG00000104365
AIRE	autoimmune regulator	ENSG00000160224	ENSG00000160224
WNT7A	wingless-type MMTV integration site family, member 7A	ENSG00000154764	ENSG00000154764
IL4	interleukin 4	ENSG00000113520	ENSG00000113520
NKX2-5	NK2 homeobox 5	ENSG00000183072	ENSG00000183072
MLXIPL	MLX interacting protein-like	ENSG00000009950	ENSG00000009950
CITED2	Cbp/p300-interacting transactivator, with Glu/Asp-rich carboxy-terminal domain, 2	ENSG00000164442	ENSG00000164442
MEF2C	myocyte enhancer factor 2C	ENSG00000081189	ENSG00000081189
NR2F2	nuclear receptor subfamily 2, group F, member 2	ENSG00000185551	ENSG00000185551
WNT4	wingless-type MMTV integration site family, member 4	ENSG00000162552	ENSG00000162552
FOXM1	forkhead box M1	ENSG00000111206	ENSG00000111206
NFKBIA	nuclear factor of kappa light polypeptide gene enhancer in B-cells inhibitor, alpha	ENSG00000100906	ENSG00000100906
FOXA2	forkhead box A2	ENSG00000125798	ENSG00000125798
HES1	hes family bHLH transcription factor 1	ENSG00000114315	ENSG00000114315
CDH1	cadherin 1, type 1, E-cadherin (epithelial)	ENSG00000039068	ENSG00000039068
DLX5	distal-less homeobox 5	ENSG00000105880	ENSG00000105880
RARA	retinoic acid receptor, alpha	ENSG00000131759	ENSG00000131759
AXIN1	axin 1	ENSG00000103126	ENSG00000103126
HOXA11	homeobox A11	ENSG00000005073	ENSG00000005073
SFRP1	secreted frizzled-related protein 1	ENSG00000104332	ENSG00000104332
LRP5	low density lipoprotein receptor-related protein 5	ENSG00000162337	ENSG00000162337
TP63	tumor protein p63	ENSG00000073282	ENSG00000073282
WT1	Wilms tumor 1	ENSG00000184937	ENSG00000184937
NKX2-1	NK2 homeobox 1	ENSG00000136352	ENSG00000136352
HAND1	heart and neural crest derivatives expressed 1	ENSG00000113196	ENSG00000113196
GLI3	GLI family zinc finger 3	ENSG00000106571	ENSG00000106571
DYRK1B	dual-specificity tyrosine-(Y)-phosphorylation regulated kinase 1B	ENSG00000105204	ENSG00000105204
SMAD3	SMAD family member 3	ENSG00000166949	ENSG00000166949
NOS1	nitric oxide synthase 1 (neuronal)	ENSG00000089250	ENSG00000089250
SOX6	SRY (sex determining region Y)-box 6	ENSG00000110693	ENSG00000110693
CIITA	class II, major histocompatibility complex, transactivator	ENSG00000179583	ENSG00000179583
PDX1	pancreatic and duodenal homeobox 1	ENSG00000139515	ENSG00000139515
TBX5	T-box 5	ENSG00000089225	ENSG00000089225
ATF4	activating transcription factor 4	ENSG00000128272	ENSG00000128272
RNF4	ring finger protein 4	ENSG00000063978	ENSG00000063978
SOX9	SRY (sex determining region Y)-box 9	ENSG00000125398	ENSG00000125398
FOXP1	forkhead box P1	ENSG00000114861	ENSG00000114861
IRF4	interferon regulatory factor 4	ENSG00000137265	ENSG00000137265
GLI2	GLI family zinc finger 2	ENSG00000074047	ENSG00000074047
RAN	RAN, member RAS oncogene family	ENSG00000132341	ENSG00000132341
ACVRL1	activin A receptor type II-like 1	ENSG00000139567	ENSG00000139567
FOXK1	forkhead box K1	ENSG00000164916	ENSG00000164916
IKZF1	IKAROS family zinc finger 1 (Ikaros)	ENSG00000185811	ENSG00000185811
BMP7	bone morphogenetic protein 7	ENSG00000101144	ENSG00000101144
HNF1B	HNF1 homeobox B	ENSG00000108753	ENSG00000108753
AR	androgen receptor	ENSG00000169083	ENSG00000169083
BMPR1A	bone morphogenetic protein receptor, type IA	ENSG00000107779	ENSG00000107779
GATA4	GATA binding protein 4	ENSG00000136574	ENSG00000136574
CEBPA	CCAAT/enhancer binding protein (C/EBP), alpha	ENSG00000245848	ENSG00000245848
MYOD1	myogenic differentiation 1	ENSG00000129152	ENSG00000129152
FZD4	frizzled family receptor 4	ENSG00000174804	ENSG00000174804
NOTCH1	notch 1	ENSG00000148400	ENSG00000148400
TBL1XR1	transducin (beta)-like 1 X-linked receptor 1	ENSG00000177565	ENSG00000177565
NR5A2	nuclear receptor subfamily 5, group A, member 2	ENSG00000116833	ENSG00000116833
SHH	sonic hedgehog	ENSG00000164690	ENSG00000164690
SALL1	spalt-like transcription factor 1	ENSG00000103449	ENSG00000103449
BLM	Bloom syndrome, RecQ helicase-like	ENSG00000197299	ENSG00000197299
TBX3	T-box 3	ENSG00000135111	ENSG00000135111
CREBBP	CREB binding protein	ENSG00000005339	ENSG00000005339
HNF1A	HNF1 homeobox A	ENSG00000135100	ENSG00000135100
FOXO1	forkhead box O1	ENSG00000150907	ENSG00000150907
MESP1	mesoderm posterior 1 homolog (mouse)	ENSG00000166823	ENSG00000166823
NRIP1	nuclear receptor interacting protein 1	ENSG00000180530	ENSG00000180530
HDAC4	histone deacetylase 4	ENSG00000068024	ENSG00000068024
USF2	upstream transcription factor 2, c-fos interacting	ENSG00000105698	ENSG00000105698
DDX5	DEAD (Asp-Glu-Ala-Asp) box helicase 5	ENSG00000263077	ENSG00000263077
PRDM16	PR domain containing 16	ENSG00000142611	ENSG00000142611
GREM1	gremlin 1, DAN family BMP antagonist	ENSG00000166923	ENSG00000166923
GO:0007422	peripheral nervous system development	P	1.340850e-11	11/47	34
NRG1	neuregulin 1	ENSG00000157168	ENSG00000157168
ERBB3	v-erb-b2 avian erythroblastic leukemia viral oncogene homolog 3	ENSG00000065361	ENSG00000065361
CITED2	Cbp/p300-interacting transactivator, with Glu/Asp-rich carboxy-terminal domain, 2	ENSG00000164442	ENSG00000164442
FOXD2	forkhead box D2	ENSG00000186564	ENSG00000186564
NTF3	neurotrophin 3	ENSG00000185652	ENSG00000185652
FOXD3	forkhead box D3	ENSG00000187140	ENSG00000187140
RXRG	retinoid X receptor, gamma	ENSG00000143171	ENSG00000143171
FOXD4L1	forkhead box D4-like 1	ENSG00000184492	ENSG00000184492
OSM	oncostatin M	ENSG00000099985	ENSG00000099985
GDNF	glial cell derived neurotrophic factor	ENSG00000168621	ENSG00000168621
EDNRB	endothelin receptor type B	ENSG00000136160	ENSG00000136160
GO:0001501	skeletal system development	P	1.381706e-11	17/152	35
TGFB2	transforming growth factor, beta 2	ENSG00000092969	ENSG00000092969
DLX5	distal-less homeobox 5	ENSG00000105880	ENSG00000105880
FRZB	frizzled-related protein	ENSG00000162998	ENSG00000162998
HOXA11	homeobox A11	ENSG00000005073	ENSG00000005073
FGFR1	fibroblast growth factor receptor 1	ENSG00000077782	ENSG00000077782
TP63	tumor protein p63	ENSG00000073282	ENSG00000073282
SMAD3	SMAD family member 3	ENSG00000166949	ENSG00000166949
SOX9	SRY (sex determining region Y)-box 9	ENSG00000125398	ENSG00000125398
JAG2	jagged 2	ENSG00000184916	ENSG00000184916
GLI2	GLI family zinc finger 2	ENSG00000074047	ENSG00000074047
EXT1	exostosin glycosyltransferase 1	ENSG00000182197	ENSG00000182197
BMP7	bone morphogenetic protein 7	ENSG00000101144	ENSG00000101144
RECQL4	RecQ protein-like 4	ENSG00000160957	ENSG00000160957
TBX3	T-box 3	ENSG00000135111	ENSG00000135111
BMP6	bone morphogenetic protein 6	ENSG00000153162	ENSG00000153162
INHA	inhibin, alpha	ENSG00000123999	ENSG00000123999
HDAC4	histone deacetylase 4	ENSG00000068024	ENSG00000068024
GO:0006468	protein amino acid phosphorylation	P	1.387146e-11	52/636	36
IKBKB	inhibitor of kappa light polypeptide gene enhancer in B-cells, kinase beta	ENSG00000104365	ENSG00000104365
TGFB2	transforming growth factor, beta 2	ENSG00000092969	ENSG00000092969
BRAF	v-raf murine sarcoma viral oncogene homolog B	ENSG00000157764	ENSG00000157764
ERBB3	v-erb-b2 avian erythroblastic leukemia viral oncogene homolog 3	ENSG00000065361	ENSG00000065361
PRKCB	protein kinase C, beta	ENSG00000166501	ENSG00000166501
MAP3K3	mitogen-activated protein kinase kinase kinase 3	ENSG00000198909	ENSG00000198909
KALRN	kalirin, RhoGEF kinase	ENSG00000160145	ENSG00000160145
IGF1R	insulin-like growth factor 1 receptor	ENSG00000140443	ENSG00000140443
IRAK2	interleukin-1 receptor-associated kinase 2	ENSG00000134070	ENSG00000134070
STK4	serine/threonine kinase 4	ENSG00000101109	ENSG00000101109
CDK6	cyclin-dependent kinase 6	ENSG00000105810	ENSG00000105810
DYRK1A	dual-specificity tyrosine-(Y)-phosphorylation regulated kinase 1A	ENSG00000157540	ENSG00000157540
INSR	insulin receptor	ENSG00000171105	ENSG00000171105
PKN1	protein kinase N1	ENSG00000123143	ENSG00000123143
CDK20	cyclin-dependent kinase 20	ENSG00000156345	ENSG00000156345
FYN	FYN oncogene related to SRC, FGR, YES	ENSG00000010810	ENSG00000010810
KDR	kinase insert domain receptor (a type III receptor tyrosine kinase)	ENSG00000128052	ENSG00000128052
RARA	retinoic acid receptor, alpha	ENSG00000131759	ENSG00000131759
FGFR1	fibroblast growth factor receptor 1	ENSG00000077782	ENSG00000077782
AMHR2	anti-Mullerian hormone receptor, type II	ENSG00000135409	ENSG00000135409
SMAD1	SMAD family member 1	ENSG00000170365	ENSG00000170365
MAPK15	mitogen-activated protein kinase 15	ENSG00000181085	ENSG00000181085
DYRK1B	dual-specificity tyrosine-(Y)-phosphorylation regulated kinase 1B	ENSG00000105204	ENSG00000105204
FGFR4	fibroblast growth factor receptor 4	ENSG00000160867	ENSG00000160867
NTRK1	neurotrophic tyrosine kinase, receptor, type 1	ENSG00000198400	ENSG00000198400
PRKACB	protein kinase, cAMP-dependent, catalytic, beta	ENSG00000142875	ENSG00000142875
ACVR1C	activin A receptor, type IC	ENSG00000123612	ENSG00000123612
SOX9	SRY (sex determining region Y)-box 9	ENSG00000125398	ENSG00000125398
EPHB1	EPH receptor B1	ENSG00000154928	ENSG00000154928
MARK4	MAP/microtubule affinity-regulating kinase 4	ENSG00000007047	ENSG00000007047
OBSCN	obscurin, cytoskeletal calmodulin and titin-interacting RhoGEF	ENSG00000154358	ENSG00000154358
ACVRL1	activin A receptor type II-like 1	ENSG00000139567	ENSG00000139567
FGFR2	fibroblast growth factor receptor 2	ENSG00000066468	ENSG00000066468
MYLK	myosin light chain kinase	ENSG00000065534	ENSG00000065534
RPS6KA2	ribosomal protein S6 kinase, 90kDa, polypeptide 2	ENSG00000071242	ENSG00000071242
PRKAR1B	protein kinase, cAMP-dependent, regulatory, type I, beta	ENSG00000188191	ENSG00000188191
ATM	ataxia telangiectasia mutated	ENSG00000149311	ENSG00000149311
BMPR1A	bone morphogenetic protein receptor, type IA	ENSG00000107779	ENSG00000107779
CDC42BPB	CDC42 binding protein kinase beta (DMPK-like)	ENSG00000198752	ENSG00000198752
PDGFRB	platelet-derived growth factor receptor, beta polypeptide	ENSG00000113721	ENSG00000113721
PRKCZ	protein kinase C, zeta	ENSG00000067606	ENSG00000067606
MYOD1	myogenic differentiation 1	ENSG00000129152	ENSG00000129152
CCL5	chemokine (C-C motif) ligand 5	ENSG00000161570	ENSG00000161570
PAK2	p21 protein (Cdc42/Rac)-activated kinase 2	ENSG00000180370	ENSG00000180370
CSK	c-src tyrosine kinase	ENSG00000103653	ENSG00000103653
MAPK10	mitogen-activated protein kinase 10	ENSG00000109339	ENSG00000109339
AKT1	v-akt murine thymoma viral oncogene homolog 1	ENSG00000142208	ENSG00000142208
EPHB2	EPH receptor B2	ENSG00000133216	ENSG00000133216
EPHA7	EPH receptor A7	ENSG00000135333	ENSG00000135333
PDGFRA	platelet-derived growth factor receptor, alpha polypeptide	ENSG00000134853	ENSG00000134853
CDK5	cyclin-dependent kinase 5	ENSG00000164885	ENSG00000164885
PTK2	protein tyrosine kinase 2	ENSG00000169398	ENSG00000169398
GO:0001657	ureteric bud development	P	1.443690e-11	15/46	37
ROBO2	roundabout, axon guidance receptor, homolog 2 (Drosophila)	ENSG00000185008	ENSG00000185008
SMAD6	SMAD family member 6	ENSG00000137834	ENSG00000137834
RARA	retinoic acid receptor, alpha	ENSG00000131759	ENSG00000131759
SFRP1	secreted frizzled-related protein 1	ENSG00000104332	ENSG00000104332
FGFR1	fibroblast growth factor receptor 1	ENSG00000077782	ENSG00000077782
SMAD1	SMAD family member 1	ENSG00000170365	ENSG00000170365
WT1	Wilms tumor 1	ENSG00000184937	ENSG00000184937
SMAD3	SMAD family member 3	ENSG00000166949	ENSG00000166949
FGFR2	fibroblast growth factor receptor 2	ENSG00000066468	ENSG00000066468
BMP7	bone morphogenetic protein 7	ENSG00000101144	ENSG00000101144
TSHZ3	teashirt zinc finger homeobox 3	ENSG00000121297	ENSG00000121297
SDC1	syndecan 1	ENSG00000115884	ENSG00000115884
SALL1	spalt-like transcription factor 1	ENSG00000103449	ENSG00000103449
BDNF	brain-derived neurotrophic factor	ENSG00000176697	ENSG00000176697
GDNF	glial cell derived neurotrophic factor	ENSG00000168621	ENSG00000168621
GO:0003705	RNA polymerase II transcription factor activity, enhancer binding	F	1.485545e-11	22/97	38
NKX2-5	NK2 homeobox 5	ENSG00000183072	ENSG00000183072
ZFHX3	zinc finger homeobox 3	ENSG00000140836	ENSG00000140836
MEF2C	myocyte enhancer factor 2C	ENSG00000081189	ENSG00000081189
FOXD2	forkhead box D2	ENSG00000186564	ENSG00000186564
FOXM1	forkhead box M1	ENSG00000111206	ENSG00000111206
FOXD3	forkhead box D3	ENSG00000187140	ENSG00000187140
FOXA2	forkhead box A2	ENSG00000125798	ENSG00000125798
FOXQ1	forkhead box Q1	ENSG00000164379	ENSG00000164379
NKX2-1	NK2 homeobox 1	ENSG00000136352	ENSG00000136352
MYF5	myogenic factor 5	ENSG00000111049	ENSG00000111049
SOX9	SRY (sex determining region Y)-box 9	ENSG00000125398	ENSG00000125398
FOXP1	forkhead box P1	ENSG00000114861	ENSG00000114861
FOXI2	forkhead box I2	ENSG00000186766	ENSG00000186766
HNF1B	HNF1 homeobox B	ENSG00000108753	ENSG00000108753
GATA4	GATA binding protein 4	ENSG00000136574	ENSG00000136574
CEBPA	CCAAT/enhancer binding protein (C/EBP), alpha	ENSG00000245848	ENSG00000245848
FOXE3	forkhead box E3	ENSG00000186790	ENSG00000186790
MYOD1	myogenic differentiation 1	ENSG00000129152	ENSG00000129152
NR5A2	nuclear receptor subfamily 5, group A, member 2	ENSG00000116833	ENSG00000116833
FOXD4L1	forkhead box D4-like 1	ENSG00000184492	ENSG00000184492
USF2	upstream transcription factor 2, c-fos interacting	ENSG00000105698	ENSG00000105698
FOXA1	forkhead box A1	ENSG00000129514	ENSG00000129514
GO:0090090	negative regulation of canonical Wnt receptor signaling pathway	P	1.546940e-11	14/83	39
NKX2-5	NK2 homeobox 5	ENSG00000183072	ENSG00000183072
WNT4	wingless-type MMTV integration site family, member 4	ENSG00000162552	ENSG00000162552
STK4	serine/threonine kinase 4	ENSG00000101109	ENSG00000101109
CDH1	cadherin 1, type 1, E-cadherin (epithelial)	ENSG00000039068	ENSG00000039068
FRZB	frizzled-related protein	ENSG00000162998	ENSG00000162998
SFRP4	secreted frizzled-related protein 4	ENSG00000106483	ENSG00000106483
AXIN1	axin 1	ENSG00000103126	ENSG00000103126
SFRP1	secreted frizzled-related protein 1	ENSG00000104332	ENSG00000104332
GLI3	GLI family zinc finger 3	ENSG00000106571	ENSG00000106571
TCF7L2	transcription factor 7-like 2 (T-cell specific, HMG-box)	ENSG00000148737	ENSG00000148737
SOX9	SRY (sex determining region Y)-box 9	ENSG00000125398	ENSG00000125398
NOTCH1	notch 1	ENSG00000148400	ENSG00000148400
SHH	sonic hedgehog	ENSG00000164690	ENSG00000164690
GREM1	gremlin 1, DAN family BMP antagonist	ENSG00000166923	ENSG00000166923
GO:0019899	enzyme binding	F	1.607914e-11	33/274	40
ZFHX3	zinc finger homeobox 3	ENSG00000140836	ENSG00000140836
SNCA	synuclein, alpha (non A4 component of amyloid precursor)	ENSG00000145335	ENSG00000145335
ACSL6	acyl-CoA synthetase long-chain family member 6	ENSG00000164398	ENSG00000164398
NOD2	nucleotide-binding oligomerization domain containing 2	ENSG00000167207	ENSG00000167207
RYR2	ryanodine receptor 2 (cardiac)	ENSG00000198626	ENSG00000198626
NFKBIA	nuclear factor of kappa light polypeptide gene enhancer in B-cells inhibitor, alpha	ENSG00000100906	ENSG00000100906
RARA	retinoic acid receptor, alpha	ENSG00000131759	ENSG00000131759
DYNLL1	dynein, light chain, LC8-type 1	ENSG00000088986	ENSG00000088986
AXIN1	axin 1	ENSG00000103126	ENSG00000103126
HMOX1	heme oxygenase (decycling) 1	ENSG00000100292	ENSG00000100292
CYP1A1	cytochrome P450, family 1, subfamily A, polypeptide 1	ENSG00000140465	ENSG00000140465
GRIN1	glutamate receptor, ionotropic, N-methyl D-aspartate 1	ENSG00000176884	ENSG00000176884
HAND1	heart and neural crest derivatives expressed 1	ENSG00000113196	ENSG00000113196
SMAD3	SMAD family member 3	ENSG00000166949	ENSG00000166949
UGT1A3	UDP glucuronosyltransferase 1 family, polypeptide A3	ENSG00000243135	ENSG00000243135
CBS	cystathionine-beta-synthase	ENSG00000160200	ENSG00000160200
ALB	albumin	ENSG00000163631	ENSG00000163631
EGLN1	egl-9 family hypoxia-inducible factor 1	ENSG00000135766	ENSG00000135766
UGT1A10	UDP glucuronosyltransferase 1 family, polypeptide A10	ENSG00000242515	ENSG00000242515
STUB1	STIP1 homology and U-box containing protein 1, E3 ubiquitin protein ligase	ENSG00000103266	ENSG00000103266
AR	androgen receptor	ENSG00000169083	ENSG00000169083
MYOD1	myogenic differentiation 1	ENSG00000129152	ENSG00000129152
UGT1A6	UDP glucuronosyltransferase 1 family, polypeptide A6	ENSG00000167165	ENSG00000167165
MAPT	microtubule-associated protein tau	ENSG00000186868	ENSG00000186868
NOTCH1	notch 1	ENSG00000148400	ENSG00000148400
UGT1A7	UDP glucuronosyltransferase 1 family, polypeptide A7	ENSG00000244122	ENSG00000244122
UGT1A9	UDP glucuronosyltransferase 1 family, polypeptide A9	ENSG00000241119	ENSG00000241119
THRB	thyroid hormone receptor, beta	ENSG00000151090	ENSG00000151090
AKT1	v-akt murine thymoma viral oncogene homolog 1	ENSG00000142208	ENSG00000142208
UGT1A4	UDP glucuronosyltransferase 1 family, polypeptide A4	ENSG00000244474	ENSG00000244474
CYP2C19	cytochrome P450, family 2, subfamily C, polypeptide 19	ENSG00000165841	ENSG00000165841
UGT1A8	UDP glucuronosyltransferase 1 family, polypeptide A8	ENSG00000241635	ENSG00000241635
DDX5	DEAD (Asp-Glu-Ala-Asp) box helicase 5	ENSG00000263077	ENSG00000263077
GO:0070374	positive regulation of ERK1 and ERK2 cascade	P	1.621103e-11	19/104	41
BRAF	v-raf murine sarcoma viral oncogene homolog B	ENSG00000157764	ENSG00000157764
NOD2	nucleotide-binding oligomerization domain containing 2	ENSG00000167207	ENSG00000167207
EDNRA	endothelin receptor type A	ENSG00000151617	ENSG00000151617
CD74	CD74 molecule, major histocompatibility complex, class II invariant chain	ENSG00000019582	ENSG00000019582
KDR	kinase insert domain receptor (a type III receptor tyrosine kinase)	ENSG00000128052	ENSG00000128052
RARA	retinoic acid receptor, alpha	ENSG00000131759	ENSG00000131759
SPRY2	sprouty homolog 2 (Drosophila)	ENSG00000136158	ENSG00000136158
FGFR4	fibroblast growth factor receptor 4	ENSG00000160867	ENSG00000160867
NTRK1	neurotrophic tyrosine kinase, receptor, type 1	ENSG00000198400	ENSG00000198400
OPRM1	opioid receptor, mu 1	ENSG00000112038	ENSG00000112038
HTR2C	5-hydroxytryptamine (serotonin) receptor 2C, G protein-coupled	ENSG00000147246	ENSG00000147246
ADRA1A	adrenoceptor alpha 1A	ENSG00000120907	ENSG00000120907
FGFR2	fibroblast growth factor receptor 2	ENSG00000066468	ENSG00000066468
NOD1	nucleotide-binding oligomerization domain containing 1	ENSG00000106100	ENSG00000106100
NODAL	nodal growth differentiation factor	ENSG00000156574	ENSG00000156574
PDGFRB	platelet-derived growth factor receptor, beta polypeptide	ENSG00000113721	ENSG00000113721
PRKCZ	protein kinase C, zeta	ENSG00000067606	ENSG00000067606
DRD2	dopamine receptor D2	ENSG00000149295	ENSG00000149295
PDGFRA	platelet-derived growth factor receptor, alpha polypeptide	ENSG00000134853	ENSG00000134853
GO:0042127	regulation of cell proliferation	P	1.711209e-11	24/163	42
PBX1	pre-B-cell leukemia homeobox 1	ENSG00000185630	ENSG00000185630
WNT7A	wingless-type MMTV integration site family, member 7A	ENSG00000154764	ENSG00000154764
LAMA5	laminin, alpha 5	ENSG00000130702	ENSG00000130702
ERBB3	v-erb-b2 avian erythroblastic leukemia viral oncogene homolog 3	ENSG00000065361	ENSG00000065361
ASCL1	achaete-scute family bHLH transcription factor 1	ENSG00000139352	ENSG00000139352
FOXM1	forkhead box M1	ENSG00000111206	ENSG00000111206
NFKBIA	nuclear factor of kappa light polypeptide gene enhancer in B-cells inhibitor, alpha	ENSG00000100906	ENSG00000100906
CHST11	carbohydrate (chondroitin 4) sulfotransferase 11	ENSG00000171310	ENSG00000171310
ARHGEF2	Rho/Rac guanine nucleotide exchange factor (GEF) 2	ENSG00000116584	ENSG00000116584
FGFR1	fibroblast growth factor receptor 1	ENSG00000077782	ENSG00000077782
BCL6	B-cell CLL/lymphoma 6	ENSG00000113916	ENSG00000113916
GLI3	GLI family zinc finger 3	ENSG00000106571	ENSG00000106571
PDX1	pancreatic and duodenal homeobox 1	ENSG00000139515	ENSG00000139515
SOX9	SRY (sex determining region Y)-box 9	ENSG00000125398	ENSG00000125398
JAG2	jagged 2	ENSG00000184916	ENSG00000184916
FGFR2	fibroblast growth factor receptor 2	ENSG00000066468	ENSG00000066468
CEBPA	CCAAT/enhancer binding protein (C/EBP), alpha	ENSG00000245848	ENSG00000245848
GHRL	ghrelin/obestatin prepropeptide	ENSG00000157017	ENSG00000157017
NR5A2	nuclear receptor subfamily 5, group A, member 2	ENSG00000116833	ENSG00000116833
SHH	sonic hedgehog	ENSG00000164690	ENSG00000164690
TBX3	T-box 3	ENSG00000135111	ENSG00000135111
FOXO1	forkhead box O1	ENSG00000150907	ENSG00000150907
INHA	inhibin, alpha	ENSG00000123999	ENSG00000123999
PTK2	protein tyrosine kinase 2	ENSG00000169398	ENSG00000169398
GO:0016477	cell migration	P	1.775580e-11	20/150	43
NRG1	neuregulin 1	ENSG00000157168	ENSG00000157168
TGFB2	transforming growth factor, beta 2	ENSG00000092969	ENSG00000092969
LAMA5	laminin, alpha 5	ENSG00000130702	ENSG00000130702
BCAR1	breast cancer anti-estrogen resistance 1	ENSG00000050820	ENSG00000050820
VAV2	vav 2 guanine nucleotide exchange factor	ENSG00000160293	ENSG00000160293
HES1	hes family bHLH transcription factor 1	ENSG00000114315	ENSG00000114315
KDR	kinase insert domain receptor (a type III receptor tyrosine kinase)	ENSG00000128052	ENSG00000128052
FGFR1	fibroblast growth factor receptor 1	ENSG00000077782	ENSG00000077782
VAV3	vav 3 guanine nucleotide exchange factor	ENSG00000134215	ENSG00000134215
FGFR4	fibroblast growth factor receptor 4	ENSG00000160867	ENSG00000160867
NRP1	neuropilin 1	ENSG00000099250	ENSG00000099250
NODAL	nodal growth differentiation factor	ENSG00000156574	ENSG00000156574
ANG	angiogenin, ribonuclease, RNase A family, 5	ENSG00000214274	ENSG00000214274
CDC42BPB	CDC42 binding protein kinase beta (DMPK-like)	ENSG00000198752	ENSG00000198752
PDGFRB	platelet-derived growth factor receptor, beta polypeptide	ENSG00000113721	ENSG00000113721
PRKCZ	protein kinase C, zeta	ENSG00000067606	ENSG00000067606
RELN	reelin	ENSG00000189056	ENSG00000189056
PDGFRA	platelet-derived growth factor receptor, alpha polypeptide	ENSG00000134853	ENSG00000134853
CDK5	cyclin-dependent kinase 5	ENSG00000164885	ENSG00000164885
PTPRK	protein tyrosine phosphatase, receptor type, K	ENSG00000152894	ENSG00000152894
GO:0030335	positive regulation of cell migration	P	1.824585e-11	17/130	44
INS	insulin	ENSG00000254647	ENSG00000254647
BCAR1	breast cancer anti-estrogen resistance 1	ENSG00000050820	ENSG00000050820
IGF1R	insulin-like growth factor 1 receptor	ENSG00000140443	ENSG00000140443
INSR	insulin receptor	ENSG00000171105	ENSG00000171105
NTF3	neurotrophin 3	ENSG00000185652	ENSG00000185652
KDR	kinase insert domain receptor (a type III receptor tyrosine kinase)	ENSG00000128052	ENSG00000128052
SMAD3	SMAD family member 3	ENSG00000166949	ENSG00000166949
PDPN	podoplanin	ENSG00000162493	ENSG00000162493
ALOX12	arachidonate 12-lipoxygenase	ENSG00000108839	ENSG00000108839
MYLK	myosin light chain kinase	ENSG00000065534	ENSG00000065534
PDGFRB	platelet-derived growth factor receptor, beta polypeptide	ENSG00000113721	ENSG00000113721
CDH13	cadherin 13	ENSG00000140945	ENSG00000140945
CCL5	chemokine (C-C motif) ligand 5	ENSG00000161570	ENSG00000161570
NOTCH1	notch 1	ENSG00000148400	ENSG00000148400
FGF1	fibroblast growth factor 1 (acidic)	ENSG00000113578	ENSG00000113578
PDGFRA	platelet-derived growth factor receptor, alpha polypeptide	ENSG00000134853	ENSG00000134853
PTK2	protein tyrosine kinase 2	ENSG00000169398	ENSG00000169398
GO:0045944	positive regulation of transcription from RNA polymerase II promoter	P	1.863398e-11	88/811	45
INHBA	inhibin, beta A	ENSG00000122641	ENSG00000122641
NME1-NME2	NME1-NME2 readthrough	ENSG00000243678	ENSG00000243678
TP73	tumor protein p73	ENSG00000078900	ENSG00000078900
IKBKB	inhibitor of kappa light polypeptide gene enhancer in B-cells, kinase beta	ENSG00000104365	ENSG00000104365
AIRE	autoimmune regulator	ENSG00000160224	ENSG00000160224
RARG	retinoic acid receptor, gamma	ENSG00000172819	ENSG00000172819
PBX1	pre-B-cell leukemia homeobox 1	ENSG00000185630	ENSG00000185630
WNT7A	wingless-type MMTV integration site family, member 7A	ENSG00000154764	ENSG00000154764
IL4	interleukin 4	ENSG00000113520	ENSG00000113520
NKX2-5	NK2 homeobox 5	ENSG00000183072	ENSG00000183072
MLXIPL	MLX interacting protein-like	ENSG00000009950	ENSG00000009950
CITED2	Cbp/p300-interacting transactivator, with Glu/Asp-rich carboxy-terminal domain, 2	ENSG00000164442	ENSG00000164442
MEF2C	myocyte enhancer factor 2C	ENSG00000081189	ENSG00000081189
NOD2	nucleotide-binding oligomerization domain containing 2	ENSG00000167207	ENSG00000167207
FOXD2	forkhead box D2	ENSG00000186564	ENSG00000186564
ASCL1	achaete-scute family bHLH transcription factor 1	ENSG00000139352	ENSG00000139352
TNKS	tankyrase, TRF1-interacting ankyrin-related ADP-ribose polymerase	ENSG00000173273	ENSG00000173273
FOXM1	forkhead box M1	ENSG00000111206	ENSG00000111206
NTF3	neurotrophin 3	ENSG00000185652	ENSG00000185652
FOXD3	forkhead box D3	ENSG00000187140	ENSG00000187140
NFKBIA	nuclear factor of kappa light polypeptide gene enhancer in B-cells inhibitor, alpha	ENSG00000100906	ENSG00000100906
FOXA2	forkhead box A2	ENSG00000125798	ENSG00000125798
HES1	hes family bHLH transcription factor 1	ENSG00000114315	ENSG00000114315
DLX5	distal-less homeobox 5	ENSG00000105880	ENSG00000105880
RARA	retinoic acid receptor, alpha	ENSG00000131759	ENSG00000131759
ARHGEF2	Rho/Rac guanine nucleotide exchange factor (GEF) 2	ENSG00000116584	ENSG00000116584
RXRG	retinoid X receptor, gamma	ENSG00000143171	ENSG00000143171
LRP5	low density lipoprotein receptor-related protein 5	ENSG00000162337	ENSG00000162337
SMAD1	SMAD family member 1	ENSG00000170365	ENSG00000170365
TP63	tumor protein p63	ENSG00000073282	ENSG00000073282
GRIN1	glutamate receptor, ionotropic, N-methyl D-aspartate 1	ENSG00000176884	ENSG00000176884
WT1	Wilms tumor 1	ENSG00000184937	ENSG00000184937
HDAC5	histone deacetylase 5	ENSG00000108840	ENSG00000108840
NKX2-1	NK2 homeobox 1	ENSG00000136352	ENSG00000136352
HAND1	heart and neural crest derivatives expressed 1	ENSG00000113196	ENSG00000113196
GLI3	GLI family zinc finger 3	ENSG00000106571	ENSG00000106571
UBB	ubiquitin B	ENSG00000170315	ENSG00000170315
TCF7L2	transcription factor 7-like 2 (T-cell specific, HMG-box)	ENSG00000148737	ENSG00000148737
MSX1	msh homeobox 1	ENSG00000163132	ENSG00000163132
SMAD3	SMAD family member 3	ENSG00000166949	ENSG00000166949
NOS1	nitric oxide synthase 1 (neuronal)	ENSG00000089250	ENSG00000089250
SOX6	SRY (sex determining region Y)-box 6	ENSG00000110693	ENSG00000110693
CIITA	class II, major histocompatibility complex, transactivator	ENSG00000179583	ENSG00000179583
PDX1	pancreatic and duodenal homeobox 1	ENSG00000139515	ENSG00000139515
TBX5	T-box 5	ENSG00000089225	ENSG00000089225
MYF5	myogenic factor 5	ENSG00000111049	ENSG00000111049
ATF4	activating transcription factor 4	ENSG00000128272	ENSG00000128272
RNF4	ring finger protein 4	ENSG00000063978	ENSG00000063978
SOX9	SRY (sex determining region Y)-box 9	ENSG00000125398	ENSG00000125398
NR2F1	nuclear receptor subfamily 2, group F, member 1	ENSG00000175745	ENSG00000175745
FOXP1	forkhead box P1	ENSG00000114861	ENSG00000114861
IRF4	interferon regulatory factor 4	ENSG00000137265	ENSG00000137265
GLI2	GLI family zinc finger 2	ENSG00000074047	ENSG00000074047
ACVRL1	activin A receptor type II-like 1	ENSG00000139567	ENSG00000139567
FGFR2	fibroblast growth factor receptor 2	ENSG00000066468	ENSG00000066468
IKZF1	IKAROS family zinc finger 1 (Ikaros)	ENSG00000185811	ENSG00000185811
NODAL	nodal growth differentiation factor	ENSG00000156574	ENSG00000156574
BMP7	bone morphogenetic protein 7	ENSG00000101144	ENSG00000101144
HNF1B	HNF1 homeobox B	ENSG00000108753	ENSG00000108753
AR	androgen receptor	ENSG00000169083	ENSG00000169083
GATA4	GATA binding protein 4	ENSG00000136574	ENSG00000136574
CEBPA	CCAAT/enhancer binding protein (C/EBP), alpha	ENSG00000245848	ENSG00000245848
NME2	NME/NM23 nucleoside diphosphate kinase 2	ENSG00000011052	ENSG00000011052
MYOD1	myogenic differentiation 1	ENSG00000129152	ENSG00000129152
CDH13	cadherin 13	ENSG00000140945	ENSG00000140945
NOTCH1	notch 1	ENSG00000148400	ENSG00000148400
TBL1XR1	transducin (beta)-like 1 X-linked receptor 1	ENSG00000177565	ENSG00000177565
NR5A2	nuclear receptor subfamily 5, group A, member 2	ENSG00000116833	ENSG00000116833
SHH	sonic hedgehog	ENSG00000164690	ENSG00000164690
SALL1	spalt-like transcription factor 1	ENSG00000103449	ENSG00000103449
CREBBP	CREB binding protein	ENSG00000005339	ENSG00000005339
HNF1A	HNF1 homeobox A	ENSG00000135100	ENSG00000135100
BMP6	bone morphogenetic protein 6	ENSG00000153162	ENSG00000153162
FOXD4L1	forkhead box D4-like 1	ENSG00000184492	ENSG00000184492
DRD2	dopamine receptor D2	ENSG00000149295	ENSG00000149295
FOXO1	forkhead box O1	ENSG00000150907	ENSG00000150907
THRB	thyroid hormone receptor, beta	ENSG00000151090	ENSG00000151090
MESP1	mesoderm posterior 1 homolog (mouse)	ENSG00000166823	ENSG00000166823
NRIP1	nuclear receptor interacting protein 1	ENSG00000180530	ENSG00000180530
AKT1	v-akt murine thymoma viral oncogene homolog 1	ENSG00000142208	ENSG00000142208
HDAC4	histone deacetylase 4	ENSG00000068024	ENSG00000068024
OSM	oncostatin M	ENSG00000099985	ENSG00000099985
FGF1	fibroblast growth factor 1 (acidic)	ENSG00000113578	ENSG00000113578
USF2	upstream transcription factor 2, c-fos interacting	ENSG00000105698	ENSG00000105698
FOXA1	forkhead box A1	ENSG00000129514	ENSG00000129514
GDNF	glial cell derived neurotrophic factor	ENSG00000168621	ENSG00000168621
DDX5	DEAD (Asp-Glu-Ala-Asp) box helicase 5	ENSG00000263077	ENSG00000263077
GREM1	gremlin 1, DAN family BMP antagonist	ENSG00000166923	ENSG00000166923
GO:0048646	anatomical structure formation involved in morphogenesis	P	1.919132e-11	11/22	46
FOXA2	forkhead box A2	ENSG00000125798	ENSG00000125798
DLX5	distal-less homeobox 5	ENSG00000105880	ENSG00000105880
TP63	tumor protein p63	ENSG00000073282	ENSG00000073282
NKX2-1	NK2 homeobox 1	ENSG00000136352	ENSG00000136352
GLI3	GLI family zinc finger 3	ENSG00000106571	ENSG00000106571
GLI2	GLI family zinc finger 2	ENSG00000074047	ENSG00000074047
GRB2	growth factor receptor-bound protein 2	ENSG00000177885	ENSG00000177885
NODAL	nodal growth differentiation factor	ENSG00000156574	ENSG00000156574
BMP7	bone morphogenetic protein 7	ENSG00000101144	ENSG00000101144
SHH	sonic hedgehog	ENSG00000164690	ENSG00000164690
FOXA1	forkhead box A1	ENSG00000129514	ENSG00000129514
GO:0007507	heart development	P	1.995781e-11	33/200	47
NRG1	neuregulin 1	ENSG00000157168	ENSG00000157168
TGFB2	transforming growth factor, beta 2	ENSG00000092969	ENSG00000092969
HDAC9	histone deacetylase 9	ENSG00000048052	ENSG00000048052
BCOR	BCL6 corepressor	ENSG00000183337	ENSG00000183337
NKX2-5	NK2 homeobox 5	ENSG00000183072	ENSG00000183072
FOXL1	forkhead box L1	ENSG00000176678	ENSG00000176678
ERBB3	v-erb-b2 avian erythroblastic leukemia viral oncogene homolog 3	ENSG00000065361	ENSG00000065361
CITED2	Cbp/p300-interacting transactivator, with Glu/Asp-rich carboxy-terminal domain, 2	ENSG00000164442	ENSG00000164442
MEF2C	myocyte enhancer factor 2C	ENSG00000081189	ENSG00000081189
EDNRA	endothelin receptor type A	ENSG00000151617	ENSG00000151617
RXRG	retinoid X receptor, gamma	ENSG00000143171	ENSG00000143171
WT1	Wilms tumor 1	ENSG00000184937	ENSG00000184937
HDAC5	histone deacetylase 5	ENSG00000108840	ENSG00000108840
HAND1	heart and neural crest derivatives expressed 1	ENSG00000113196	ENSG00000113196
GLI3	GLI family zinc finger 3	ENSG00000106571	ENSG00000106571
NKX2-6	NK2 homeobox 6	ENSG00000180053	ENSG00000180053
MSX1	msh homeobox 1	ENSG00000163132	ENSG00000163132
TBX5	T-box 5	ENSG00000089225	ENSG00000089225
SOX9	SRY (sex determining region Y)-box 9	ENSG00000125398	ENSG00000125398
NRP1	neuropilin 1	ENSG00000099250	ENSG00000099250
FOXP1	forkhead box P1	ENSG00000114861	ENSG00000114861
TH	tyrosine hydroxylase	ENSG00000180176	ENSG00000180176
ID3	inhibitor of DNA binding 3, dominant negative helix-loop-helix protein	ENSG00000117318	ENSG00000117318
GLI2	GLI family zinc finger 2	ENSG00000074047	ENSG00000074047
RPS6KA2	ribosomal protein S6 kinase, 90kDa, polypeptide 2	ENSG00000071242	ENSG00000071242
NODAL	nodal growth differentiation factor	ENSG00000156574	ENSG00000156574
ATM	ataxia telangiectasia mutated	ENSG00000149311	ENSG00000149311
BMPR1A	bone morphogenetic protein receptor, type IA	ENSG00000107779	ENSG00000107779
GATA4	GATA binding protein 4	ENSG00000136574	ENSG00000136574
NOTCH1	notch 1	ENSG00000148400	ENSG00000148400
SHH	sonic hedgehog	ENSG00000164690	ENSG00000164690
SALL1	spalt-like transcription factor 1	ENSG00000103449	ENSG00000103449
MKKS	McKusick-Kaufman syndrome	ENSG00000125863	ENSG00000125863
GO:0048754	branching morphogenesis of a tube	P	2.004941e-11	10/34	48
LAMA5	laminin, alpha 5	ENSG00000130702	ENSG00000130702
WNT4	wingless-type MMTV integration site family, member 4	ENSG00000162552	ENSG00000162552
KDR	kinase insert domain receptor (a type III receptor tyrosine kinase)	ENSG00000128052	ENSG00000128052
SPRY2	sprouty homolog 2 (Drosophila)	ENSG00000136158	ENSG00000136158
GLI3	GLI family zinc finger 3	ENSG00000106571	ENSG00000106571
GLI2	GLI family zinc finger 2	ENSG00000074047	ENSG00000074047
BMP7	bone morphogenetic protein 7	ENSG00000101144	ENSG00000101144
HNF1B	HNF1 homeobox B	ENSG00000108753	ENSG00000108753
NOTCH1	notch 1	ENSG00000148400	ENSG00000148400
SHH	sonic hedgehog	ENSG00000164690	ENSG00000164690
GO:0016772	transferase activity, transferring phosphorus-containing groups	F	2.080747e-11	45/574	49
IKBKB	inhibitor of kappa light polypeptide gene enhancer in B-cells, kinase beta	ENSG00000104365	ENSG00000104365
BRAF	v-raf murine sarcoma viral oncogene homolog B	ENSG00000157764	ENSG00000157764
ERBB3	v-erb-b2 avian erythroblastic leukemia viral oncogene homolog 3	ENSG00000065361	ENSG00000065361
PRKCB	protein kinase C, beta	ENSG00000166501	ENSG00000166501
MAP3K3	mitogen-activated protein kinase kinase kinase 3	ENSG00000198909	ENSG00000198909
KALRN	kalirin, RhoGEF kinase	ENSG00000160145	ENSG00000160145
IGF1R	insulin-like growth factor 1 receptor	ENSG00000140443	ENSG00000140443
IRAK2	interleukin-1 receptor-associated kinase 2	ENSG00000134070	ENSG00000134070
STK4	serine/threonine kinase 4	ENSG00000101109	ENSG00000101109
CDK6	cyclin-dependent kinase 6	ENSG00000105810	ENSG00000105810
DYRK1A	dual-specificity tyrosine-(Y)-phosphorylation regulated kinase 1A	ENSG00000157540	ENSG00000157540
INSR	insulin receptor	ENSG00000171105	ENSG00000171105
PKN1	protein kinase N1	ENSG00000123143	ENSG00000123143
CDK20	cyclin-dependent kinase 20	ENSG00000156345	ENSG00000156345
FYN	FYN oncogene related to SRC, FGR, YES	ENSG00000010810	ENSG00000010810
KDR	kinase insert domain receptor (a type III receptor tyrosine kinase)	ENSG00000128052	ENSG00000128052
FGFR1	fibroblast growth factor receptor 1	ENSG00000077782	ENSG00000077782
AMHR2	anti-Mullerian hormone receptor, type II	ENSG00000135409	ENSG00000135409
MAPK15	mitogen-activated protein kinase 15	ENSG00000181085	ENSG00000181085
DYRK1B	dual-specificity tyrosine-(Y)-phosphorylation regulated kinase 1B	ENSG00000105204	ENSG00000105204
FGFR4	fibroblast growth factor receptor 4	ENSG00000160867	ENSG00000160867
NTRK1	neurotrophic tyrosine kinase, receptor, type 1	ENSG00000198400	ENSG00000198400
PRKACB	protein kinase, cAMP-dependent, catalytic, beta	ENSG00000142875	ENSG00000142875
ACVR1C	activin A receptor, type IC	ENSG00000123612	ENSG00000123612
EPHB1	EPH receptor B1	ENSG00000154928	ENSG00000154928
MARK4	MAP/microtubule affinity-regulating kinase 4	ENSG00000007047	ENSG00000007047
OBSCN	obscurin, cytoskeletal calmodulin and titin-interacting RhoGEF	ENSG00000154358	ENSG00000154358
ACVRL1	activin A receptor type II-like 1	ENSG00000139567	ENSG00000139567
FGFR2	fibroblast growth factor receptor 2	ENSG00000066468	ENSG00000066468
MYLK	myosin light chain kinase	ENSG00000065534	ENSG00000065534
RPS6KA2	ribosomal protein S6 kinase, 90kDa, polypeptide 2	ENSG00000071242	ENSG00000071242
ATM	ataxia telangiectasia mutated	ENSG00000149311	ENSG00000149311
BMPR1A	bone morphogenetic protein receptor, type IA	ENSG00000107779	ENSG00000107779
CDC42BPB	CDC42 binding protein kinase beta (DMPK-like)	ENSG00000198752	ENSG00000198752
PDGFRB	platelet-derived growth factor receptor, beta polypeptide	ENSG00000113721	ENSG00000113721
PRKCZ	protein kinase C, zeta	ENSG00000067606	ENSG00000067606
PAK2	p21 protein (Cdc42/Rac)-activated kinase 2	ENSG00000180370	ENSG00000180370
CSK	c-src tyrosine kinase	ENSG00000103653	ENSG00000103653
MAPK10	mitogen-activated protein kinase 10	ENSG00000109339	ENSG00000109339
AKT1	v-akt murine thymoma viral oncogene homolog 1	ENSG00000142208	ENSG00000142208
EPHB2	EPH receptor B2	ENSG00000133216	ENSG00000133216
EPHA7	EPH receptor A7	ENSG00000135333	ENSG00000135333
PDGFRA	platelet-derived growth factor receptor, alpha polypeptide	ENSG00000134853	ENSG00000134853
CDK5	cyclin-dependent kinase 5	ENSG00000164885	ENSG00000164885
PTK2	protein tyrosine kinase 2	ENSG00000169398	ENSG00000169398
GO:0001889	liver development	P	2.163258e-11	18/86	50
CADM1	cell adhesion molecule 1	ENSG00000182985	ENSG00000182985
CITED2	Cbp/p300-interacting transactivator, with Glu/Asp-rich carboxy-terminal domain, 2	ENSG00000164442	ENSG00000164442
WNT4	wingless-type MMTV integration site family, member 4	ENSG00000162552	ENSG00000162552
FOXM1	forkhead box M1	ENSG00000111206	ENSG00000111206
HES1	hes family bHLH transcription factor 1	ENSG00000114315	ENSG00000114315
RARA	retinoic acid receptor, alpha	ENSG00000131759	ENSG00000131759
ALDH9A1	aldehyde dehydrogenase 9 family, member A1	ENSG00000143149	ENSG00000143149
CYP1A1	cytochrome P450, family 1, subfamily A, polypeptide 1	ENSG00000140465	ENSG00000140465
SMAD3	SMAD family member 3	ENSG00000166949	ENSG00000166949
PCSK9	proprotein convertase subtilisin/kexin type 9	ENSG00000169174	ENSG00000169174
PDX1	pancreatic and duodenal homeobox 1	ENSG00000139515	ENSG00000139515
ASNS	asparagine synthetase (glutamine-hydrolyzing)	ENSG00000070669	ENSG00000070669
NODAL	nodal growth differentiation factor	ENSG00000156574	ENSG00000156574
HNF1B	HNF1 homeobox B	ENSG00000108753	ENSG00000108753
CEBPA	CCAAT/enhancer binding protein (C/EBP), alpha	ENSG00000245848	ENSG00000245848
NOTCH1	notch 1	ENSG00000148400	ENSG00000148400
HNF1A	HNF1 homeobox A	ENSG00000135100	ENSG00000135100
UGT1A8	UDP glucuronosyltransferase 1 family, polypeptide A8	ENSG00000241635	ENSG00000241635
GO:0007267	cell-cell signaling	P	2.231704e-11	24/270	51
INHBA	inhibin, beta A	ENSG00000122641	ENSG00000122641
TGFB2	transforming growth factor, beta 2	ENSG00000092969	ENSG00000092969
INS	insulin	ENSG00000254647	ENSG00000254647
ASH1L	ash1 (absent, small, or homeotic)-like (Drosophila)	ENSG00000116539	ENSG00000116539
WNT7B	wingless-type MMTV integration site family, member 7B	ENSG00000188064	ENSG00000188064
WNT4	wingless-type MMTV integration site family, member 4	ENSG00000162552	ENSG00000162552
EDN3	endothelin 3	ENSG00000124205	ENSG00000124205
NTF3	neurotrophin 3	ENSG00000185652	ENSG00000185652
ADORA1	adenosine A1 receptor	ENSG00000163485	ENSG00000163485
GHRH	growth hormone releasing hormone	ENSG00000118702	ENSG00000118702
TAC1	tachykinin, precursor 1	ENSG00000006128	ENSG00000006128
TBX5	T-box 5	ENSG00000089225	ENSG00000089225
NRP1	neuropilin 1	ENSG00000099250	ENSG00000099250
FADS1	fatty acid desaturase 1	ENSG00000149485	ENSG00000149485
ADRA1A	adrenoceptor alpha 1A	ENSG00000120907	ENSG00000120907
FGFR2	fibroblast growth factor receptor 2	ENSG00000066468	ENSG00000066468
GRB2	growth factor receptor-bound protein 2	ENSG00000177885	ENSG00000177885
HCN2	hyperpolarization activated cyclic nucleotide-gated potassium channel 2	ENSG00000099822	ENSG00000099822
AR	androgen receptor	ENSG00000169083	ENSG00000169083
GATA4	GATA binding protein 4	ENSG00000136574	ENSG00000136574
CCL5	chemokine (C-C motif) ligand 5	ENSG00000161570	ENSG00000161570
SHH	sonic hedgehog	ENSG00000164690	ENSG00000164690
INHA	inhibin, alpha	ENSG00000123999	ENSG00000123999
GREM1	gremlin 1, DAN family BMP antagonist	ENSG00000166923	ENSG00000166923
GO:0000122	negative regulation of transcription from RNA polymerase II promoter	P	2.392186e-11	66/623	52
TP73	tumor protein p73	ENSG00000078900	ENSG00000078900
RARG	retinoic acid receptor, gamma	ENSG00000172819	ENSG00000172819
HDAC9	histone deacetylase 9	ENSG00000048052	ENSG00000048052
BCOR	BCL6 corepressor	ENSG00000183337	ENSG00000183337
NKX2-5	NK2 homeobox 5	ENSG00000183072	ENSG00000183072
ZFHX3	zinc finger homeobox 3	ENSG00000140836	ENSG00000140836
UBE2D3	ubiquitin-conjugating enzyme E2D 3	ENSG00000109332	ENSG00000109332
MLXIPL	MLX interacting protein-like	ENSG00000009950	ENSG00000009950
CITED2	Cbp/p300-interacting transactivator, with Glu/Asp-rich carboxy-terminal domain, 2	ENSG00000164442	ENSG00000164442
MEF2C	myocyte enhancer factor 2C	ENSG00000081189	ENSG00000081189
NR2F2	nuclear receptor subfamily 2, group F, member 2	ENSG00000185551	ENSG00000185551
SKIL	SKI-like oncogene	ENSG00000136603	ENSG00000136603
FOXD2	forkhead box D2	ENSG00000186564	ENSG00000186564
FOXM1	forkhead box M1	ENSG00000111206	ENSG00000111206
FOXD3	forkhead box D3	ENSG00000187140	ENSG00000187140
FOXA2	forkhead box A2	ENSG00000125798	ENSG00000125798
HES1	hes family bHLH transcription factor 1	ENSG00000114315	ENSG00000114315
RARA	retinoic acid receptor, alpha	ENSG00000131759	ENSG00000131759
FGFR1	fibroblast growth factor receptor 1	ENSG00000077782	ENSG00000077782
MAPK15	mitogen-activated protein kinase 15	ENSG00000181085	ENSG00000181085
KDM2B	lysine (K)-specific demethylase 2B	ENSG00000089094	ENSG00000089094
TP63	tumor protein p63	ENSG00000073282	ENSG00000073282
WT1	Wilms tumor 1	ENSG00000184937	ENSG00000184937
FOXQ1	forkhead box Q1	ENSG00000164379	ENSG00000164379
BCL6	B-cell CLL/lymphoma 6	ENSG00000113916	ENSG00000113916
HDAC5	histone deacetylase 5	ENSG00000108840	ENSG00000108840
NKX2-1	NK2 homeobox 1	ENSG00000136352	ENSG00000136352
HAND1	heart and neural crest derivatives expressed 1	ENSG00000113196	ENSG00000113196
GLI3	GLI family zinc finger 3	ENSG00000106571	ENSG00000106571
UBB	ubiquitin B	ENSG00000170315	ENSG00000170315
TCF7L2	transcription factor 7-like 2 (T-cell specific, HMG-box)	ENSG00000148737	ENSG00000148737
MSX1	msh homeobox 1	ENSG00000163132	ENSG00000163132
SMAD3	SMAD family member 3	ENSG00000166949	ENSG00000166949
SOX6	SRY (sex determining region Y)-box 6	ENSG00000110693	ENSG00000110693
CIITA	class II, major histocompatibility complex, transactivator	ENSG00000179583	ENSG00000179583
PDX1	pancreatic and duodenal homeobox 1	ENSG00000139515	ENSG00000139515
NR2F1	nuclear receptor subfamily 2, group F, member 1	ENSG00000175745	ENSG00000175745
DNMT3A	DNA (cytosine-5-)-methyltransferase 3 alpha	ENSG00000119772	ENSG00000119772
ID3	inhibitor of DNA binding 3, dominant negative helix-loop-helix protein	ENSG00000117318	ENSG00000117318
VLDLR	very low density lipoprotein receptor	ENSG00000147852	ENSG00000147852
FOXI2	forkhead box I2	ENSG00000186766	ENSG00000186766
GLI2	GLI family zinc finger 2	ENSG00000074047	ENSG00000074047
FGFR2	fibroblast growth factor receptor 2	ENSG00000066468	ENSG00000066468
IKZF1	IKAROS family zinc finger 1 (Ikaros)	ENSG00000185811	ENSG00000185811
NODAL	nodal growth differentiation factor	ENSG00000156574	ENSG00000156574
HNF1B	HNF1 homeobox B	ENSG00000108753	ENSG00000108753
CEBPA	CCAAT/enhancer binding protein (C/EBP), alpha	ENSG00000245848	ENSG00000245848
FOXE3	forkhead box E3	ENSG00000186790	ENSG00000186790
NOTCH1	notch 1	ENSG00000148400	ENSG00000148400
TBL1XR1	transducin (beta)-like 1 X-linked receptor 1	ENSG00000177565	ENSG00000177565
SHH	sonic hedgehog	ENSG00000164690	ENSG00000164690
SALL1	spalt-like transcription factor 1	ENSG00000103449	ENSG00000103449
KCNIP3	Kv channel interacting protein 3, calsenilin	ENSG00000115041	ENSG00000115041
TBX3	T-box 3	ENSG00000135111	ENSG00000135111
CREBBP	CREB binding protein	ENSG00000005339	ENSG00000005339
HNF1A	HNF1 homeobox A	ENSG00000135100	ENSG00000135100
FOXD4L1	forkhead box D4-like 1	ENSG00000184492	ENSG00000184492
THRB	thyroid hormone receptor, beta	ENSG00000151090	ENSG00000151090
NRIP1	nuclear receptor interacting protein 1	ENSG00000180530	ENSG00000180530
FOXP2	forkhead box P2	ENSG00000128573	ENSG00000128573
HDAC4	histone deacetylase 4	ENSG00000068024	ENSG00000068024
NKX6-2	NK6 homeobox 2	ENSG00000148826	ENSG00000148826
FOXA1	forkhead box A1	ENSG00000129514	ENSG00000129514
DDX5	DEAD (Asp-Glu-Ala-Asp) box helicase 5	ENSG00000263077	ENSG00000263077
EDNRB	endothelin receptor type B	ENSG00000136160	ENSG00000136160
PRDM16	PR domain containing 16	ENSG00000142611	ENSG00000142611
GO:0030509	BMP signaling pathway	P	2.403611e-11	12/68	53
NKX2-5	NK2 homeobox 5	ENSG00000183072	ENSG00000183072
UBE2D3	ubiquitin-conjugating enzyme E2D 3	ENSG00000109332	ENSG00000109332
RYR2	ryanodine receptor 2 (cardiac)	ENSG00000198626	ENSG00000198626
SMAD6	SMAD family member 6	ENSG00000137834	ENSG00000137834
DLX5	distal-less homeobox 5	ENSG00000105880	ENSG00000105880
SMAD1	SMAD family member 1	ENSG00000170365	ENSG00000170365
MSX1	msh homeobox 1	ENSG00000163132	ENSG00000163132
ACVRL1	activin A receptor type II-like 1	ENSG00000139567	ENSG00000139567
BMP7	bone morphogenetic protein 7	ENSG00000101144	ENSG00000101144
BMPR1A	bone morphogenetic protein receptor, type IA	ENSG00000107779	ENSG00000107779
GATA4	GATA binding protein 4	ENSG00000136574	ENSG00000136574
BMP6	bone morphogenetic protein 6	ENSG00000153162	ENSG00000153162
GO:0005524	ATP binding	F	2.410694e-11	88/1661	54
NME1-NME2	NME1-NME2 readthrough	ENSG00000243678	ENSG00000243678
PFKFB1	6-phosphofructo-2-kinase/fructose-2,6-biphosphatase 1	ENSG00000158571	ENSG00000158571
IKBKB	inhibitor of kappa light polypeptide gene enhancer in B-cells, kinase beta	ENSG00000104365	ENSG00000104365
SPHK2	sphingosine kinase 2	ENSG00000063176	ENSG00000063176
UBE2D3	ubiquitin-conjugating enzyme E2D 3	ENSG00000109332	ENSG00000109332
BRAF	v-raf murine sarcoma viral oncogene homolog B	ENSG00000157764	ENSG00000157764
ERBB3	v-erb-b2 avian erythroblastic leukemia viral oncogene homolog 3	ENSG00000065361	ENSG00000065361
TOP3A	topoisomerase (DNA) III alpha	ENSG00000177302	ENSG00000177302
PRKCB	protein kinase C, beta	ENSG00000166501	ENSG00000166501
GART	phosphoribosylglycinamide formyltransferase, phosphoribosylglycinamide synthetase, phosphoribosylaminoimidazole synthetase	ENSG00000159131	ENSG00000159131
MAP3K3	mitogen-activated protein kinase kinase kinase 3	ENSG00000198909	ENSG00000198909
KALRN	kalirin, RhoGEF kinase	ENSG00000160145	ENSG00000160145
IGF1R	insulin-like growth factor 1 receptor	ENSG00000140443	ENSG00000140443
ACSL6	acyl-CoA synthetase long-chain family member 6	ENSG00000164398	ENSG00000164398
CHD1	chromodomain helicase DNA binding protein 1	ENSG00000153922	ENSG00000153922
IRAK2	interleukin-1 receptor-associated kinase 2	ENSG00000134070	ENSG00000134070
STK4	serine/threonine kinase 4	ENSG00000101109	ENSG00000101109
NOD2	nucleotide-binding oligomerization domain containing 2	ENSG00000167207	ENSG00000167207
ATP8B1	ATPase, aminophospholipid transporter, class I, type 8B, member 1	ENSG00000081923	ENSG00000081923
CDK6	cyclin-dependent kinase 6	ENSG00000105810	ENSG00000105810
DYRK1A	dual-specificity tyrosine-(Y)-phosphorylation regulated kinase 1A	ENSG00000157540	ENSG00000157540
INSR	insulin receptor	ENSG00000171105	ENSG00000171105
IGHMBP2	immunoglobulin mu binding protein 2	ENSG00000132740	ENSG00000132740
DHX57	DEAH (Asp-Glu-Ala-Asp/His) box polypeptide 57	ENSG00000163214	ENSG00000163214
PKN1	protein kinase N1	ENSG00000123143	ENSG00000123143
DCK	deoxycytidine kinase	ENSG00000156136	ENSG00000156136
CDK20	cyclin-dependent kinase 20	ENSG00000156345	ENSG00000156345
FYN	FYN oncogene related to SRC, FGR, YES	ENSG00000010810	ENSG00000010810
MYH7	myosin, heavy chain 7, cardiac muscle, beta	ENSG00000092054	ENSG00000092054
KDR	kinase insert domain receptor (a type III receptor tyrosine kinase)	ENSG00000128052	ENSG00000128052
FGFR1	fibroblast growth factor receptor 1	ENSG00000077782	ENSG00000077782
AMHR2	anti-Mullerian hormone receptor, type II	ENSG00000135409	ENSG00000135409
MAPK15	mitogen-activated protein kinase 15	ENSG00000181085	ENSG00000181085
DYRK1B	dual-specificity tyrosine-(Y)-phosphorylation regulated kinase 1B	ENSG00000105204	ENSG00000105204
SRR	serine racemase	ENSG00000167720	ENSG00000167720
FGFR4	fibroblast growth factor receptor 4	ENSG00000160867	ENSG00000160867
CARS	cysteinyl-tRNA synthetase	ENSG00000110619	ENSG00000110619
NTRK1	neurotrophic tyrosine kinase, receptor, type 1	ENSG00000198400	ENSG00000198400
CIITA	class II, major histocompatibility complex, transactivator	ENSG00000179583	ENSG00000179583
PRKACB	protein kinase, cAMP-dependent, catalytic, beta	ENSG00000142875	ENSG00000142875
ACVR1C	activin A receptor, type IC	ENSG00000123612	ENSG00000123612
EIF4A3	eukaryotic translation initiation factor 4A3	ENSG00000141543	ENSG00000141543
DNA2	DNA replication helicase/nuclease 2	ENSG00000138346	ENSG00000138346
EPHB1	EPH receptor B1	ENSG00000154928	ENSG00000154928
ASNS	asparagine synthetase (glutamine-hydrolyzing)	ENSG00000070669	ENSG00000070669
MARK4	MAP/microtubule affinity-regulating kinase 4	ENSG00000007047	ENSG00000007047
DHX9	DEAH (Asp-Glu-Ala-His) box helicase 9	ENSG00000135829	ENSG00000135829
OBSCN	obscurin, cytoskeletal calmodulin and titin-interacting RhoGEF	ENSG00000154358	ENSG00000154358
ACVRL1	activin A receptor type II-like 1	ENSG00000139567	ENSG00000139567
FGFR2	fibroblast growth factor receptor 2	ENSG00000066468	ENSG00000066468
MYLK	myosin light chain kinase	ENSG00000065534	ENSG00000065534
NOD1	nucleotide-binding oligomerization domain containing 1	ENSG00000106100	ENSG00000106100
RAD51	RAD51 recombinase	ENSG00000051180	ENSG00000051180
RPS6KA2	ribosomal protein S6 kinase, 90kDa, polypeptide 2	ENSG00000071242	ENSG00000071242
PIF1	PIF1 5'-to-3' DNA helicase	ENSG00000140451	ENSG00000140451
ATM	ataxia telangiectasia mutated	ENSG00000149311	ENSG00000149311
BMPR1A	bone morphogenetic protein receptor, type IA	ENSG00000107779	ENSG00000107779
GSS	glutathione synthetase	ENSG00000100983	ENSG00000100983
CDC42BPB	CDC42 binding protein kinase beta (DMPK-like)	ENSG00000198752	ENSG00000198752
PDGFRB	platelet-derived growth factor receptor, beta polypeptide	ENSG00000113721	ENSG00000113721
EHD2	EH-domain containing 2	ENSG00000024422	ENSG00000024422
PRKCZ	protein kinase C, zeta	ENSG00000067606	ENSG00000067606
TAP2	transporter 2, ATP-binding cassette, sub-family B (MDR/TAP)	ENSG00000206299	ENSG00000206299
NME2	NME/NM23 nucleoside diphosphate kinase 2	ENSG00000011052	ENSG00000011052
ENPP1	ectonucleotide pyrophosphatase/phosphodiesterase 1	ENSG00000197594	ENSG00000197594
PAK2	p21 protein (Cdc42/Rac)-activated kinase 2	ENSG00000180370	ENSG00000180370
EIF4A1	eukaryotic translation initiation factor 4A1	ENSG00000161960	ENSG00000161960
CSK	c-src tyrosine kinase	ENSG00000103653	ENSG00000103653
BLM	Bloom syndrome, RecQ helicase-like	ENSG00000197299	ENSG00000197299
RECQL4	RecQ protein-like 4	ENSG00000160957	ENSG00000160957
CHD5	chromodomain helicase DNA binding protein 5	ENSG00000116254	ENSG00000116254
ADCY5	adenylate cyclase 5	ENSG00000173175	ENSG00000173175
ATP7B	ATPase, Cu++ transporting, beta polypeptide	ENSG00000123191	ENSG00000123191
PYGL	phosphorylase, glycogen, liver	ENSG00000100504	ENSG00000100504
MAPK10	mitogen-activated protein kinase 10	ENSG00000109339	ENSG00000109339
PRKAG2	protein kinase, AMP-activated, gamma 2 non-catalytic subunit	ENSG00000106617	ENSG00000106617
ADCY3	adenylate cyclase 3	ENSG00000138031	ENSG00000138031
AKT1	v-akt murine thymoma viral oncogene homolog 1	ENSG00000142208	ENSG00000142208
EIF4A2	eukaryotic translation initiation factor 4A2	ENSG00000156976	ENSG00000156976
EPHB2	EPH receptor B2	ENSG00000133216	ENSG00000133216
MKKS	McKusick-Kaufman syndrome	ENSG00000125863	ENSG00000125863
EPHA7	EPH receptor A7	ENSG00000135333	ENSG00000135333
PDGFRA	platelet-derived growth factor receptor, alpha polypeptide	ENSG00000134853	ENSG00000134853
CDK5	cyclin-dependent kinase 5	ENSG00000164885	ENSG00000164885
PTK2	protein tyrosine kinase 2	ENSG00000169398	ENSG00000169398
DDX5	DEAD (Asp-Glu-Ala-Asp) box helicase 5	ENSG00000263077	ENSG00000263077
LONP1	lon peptidase 1, mitochondrial	ENSG00000196365	ENSG00000196365
RTEL1	regulator of telomere elongation helicase 1	ENSG00000258366	ENSG00000258366
GO:0005634	nucleus	C	2.441691e-11	164/5809	55
NRG1	neuregulin 1	ENSG00000157168	ENSG00000157168
NME1-NME2	NME1-NME2 readthrough	ENSG00000243678	ENSG00000243678
GTF2A1L	general transcription factor IIA, 1-like	ENSG00000242441	ENSG00000242441
TP73	tumor protein p73	ENSG00000078900	ENSG00000078900
IKBKB	inhibitor of kappa light polypeptide gene enhancer in B-cells, kinase beta	ENSG00000104365	ENSG00000104365
AIRE	autoimmune regulator	ENSG00000160224	ENSG00000160224
RARG	retinoic acid receptor, gamma	ENSG00000172819	ENSG00000172819
PBX1	pre-B-cell leukemia homeobox 1	ENSG00000185630	ENSG00000185630
HDAC9	histone deacetylase 9	ENSG00000048052	ENSG00000048052
BCOR	BCL6 corepressor	ENSG00000183337	ENSG00000183337
NKX2-5	NK2 homeobox 5	ENSG00000183072	ENSG00000183072
ZFHX3	zinc finger homeobox 3	ENSG00000140836	ENSG00000140836
ASH1L	ash1 (absent, small, or homeotic)-like (Drosophila)	ENSG00000116539	ENSG00000116539
BRAF	v-raf murine sarcoma viral oncogene homolog B	ENSG00000157764	ENSG00000157764
FOXL1	forkhead box L1	ENSG00000176678	ENSG00000176678
MLXIPL	MLX interacting protein-like	ENSG00000009950	ENSG00000009950
TOP3A	topoisomerase (DNA) III alpha	ENSG00000177302	ENSG00000177302
PRKCB	protein kinase C, beta	ENSG00000166501	ENSG00000166501
CDKN1B	cyclin-dependent kinase inhibitor 1B (p27, Kip1)	ENSG00000111276	ENSG00000111276
RPS6	ribosomal protein S6	ENSG00000137154	ENSG00000137154
CITED2	Cbp/p300-interacting transactivator, with Glu/Asp-rich carboxy-terminal domain, 2	ENSG00000164442	ENSG00000164442
SNCA	synuclein, alpha (non A4 component of amyloid precursor)	ENSG00000145335	ENSG00000145335
ACTN4	actinin, alpha 4	ENSG00000130402	ENSG00000130402
MEF2C	myocyte enhancer factor 2C	ENSG00000081189	ENSG00000081189
TSR1	TSR1, 20S rRNA accumulation, homolog (S. cerevisiae)	ENSG00000167721	ENSG00000167721
ACSL6	acyl-CoA synthetase long-chain family member 6	ENSG00000164398	ENSG00000164398
CHD1	chromodomain helicase DNA binding protein 1	ENSG00000153922	ENSG00000153922
NR2F2	nuclear receptor subfamily 2, group F, member 2	ENSG00000185551	ENSG00000185551
SKIL	SKI-like oncogene	ENSG00000136603	ENSG00000136603
STK4	serine/threonine kinase 4	ENSG00000101109	ENSG00000101109
CDK6	cyclin-dependent kinase 6	ENSG00000105810	ENSG00000105810
DYRK1A	dual-specificity tyrosine-(Y)-phosphorylation regulated kinase 1A	ENSG00000157540	ENSG00000157540
HTT	huntingtin	ENSG00000197386	ENSG00000197386
FOXD2	forkhead box D2	ENSG00000186564	ENSG00000186564
ASCL1	achaete-scute family bHLH transcription factor 1	ENSG00000139352	ENSG00000139352
IGHMBP2	immunoglobulin mu binding protein 2	ENSG00000132740	ENSG00000132740
NOTCH2	notch 2	ENSG00000134250	ENSG00000134250
PKN1	protein kinase N1	ENSG00000123143	ENSG00000123143
SMAD6	SMAD family member 6	ENSG00000137834	ENSG00000137834
FOXM1	forkhead box M1	ENSG00000111206	ENSG00000111206
DCK	deoxycytidine kinase	ENSG00000156136	ENSG00000156136
CDK20	cyclin-dependent kinase 20	ENSG00000156345	ENSG00000156345
FYN	FYN oncogene related to SRC, FGR, YES	ENSG00000010810	ENSG00000010810
PSMB9	proteasome (prosome, macropain) subunit, beta type, 9	ENSG00000243594	ENSG00000243594
NFKBIA	nuclear factor of kappa light polypeptide gene enhancer in B-cells inhibitor, alpha	ENSG00000100906	ENSG00000100906
MYH7	myosin, heavy chain 7, cardiac muscle, beta	ENSG00000092054	ENSG00000092054
FOXA2	forkhead box A2	ENSG00000125798	ENSG00000125798
HES1	hes family bHLH transcription factor 1	ENSG00000114315	ENSG00000114315
DLX5	distal-less homeobox 5	ENSG00000105880	ENSG00000105880
KDR	kinase insert domain receptor (a type III receptor tyrosine kinase)	ENSG00000128052	ENSG00000128052
RARA	retinoic acid receptor, alpha	ENSG00000131759	ENSG00000131759
DYNLL1	dynein, light chain, LC8-type 1	ENSG00000088986	ENSG00000088986
SFRP4	secreted frizzled-related protein 4	ENSG00000106483	ENSG00000106483
AXIN1	axin 1	ENSG00000103126	ENSG00000103126
RXRG	retinoid X receptor, gamma	ENSG00000143171	ENSG00000143171
FGFR1	fibroblast growth factor receptor 1	ENSG00000077782	ENSG00000077782
HMOX1	heme oxygenase (decycling) 1	ENSG00000100292	ENSG00000100292
LRP1	low density lipoprotein receptor-related protein 1	ENSG00000123384	ENSG00000123384
SMAD1	SMAD family member 1	ENSG00000170365	ENSG00000170365
MAPK15	mitogen-activated protein kinase 15	ENSG00000181085	ENSG00000181085
KDM2B	lysine (K)-specific demethylase 2B	ENSG00000089094	ENSG00000089094
TP63	tumor protein p63	ENSG00000073282	ENSG00000073282
WT1	Wilms tumor 1	ENSG00000184937	ENSG00000184937
FOXQ1	forkhead box Q1	ENSG00000164379	ENSG00000164379
BCL6	B-cell CLL/lymphoma 6	ENSG00000113916	ENSG00000113916
HDAC5	histone deacetylase 5	ENSG00000108840	ENSG00000108840
NKX2-1	NK2 homeobox 1	ENSG00000136352	ENSG00000136352
HAND1	heart and neural crest derivatives expressed 1	ENSG00000113196	ENSG00000113196
GLI3	GLI family zinc finger 3	ENSG00000106571	ENSG00000106571
DYRK1B	dual-specificity tyrosine-(Y)-phosphorylation regulated kinase 1B	ENSG00000105204	ENSG00000105204
TCF7L2	transcription factor 7-like 2 (T-cell specific, HMG-box)	ENSG00000148737	ENSG00000148737
FGFR4	fibroblast growth factor receptor 4	ENSG00000160867	ENSG00000160867
NKX2-6	NK2 homeobox 6	ENSG00000180053	ENSG00000180053
MSX1	msh homeobox 1	ENSG00000163132	ENSG00000163132
SMAD3	SMAD family member 3	ENSG00000166949	ENSG00000166949
ADRB3	adrenoceptor beta 3	ENSG00000188778	ENSG00000188778
SOX6	SRY (sex determining region Y)-box 6	ENSG00000110693	ENSG00000110693
PDX1	pancreatic and duodenal homeobox 1	ENSG00000139515	ENSG00000139515
TBX5	T-box 5	ENSG00000089225	ENSG00000089225
MYF5	myogenic factor 5	ENSG00000111049	ENSG00000111049
ATF4	activating transcription factor 4	ENSG00000128272	ENSG00000128272
RNF4	ring finger protein 4	ENSG00000063978	ENSG00000063978
SOX9	SRY (sex determining region Y)-box 9	ENSG00000125398	ENSG00000125398
NR2F1	nuclear receptor subfamily 2, group F, member 1	ENSG00000175745	ENSG00000175745
DNMT3A	DNA (cytosine-5-)-methyltransferase 3 alpha	ENSG00000119772	ENSG00000119772
FOXP1	forkhead box P1	ENSG00000114861	ENSG00000114861
TH	tyrosine hydroxylase	ENSG00000180176	ENSG00000180176
APEX1	APEX nuclease (multifunctional DNA repair enzyme) 1	ENSG00000100823	ENSG00000100823
DNA2	DNA replication helicase/nuclease 2	ENSG00000138346	ENSG00000138346
ID3	inhibitor of DNA binding 3, dominant negative helix-loop-helix protein	ENSG00000117318	ENSG00000117318
FADS1	fatty acid desaturase 1	ENSG00000149485	ENSG00000149485
DHX9	DEAH (Asp-Glu-Ala-His) box helicase 9	ENSG00000135829	ENSG00000135829
IRF4	interferon regulatory factor 4	ENSG00000137265	ENSG00000137265
FOXI2	forkhead box I2	ENSG00000186766	ENSG00000186766
GLI2	GLI family zinc finger 2	ENSG00000074047	ENSG00000074047
CACNA1A	calcium channel, voltage-dependent, P/Q type, alpha 1A subunit	ENSG00000141837	ENSG00000141837
RAN	RAN, member RAS oncogene family	ENSG00000132341	ENSG00000132341
CBS	cystathionine-beta-synthase	ENSG00000160200	ENSG00000160200
ADRA1A	adrenoceptor alpha 1A	ENSG00000120907	ENSG00000120907
FGFR2	fibroblast growth factor receptor 2	ENSG00000066468	ENSG00000066468
FOXK1	forkhead box K1	ENSG00000164916	ENSG00000164916
IKZF1	IKAROS family zinc finger 1 (Ikaros)	ENSG00000185811	ENSG00000185811
EGLN1	egl-9 family hypoxia-inducible factor 1	ENSG00000135766	ENSG00000135766
RAD51	RAD51 recombinase	ENSG00000051180	ENSG00000051180
GRB2	growth factor receptor-bound protein 2	ENSG00000177885	ENSG00000177885
RAG2	recombination activating gene 2	ENSG00000175097	ENSG00000175097
RPS6KA2	ribosomal protein S6 kinase, 90kDa, polypeptide 2	ENSG00000071242	ENSG00000071242
AQP1	aquaporin 1 (Colton blood group)	ENSG00000240583	ENSG00000240583
HERC2	HECT and RLD domain containing E3 ubiquitin protein ligase 2	ENSG00000128731	ENSG00000128731
ANG	angiogenin, ribonuclease, RNase A family, 5	ENSG00000214274	ENSG00000214274
ATM	ataxia telangiectasia mutated	ENSG00000149311	ENSG00000149311
TSHZ3	teashirt zinc finger homeobox 3	ENSG00000121297	ENSG00000121297
HNF1B	HNF1 homeobox B	ENSG00000108753	ENSG00000108753
AR	androgen receptor	ENSG00000169083	ENSG00000169083
GATA4	GATA binding protein 4	ENSG00000136574	ENSG00000136574
CEBPA	CCAAT/enhancer binding protein (C/EBP), alpha	ENSG00000245848	ENSG00000245848
PDGFRB	platelet-derived growth factor receptor, beta polypeptide	ENSG00000113721	ENSG00000113721
EHD2	EH-domain containing 2	ENSG00000024422	ENSG00000024422
PRKCZ	protein kinase C, zeta	ENSG00000067606	ENSG00000067606
FOXE3	forkhead box E3	ENSG00000186790	ENSG00000186790
TAP2	transporter 2, ATP-binding cassette, sub-family B (MDR/TAP)	ENSG00000206299	ENSG00000206299
NME2	NME/NM23 nucleoside diphosphate kinase 2	ENSG00000011052	ENSG00000011052
MYOD1	myogenic differentiation 1	ENSG00000129152	ENSG00000129152
MAP1S	microtubule-associated protein 1S	ENSG00000130479	ENSG00000130479
MAPT	microtubule-associated protein tau	ENSG00000186868	ENSG00000186868
PAK2	p21 protein (Cdc42/Rac)-activated kinase 2	ENSG00000180370	ENSG00000180370
NOTCH1	notch 1	ENSG00000148400	ENSG00000148400
TBL1XR1	transducin (beta)-like 1 X-linked receptor 1	ENSG00000177565	ENSG00000177565
NR5A2	nuclear receptor subfamily 5, group A, member 2	ENSG00000116833	ENSG00000116833
SHH	sonic hedgehog	ENSG00000164690	ENSG00000164690
OSGEP	O-sialoglycoprotein endopeptidase	ENSG00000092094	ENSG00000092094
POLR2H	polymerase (RNA) II (DNA directed) polypeptide H	ENSG00000163882	ENSG00000163882
SALL1	spalt-like transcription factor 1	ENSG00000103449	ENSG00000103449
BLM	Bloom syndrome, RecQ helicase-like	ENSG00000197299	ENSG00000197299
KCNIP3	Kv channel interacting protein 3, calsenilin	ENSG00000115041	ENSG00000115041
TBX3	T-box 3	ENSG00000135111	ENSG00000135111
CREBBP	CREB binding protein	ENSG00000005339	ENSG00000005339
HNF1A	HNF1 homeobox A	ENSG00000135100	ENSG00000135100
CHD5	chromodomain helicase DNA binding protein 5	ENSG00000116254	ENSG00000116254
FOXD4L1	forkhead box D4-like 1	ENSG00000184492	ENSG00000184492
SON	SON DNA binding protein	ENSG00000159140	ENSG00000159140
FOXO1	forkhead box O1	ENSG00000150907	ENSG00000150907
THRB	thyroid hormone receptor, beta	ENSG00000151090	ENSG00000151090
HR	hair growth associated	ENSG00000168453	ENSG00000168453
MESP1	mesoderm posterior 1 homolog (mouse)	ENSG00000166823	ENSG00000166823
NRIP1	nuclear receptor interacting protein 1	ENSG00000180530	ENSG00000180530
AKT1	v-akt murine thymoma viral oncogene homolog 1	ENSG00000142208	ENSG00000142208
XRCC4	X-ray repair complementing defective repair in Chinese hamster cells 4	ENSG00000152422	ENSG00000152422
FOXP2	forkhead box P2	ENSG00000128573	ENSG00000128573
HDAC4	histone deacetylase 4	ENSG00000068024	ENSG00000068024
NKX6-2	NK6 homeobox 2	ENSG00000148826	ENSG00000148826
BNIP3	BCL2/adenovirus E1B 19kDa interacting protein 3	ENSG00000176171	ENSG00000176171
FGF1	fibroblast growth factor 1 (acidic)	ENSG00000113578	ENSG00000113578
USF2	upstream transcription factor 2, c-fos interacting	ENSG00000105698	ENSG00000105698
RPA1	replication protein A1, 70kDa	ENSG00000132383	ENSG00000132383
KDM4A	lysine (K)-specific demethylase 4A	ENSG00000066135	ENSG00000066135
FOXA1	forkhead box A1	ENSG00000129514	ENSG00000129514
PSMA3	proteasome (prosome, macropain) subunit, alpha type, 3	ENSG00000100567	ENSG00000100567
PDGFRA	platelet-derived growth factor receptor, alpha polypeptide	ENSG00000134853	ENSG00000134853
CDK5	cyclin-dependent kinase 5	ENSG00000164885	ENSG00000164885
PTK2	protein tyrosine kinase 2	ENSG00000169398	ENSG00000169398
DDX5	DEAD (Asp-Glu-Ala-Asp) box helicase 5	ENSG00000263077	ENSG00000263077
RTEL1	regulator of telomere elongation helicase 1	ENSG00000258366	ENSG00000258366
PRDM16	PR domain containing 16	ENSG00000142611	ENSG00000142611
GO:0005654	nucleoplasm	C	2.451628e-11	58/1119	56
RARG	retinoic acid receptor, gamma	ENSG00000172819	ENSG00000172819
HDAC9	histone deacetylase 9	ENSG00000048052	ENSG00000048052
UBE2D3	ubiquitin-conjugating enzyme E2D 3	ENSG00000109332	ENSG00000109332
MLXIPL	MLX interacting protein-like	ENSG00000009950	ENSG00000009950
CDKN1B	cyclin-dependent kinase inhibitor 1B (p27, Kip1)	ENSG00000111276	ENSG00000111276
MEF2C	myocyte enhancer factor 2C	ENSG00000081189	ENSG00000081189
SKIL	SKI-like oncogene	ENSG00000136603	ENSG00000136603
DYRK1A	dual-specificity tyrosine-(Y)-phosphorylation regulated kinase 1A	ENSG00000157540	ENSG00000157540
NOTCH2	notch 2	ENSG00000134250	ENSG00000134250
PSMB9	proteasome (prosome, macropain) subunit, beta type, 9	ENSG00000243594	ENSG00000243594
HES1	hes family bHLH transcription factor 1	ENSG00000114315	ENSG00000114315
RARA	retinoic acid receptor, alpha	ENSG00000131759	ENSG00000131759
PSMD14	proteasome (prosome, macropain) 26S subunit, non-ATPase, 14	ENSG00000115233	ENSG00000115233
PSME3	proteasome (prosome, macropain) activator subunit 3 (PA28 gamma; Ki)	ENSG00000131467	ENSG00000131467
RXRG	retinoid X receptor, gamma	ENSG00000143171	ENSG00000143171
SMAD1	SMAD family member 1	ENSG00000170365	ENSG00000170365
TP63	tumor protein p63	ENSG00000073282	ENSG00000073282
WT1	Wilms tumor 1	ENSG00000184937	ENSG00000184937
HDAC5	histone deacetylase 5	ENSG00000108840	ENSG00000108840
NKX2-1	NK2 homeobox 1	ENSG00000136352	ENSG00000136352
HAND1	heart and neural crest derivatives expressed 1	ENSG00000113196	ENSG00000113196
UBB	ubiquitin B	ENSG00000170315	ENSG00000170315
TCF7L2	transcription factor 7-like 2 (T-cell specific, HMG-box)	ENSG00000148737	ENSG00000148737
SMAD3	SMAD family member 3	ENSG00000166949	ENSG00000166949
CIITA	class II, major histocompatibility complex, transactivator	ENSG00000179583	ENSG00000179583
PRKACB	protein kinase, cAMP-dependent, catalytic, beta	ENSG00000142875	ENSG00000142875
TBX5	T-box 5	ENSG00000089225	ENSG00000089225
MYF5	myogenic factor 5	ENSG00000111049	ENSG00000111049
ATF4	activating transcription factor 4	ENSG00000128272	ENSG00000128272
PSME2	proteasome (prosome, macropain) activator subunit 2 (PA28 beta)	ENSG00000100911	ENSG00000100911
NR2F1	nuclear receptor subfamily 2, group F, member 1	ENSG00000175745	ENSG00000175745
APEX1	APEX nuclease (multifunctional DNA repair enzyme) 1	ENSG00000100823	ENSG00000100823
DUSP6	dual specificity phosphatase 6	ENSG00000139318	ENSG00000139318
ALKBH2	alkB, alkylation repair homolog 2 (E. coli)	ENSG00000189046	ENSG00000189046
DNA2	DNA replication helicase/nuclease 2	ENSG00000138346	ENSG00000138346
DHX9	DEAH (Asp-Glu-Ala-His) box helicase 9	ENSG00000135829	ENSG00000135829
RAN	RAN, member RAS oncogene family	ENSG00000132341	ENSG00000132341
RAD51	RAD51 recombinase	ENSG00000051180	ENSG00000051180
RPS6KA2	ribosomal protein S6 kinase, 90kDa, polypeptide 2	ENSG00000071242	ENSG00000071242
ATM	ataxia telangiectasia mutated	ENSG00000149311	ENSG00000149311
AR	androgen receptor	ENSG00000169083	ENSG00000169083
GATA4	GATA binding protein 4	ENSG00000136574	ENSG00000136574
MYOD1	myogenic differentiation 1	ENSG00000129152	ENSG00000129152
NOTCH1	notch 1	ENSG00000148400	ENSG00000148400
TBL1XR1	transducin (beta)-like 1 X-linked receptor 1	ENSG00000177565	ENSG00000177565
NR5A2	nuclear receptor subfamily 5, group A, member 2	ENSG00000116833	ENSG00000116833
POLR2H	polymerase (RNA) II (DNA directed) polypeptide H	ENSG00000163882	ENSG00000163882
CREBBP	CREB binding protein	ENSG00000005339	ENSG00000005339
PSMB8	proteasome (prosome, macropain) subunit, beta type, 8	ENSG00000206298	ENSG00000206298
MAPK10	mitogen-activated protein kinase 10	ENSG00000109339	ENSG00000109339
FOXO1	forkhead box O1	ENSG00000150907	ENSG00000150907
PRKAG2	protein kinase, AMP-activated, gamma 2 non-catalytic subunit	ENSG00000106617	ENSG00000106617
THRB	thyroid hormone receptor, beta	ENSG00000151090	ENSG00000151090
AKT1	v-akt murine thymoma viral oncogene homolog 1	ENSG00000142208	ENSG00000142208
XRCC4	X-ray repair complementing defective repair in Chinese hamster cells 4	ENSG00000152422	ENSG00000152422
BNIP3	BCL2/adenovirus E1B 19kDa interacting protein 3	ENSG00000176171	ENSG00000176171
RPA1	replication protein A1, 70kDa	ENSG00000132383	ENSG00000132383
PSMA3	proteasome (prosome, macropain) subunit, alpha type, 3	ENSG00000100567	ENSG00000100567
GO:0005829	cytosol	C	2.457690e-11	110/2766	57
NME1-NME2	NME1-NME2 readthrough	ENSG00000243678	ENSG00000243678
TP73	tumor protein p73	ENSG00000078900	ENSG00000078900
PFKFB1	6-phosphofructo-2-kinase/fructose-2,6-biphosphatase 1	ENSG00000158571	ENSG00000158571
IKBKB	inhibitor of kappa light polypeptide gene enhancer in B-cells, kinase beta	ENSG00000104365	ENSG00000104365
SPHK2	sphingosine kinase 2	ENSG00000063176	ENSG00000063176
ME1	malic enzyme 1, NADP(+)-dependent, cytosolic	ENSG00000065833	ENSG00000065833
UBE2D3	ubiquitin-conjugating enzyme E2D 3	ENSG00000109332	ENSG00000109332
BRAF	v-raf murine sarcoma viral oncogene homolog B	ENSG00000157764	ENSG00000157764
MLXIPL	MLX interacting protein-like	ENSG00000009950	ENSG00000009950
PRKCB	protein kinase C, beta	ENSG00000166501	ENSG00000166501
GART	phosphoribosylglycinamide formyltransferase, phosphoribosylglycinamide synthetase, phosphoribosylaminoimidazole synthetase	ENSG00000159131	ENSG00000159131
CDKN1B	cyclin-dependent kinase inhibitor 1B (p27, Kip1)	ENSG00000111276	ENSG00000111276
RPS6	ribosomal protein S6	ENSG00000137154	ENSG00000137154
BCAR1	breast cancer anti-estrogen resistance 1	ENSG00000050820	ENSG00000050820
MAP3K3	mitogen-activated protein kinase kinase kinase 3	ENSG00000198909	ENSG00000198909
KALRN	kalirin, RhoGEF kinase	ENSG00000160145	ENSG00000160145
SNCA	synuclein, alpha (non A4 component of amyloid precursor)	ENSG00000145335	ENSG00000145335
PDE11A	phosphodiesterase 11A	ENSG00000128655	ENSG00000128655
IRAK2	interleukin-1 receptor-associated kinase 2	ENSG00000134070	ENSG00000134070
VAV2	vav 2 guanine nucleotide exchange factor	ENSG00000160293	ENSG00000160293
STK4	serine/threonine kinase 4	ENSG00000101109	ENSG00000101109
NOD2	nucleotide-binding oligomerization domain containing 2	ENSG00000167207	ENSG00000167207
LDLRAP1	low density lipoprotein receptor adaptor protein 1	ENSG00000157978	ENSG00000157978
CDK6	cyclin-dependent kinase 6	ENSG00000105810	ENSG00000105810
HTT	huntingtin	ENSG00000197386	ENSG00000197386
RASGRF1	Ras protein-specific guanine nucleotide-releasing factor 1	ENSG00000058335	ENSG00000058335
FBP1	fructose-1,6-bisphosphatase 1	ENSG00000165140	ENSG00000165140
SMAD6	SMAD family member 6	ENSG00000137834	ENSG00000137834
PYGM	phosphorylase, glycogen, muscle	ENSG00000068976	ENSG00000068976
DCK	deoxycytidine kinase	ENSG00000156136	ENSG00000156136
FYN	FYN oncogene related to SRC, FGR, YES	ENSG00000010810	ENSG00000010810
PSMB9	proteasome (prosome, macropain) subunit, beta type, 9	ENSG00000243594	ENSG00000243594
NFKBIA	nuclear factor of kappa light polypeptide gene enhancer in B-cells inhibitor, alpha	ENSG00000100906	ENSG00000100906
SPRY2	sprouty homolog 2 (Drosophila)	ENSG00000136158	ENSG00000136158
ARHGEF2	Rho/Rac guanine nucleotide exchange factor (GEF) 2	ENSG00000116584	ENSG00000116584
DYNLL1	dynein, light chain, LC8-type 1	ENSG00000088986	ENSG00000088986
PSMD14	proteasome (prosome, macropain) 26S subunit, non-ATPase, 14	ENSG00000115233	ENSG00000115233
PSME3	proteasome (prosome, macropain) activator subunit 3 (PA28 gamma; Ki)	ENSG00000131467	ENSG00000131467
ALDH9A1	aldehyde dehydrogenase 9 family, member A1	ENSG00000143149	ENSG00000143149
AXIN1	axin 1	ENSG00000103126	ENSG00000103126
SFRP1	secreted frizzled-related protein 1	ENSG00000104332	ENSG00000104332
FGFR1	fibroblast growth factor receptor 1	ENSG00000077782	ENSG00000077782
GOT1	glutamic-oxaloacetic transaminase 1, soluble	ENSG00000120053	ENSG00000120053
HMOX1	heme oxygenase (decycling) 1	ENSG00000100292	ENSG00000100292
SMAD1	SMAD family member 1	ENSG00000170365	ENSG00000170365
TP63	tumor protein p63	ENSG00000073282	ENSG00000073282
FASN	fatty acid synthase	ENSG00000169710	ENSG00000169710
VAV3	vav 3 guanine nucleotide exchange factor	ENSG00000134215	ENSG00000134215
HDAC5	histone deacetylase 5	ENSG00000108840	ENSG00000108840
GLI3	GLI family zinc finger 3	ENSG00000106571	ENSG00000106571
UBB	ubiquitin B	ENSG00000170315	ENSG00000170315
PLCG2	phospholipase C, gamma 2 (phosphatidylinositol-specific)	ENSG00000197943	ENSG00000197943
SMAD3	SMAD family member 3	ENSG00000166949	ENSG00000166949
NOS1	nitric oxide synthase 1 (neuronal)	ENSG00000089250	ENSG00000089250
CARS	cysteinyl-tRNA synthetase	ENSG00000110619	ENSG00000110619
CACNB4	calcium channel, voltage-dependent, beta 4 subunit	ENSG00000182389	ENSG00000182389
PRKACB	protein kinase, cAMP-dependent, catalytic, beta	ENSG00000142875	ENSG00000142875
PDX1	pancreatic and duodenal homeobox 1	ENSG00000139515	ENSG00000139515
ALOX12	arachidonate 12-lipoxygenase	ENSG00000108839	ENSG00000108839
ERAP1	endoplasmic reticulum aminopeptidase 1	ENSG00000164307	ENSG00000164307
ATXN10	ataxin 10	ENSG00000130638	ENSG00000130638
PSME2	proteasome (prosome, macropain) activator subunit 2 (PA28 beta)	ENSG00000100911	ENSG00000100911
NRP1	neuropilin 1	ENSG00000099250	ENSG00000099250
EIF4A3	eukaryotic translation initiation factor 4A3	ENSG00000141543	ENSG00000141543
TH	tyrosine hydroxylase	ENSG00000180176	ENSG00000180176
DUSP6	dual specificity phosphatase 6	ENSG00000139318	ENSG00000139318
ASNS	asparagine synthetase (glutamine-hydrolyzing)	ENSG00000070669	ENSG00000070669
DHX9	DEAH (Asp-Glu-Ala-His) box helicase 9	ENSG00000135829	ENSG00000135829
IRF4	interferon regulatory factor 4	ENSG00000137265	ENSG00000137265
RAN	RAN, member RAS oncogene family	ENSG00000132341	ENSG00000132341
OBSCN	obscurin, cytoskeletal calmodulin and titin-interacting RhoGEF	ENSG00000154358	ENSG00000154358
CBS	cystathionine-beta-synthase	ENSG00000160200	ENSG00000160200
MYLK	myosin light chain kinase	ENSG00000065534	ENSG00000065534
NOD1	nucleotide-binding oligomerization domain containing 1	ENSG00000106100	ENSG00000106100
EGLN1	egl-9 family hypoxia-inducible factor 1	ENSG00000135766	ENSG00000135766
GRB2	growth factor receptor-bound protein 2	ENSG00000177885	ENSG00000177885
RPS6KA2	ribosomal protein S6 kinase, 90kDa, polypeptide 2	ENSG00000071242	ENSG00000071242
SYNJ2	synaptojanin 2	ENSG00000078269	ENSG00000078269
PRKAR2B	protein kinase, cAMP-dependent, regulatory, type II, beta	ENSG00000005249	ENSG00000005249
PRKAR1B	protein kinase, cAMP-dependent, regulatory, type I, beta	ENSG00000188191	ENSG00000188191
DPYSL2	dihydropyrimidinase-like 2	ENSG00000092964	ENSG00000092964
STUB1	STIP1 homology and U-box containing protein 1, E3 ubiquitin protein ligase	ENSG00000103266	ENSG00000103266
GSS	glutathione synthetase	ENSG00000100983	ENSG00000100983
[truncated: 985 more rows]

## Sheet: Table S10b
Enriched GO terms (Biological Process) and Genes resulting from Evolutionary Selection of CpG sites
Term/Gene Name	Annotation/Gene Description	Category/GeneID	P-value/Gene	Enrichment	Rank
GO:0033603	positive regulation of dopamine secretion	P	3.439481e-07	3/6	1
NPY2R	neuropeptide Y receptor Y2	ENSG00000185149	ENSG00000185149
CXCL12	chemokine (C-X-C motif) ligand 12	ENSG00000107562	ENSG00000107562
GDNF	glial cell derived neurotrophic factor	ENSG00000168621	ENSG00000168621
GO:0016458	gene silencing	P	7.947100e-07	3/7	2
CHMP1A	charged multivesicular body protein 1A	ENSG00000131165	ENSG00000131165
SOX6	SRY (sex determining region Y)-box 6	ENSG00000110693	ENSG00000110693
KCNQ1	potassium voltage-gated channel, KQT-like subfamily, member 1	ENSG00000053918	ENSG00000053918
GO:0003700	sequence-specific DNA binding transcription factor activity	F	4.475467e-06	31/1071	3
ZFHX3	zinc finger homeobox 3	ENSG00000140836	ENSG00000140836
MECOM	MDS1 and EVI1 complex locus	ENSG00000085276	ENSG00000085276
MLXIPL	MLX interacting protein-like	ENSG00000009950	ENSG00000009950
CUX1	cut-like homeobox 1	ENSG00000257923	ENSG00000257923
TFEC	transcription factor EC	ENSG00000105967	ENSG00000105967
GATA3	GATA binding protein 3	ENSG00000107485	ENSG00000107485
KRT79	keratin 79	ENSG00000185640	ENSG00000185640
TP63	tumor protein p63	ENSG00000073282	ENSG00000073282
GLI3	GLI family zinc finger 3	ENSG00000106571	ENSG00000106571
NFIX	nuclear factor I/X (CCAAT-binding transcription factor)	ENSG00000008441	ENSG00000008441
GAS7	growth arrest-specific 7	ENSG00000007237	ENSG00000007237
SOX6	SRY (sex determining region Y)-box 6	ENSG00000110693	ENSG00000110693
PCGF6	polycomb group ring finger 6	ENSG00000156374	ENSG00000156374
FOXP1	forkhead box P1	ENSG00000114861	ENSG00000114861
PRRX1	paired related homeobox 1	ENSG00000116132	ENSG00000116132
NFYA	nuclear transcription factor Y, alpha	ENSG00000001167	ENSG00000001167
ZFP42	ZFP42 zinc finger protein	ENSG00000179059	ENSG00000179059
CBFA2T3	core-binding factor, runt domain, alpha subunit 2; translocated to, 3	ENSG00000129993	ENSG00000129993
AR	androgen receptor	ENSG00000169083	ENSG00000169083
TRIM29	tripartite motif containing 29	ENSG00000137699	ENSG00000137699
IRX5	iroquois homeobox 5	ENSG00000176842	ENSG00000176842
LMX1A	LIM homeobox transcription factor 1, alpha	ENSG00000162761	ENSG00000162761
MYOD1	myogenic differentiation 1	ENSG00000129152	ENSG00000129152
NOTCH1	notch 1	ENSG00000148400	ENSG00000148400
LBX1	ladybird homeobox 1	ENSG00000138136	ENSG00000138136
MKX	mohawk homeobox	ENSG00000150051	ENSG00000150051
CBFA2T2	core-binding factor, runt domain, alpha subunit 2; translocated to, 2	ENSG00000078699	ENSG00000078699
NFE2L3	nuclear factor, erythroid 2-like 3	ENSG00000050344	ENSG00000050344
RERE	arginine-glutamic acid dipeptide (RE) repeats	ENSG00000142599	ENSG00000142599
ZBTB17	zinc finger and BTB domain containing 17	ENSG00000116809	ENSG00000116809
RUNX3	runt-related transcription factor 3	ENSG00000020633	ENSG00000020633
GO:0007411	axon guidance	P	7.504647e-06	15/345	4
COL6A1	collagen, type VI, alpha 1	ENSG00000142156	ENSG00000142156
GATA3	GATA binding protein 3	ENSG00000107485	ENSG00000107485
COL6A2	collagen, type VI, alpha 2	ENSG00000142173	ENSG00000142173
GLI3	GLI family zinc finger 3	ENSG00000106571	ENSG00000106571
TRIO	trio Rho guanine nucleotide exchange factor	ENSG00000038382	ENSG00000038382
CACNB4	calcium channel, voltage-dependent, beta 4 subunit	ENSG00000182389	ENSG00000182389
SRGAP1	SLIT-ROBO Rho GTPase activating protein 1	ENSG00000196935	ENSG00000196935
EXT1	exostosin glycosyltransferase 1	ENSG00000182197	ENSG00000182197
DPYSL2	dihydropyrimidinase-like 2	ENSG00000092964	ENSG00000092964
LMX1A	LIM homeobox transcription factor 1, alpha	ENSG00000162761	ENSG00000162761
PAK2	p21 protein (Cdc42/Rac)-activated kinase 2	ENSG00000180370	ENSG00000180370
AP2A1	adaptor-related protein complex 2, alpha 1 subunit	ENSG00000196961	ENSG00000196961
RUNX3	runt-related transcription factor 3	ENSG00000020633	ENSG00000020633
GDNF	glial cell derived neurotrophic factor	ENSG00000168621	ENSG00000168621
CDK5	cyclin-dependent kinase 5	ENSG00000164885	ENSG00000164885
GO:0035249	synaptic transmission, glutamatergic	P	8.029301e-06	4/23	5
GRIN1	glutamate receptor, ionotropic, N-methyl D-aspartate 1	ENSG00000176884	ENSG00000176884
CACNB4	calcium channel, voltage-dependent, beta 4 subunit	ENSG00000182389	ENSG00000182389
CDK5	cyclin-dependent kinase 5	ENSG00000164885	ENSG00000164885
PLAT	plasminogen activator, tissue	ENSG00000104368	ENSG00000104368
GO:0045662	negative regulation of myoblast differentiation	P	1.069943e-05	3/12	6
ZFHX3	zinc finger homeobox 3	ENSG00000140836	ENSG00000140836
NOTCH1	notch 1	ENSG00000148400	ENSG00000148400
MKX	mohawk homeobox	ENSG00000150051	ENSG00000150051
GO:0030900	forebrain development	P	1.293413e-05	7/87	7
MECOM	MDS1 and EVI1 complex locus	ENSG00000085276	ENSG00000085276
PRKG1	protein kinase, cGMP-dependent, type I	ENSG00000185532	ENSG00000185532
DIXDC1	DIX domain containing 1	ENSG00000150764	ENSG00000150764
GLI3	GLI family zinc finger 3	ENSG00000106571	ENSG00000106571
GNAO1	guanine nucleotide binding protein (G protein), alpha activating activity polypeptide O	ENSG00000087258	ENSG00000087258
NOTCH1	notch 1	ENSG00000148400	ENSG00000148400
CDK5	cyclin-dependent kinase 5	ENSG00000164885	ENSG00000164885
GO:0043523	regulation of neuron apoptosis	P	1.849483e-05	4/27	8
GATA3	GATA binding protein 3	ENSG00000107485	ENSG00000107485
TRIM2	tripartite motif containing 2	ENSG00000109654	ENSG00000109654
TP63	tumor protein p63	ENSG00000073282	ENSG00000073282
GRIN1	glutamate receptor, ionotropic, N-methyl D-aspartate 1	ENSG00000176884	ENSG00000176884
GO:0001501	skeletal system development	P	2.144622e-05	9/152	9
CMKLR1	chemokine-like receptor 1	ENSG00000174600	ENSG00000174600
COL11A2	collagen, type XI, alpha 2	ENSG00000235708	ENSG00000235708
CDH11	cadherin 11, type 2, OB-cadherin (osteoblast)	ENSG00000140937	ENSG00000140937
TP63	tumor protein p63	ENSG00000073282	ENSG00000073282
WDR5	WD repeat domain 5	ENSG00000196363	ENSG00000196363
EXT1	exostosin glycosyltransferase 1	ENSG00000182197	ENSG00000182197
GNA11	guanine nucleotide binding protein (G protein), alpha 11 (Gq class)	ENSG00000088256	ENSG00000088256
FAM20C	family with sequence similarity 20, member C	ENSG00000177706	ENSG00000177706
DLL3	delta-like 3 (Drosophila)	ENSG00000090932	ENSG00000090932
GO:0031069	hair follicle morphogenesis	P	2.228749e-05	4/28	10
TP63	tumor protein p63	ENSG00000073282	ENSG00000073282
FGFR2	fibroblast growth factor receptor 2	ENSG00000066468	ENSG00000066468
NOTCH1	notch 1	ENSG00000148400	ENSG00000148400
RUNX3	runt-related transcription factor 3	ENSG00000020633	ENSG00000020633
GO:0048663	neuron fate commitment	P	2.665813e-05	4/29	11
NRG1	neuregulin 1	ENSG00000157168	ENSG00000157168
GLI3	GLI family zinc finger 3	ENSG00000106571	ENSG00000106571
NOTCH1	notch 1	ENSG00000148400	ENSG00000148400
LBX1	ladybird homeobox 1	ENSG00000138136	ENSG00000138136
GO:0045786	negative regulation of cell cycle	P	3.126730e-05	5/49	12
GATA3	GATA binding protein 3	ENSG00000107485	ENSG00000107485
ZBTB17	zinc finger and BTB domain containing 17	ENSG00000116809	ENSG00000116809
RUNX3	runt-related transcription factor 3	ENSG00000020633	ENSG00000020633
CDK5	cyclin-dependent kinase 5	ENSG00000164885	ENSG00000164885
PTPRK	protein tyrosine phosphatase, receptor type, K	ENSG00000152894	ENSG00000152894
GO:0004972	N-methyl-D-aspartate selective glutamate receptor activity	F	3.697153e-05	2/6	13
GRIN1	glutamate receptor, ionotropic, N-methyl D-aspartate 1	ENSG00000176884	ENSG00000176884
GRIN2D	glutamate receptor, ionotropic, N-methyl D-aspartate 2D	ENSG00000105464	ENSG00000105464
GO:0051262	protein tetramerization	P	5.936748e-05	4/34	14
TXNRD1	thioredoxin reductase 1	ENSG00000198431	ENSG00000198431
DHRS4	dehydrogenase/reductase (SDR family) member 4	ENSG00000157326	ENSG00000157326
TP63	tumor protein p63	ENSG00000073282	ENSG00000073282
GRIN1	glutamate receptor, ionotropic, N-methyl D-aspartate 1	ENSG00000176884	ENSG00000176884
GO:0002053	positive regulation of mesenchymal cell proliferation	P	7.881611e-05	4/36	15
TP63	tumor protein p63	ENSG00000073282	ENSG00000073282
FOXP1	forkhead box P1	ENSG00000114861	ENSG00000114861
PRRX1	paired related homeobox 1	ENSG00000116132	ENSG00000116132
FGFR2	fibroblast growth factor receptor 2	ENSG00000066468	ENSG00000066468
GO:0030425	dendrite	C	1.127156e-04	11/261	16
PCSK2	proprotein convertase subtilisin/kexin type 2	ENSG00000125851	ENSG00000125851
COBL	cordon-bleu WH2 repeat protein	ENSG00000106078	ENSG00000106078
TP63	tumor protein p63	ENSG00000073282	ENSG00000073282
GRIN1	glutamate receptor, ionotropic, N-methyl D-aspartate 1	ENSG00000176884	ENSG00000176884
CNGA3	cyclic nucleotide gated channel alpha 3	ENSG00000144191	ENSG00000144191
KCNB1	potassium voltage-gated channel, Shab-related subfamily, member 1	ENSG00000158445	ENSG00000158445
IL1RAPL1	interleukin 1 receptor accessory protein-like 1	ENSG00000169306	ENSG00000169306
DPYSL2	dihydropyrimidinase-like 2	ENSG00000092964	ENSG00000092964
AR	androgen receptor	ENSG00000169083	ENSG00000169083
CDK5	cyclin-dependent kinase 5	ENSG00000164885	ENSG00000164885
PTPRK	protein tyrosine phosphatase, receptor type, K	ENSG00000152894	ENSG00000152894
GO:0048709	oligodendrocyte differentiation	P	1.184308e-04	3/21	17
GLI3	GLI family zinc finger 3	ENSG00000106571	ENSG00000106571
SOX6	SRY (sex determining region Y)-box 6	ENSG00000110693	ENSG00000110693
CDK5	cyclin-dependent kinase 5	ENSG00000164885	ENSG00000164885
GO:0030334	regulation of cell migration	P	1.434438e-04	5/64	18
LAMA4	laminin, alpha 4	ENSG00000112769	ENSG00000112769
CXCL12	chemokine (C-X-C motif) ligand 12	ENSG00000107562	ENSG00000107562
NOTCH1	notch 1	ENSG00000148400	ENSG00000148400
ROBO4	roundabout, axon guidance receptor, homolog 4 (Drosophila)	ENSG00000154133	ENSG00000154133
CDK5	cyclin-dependent kinase 5	ENSG00000164885	ENSG00000164885
GO:0008013	beta-catenin binding	F	1.564004e-04	5/65	19
AXIN1	axin 1	ENSG00000103126	ENSG00000103126
GLI3	GLI family zinc finger 3	ENSG00000106571	ENSG00000106571
AR	androgen receptor	ENSG00000169083	ENSG00000169083
PTPRU	protein tyrosine phosphatase, receptor type, U	ENSG00000060656	ENSG00000060656
PTPRK	protein tyrosine phosphatase, receptor type, K	ENSG00000152894	ENSG00000152894
GO:0030182	neuron differentiation	P	1.734143e-04	7/125	20
GATA3	GATA binding protein 3	ENSG00000107485	ENSG00000107485
GAS7	growth arrest-specific 7	ENSG00000007237	ENSG00000007237
PSD	pleckstrin and Sec7 domain containing	ENSG00000059915	ENSG00000059915
IL1RAPL1	interleukin 1 receptor accessory protein-like 1	ENSG00000169306	ENSG00000169306
LMX1A	LIM homeobox transcription factor 1, alpha	ENSG00000162761	ENSG00000162761
NOTCH1	notch 1	ENSG00000148400	ENSG00000148400
CDK5	cyclin-dependent kinase 5	ENSG00000164885	ENSG00000164885
GO:0000790	nuclear chromatin	C	1.854158e-04	6/95	21
GATA3	GATA binding protein 3	ENSG00000107485	ENSG00000107485
TP63	tumor protein p63	ENSG00000073282	ENSG00000073282
SMARCD3	SWI/SNF related, matrix associated, actin dependent regulator of chromatin, subfamily d, member 3	ENSG00000082014	ENSG00000082014
AR	androgen receptor	ENSG00000169083	ENSG00000169083
MYOD1	myogenic differentiation 1	ENSG00000129152	ENSG00000129152
RUNX3	runt-related transcription factor 3	ENSG00000020633	ENSG00000020633
GO:0048568	embryonic organ development	P	2.041810e-04	3/24	22
GATA3	GATA binding protein 3	ENSG00000107485	ENSG00000107485
MAB21L2	mab-21-like 2 (C. elegans)	ENSG00000181541	ENSG00000181541
FGFR2	fibroblast growth factor receptor 2	ENSG00000066468	ENSG00000066468
GO:0010468	regulation of gene expression	P	2.392384e-04	7/131	23
GLI3	GLI family zinc finger 3	ENSG00000106571	ENSG00000106571
SOX6	SRY (sex determining region Y)-box 6	ENSG00000110693	ENSG00000110693
AR	androgen receptor	ENSG00000169083	ENSG00000169083
IRX5	iroquois homeobox 5	ENSG00000176842	ENSG00000176842
LMX1A	LIM homeobox transcription factor 1, alpha	ENSG00000162761	ENSG00000162761
NOTCH1	notch 1	ENSG00000148400	ENSG00000148400
MKX	mohawk homeobox	ENSG00000150051	ENSG00000150051
GO:0045892	negative regulation of transcription, DNA-dependent	P	2.471035e-04	16/511	24
NRG1	neuregulin 1	ENSG00000157168	ENSG00000157168
ZFHX3	zinc finger homeobox 3	ENSG00000140836	ENSG00000140836
MECOM	MDS1 and EVI1 complex locus	ENSG00000085276	ENSG00000085276
MLXIPL	MLX interacting protein-like	ENSG00000009950	ENSG00000009950
LRRFIP1	leucine rich repeat (in FLII) interacting protein 1	ENSG00000124831	ENSG00000124831
CHMP1A	charged multivesicular body protein 1A	ENSG00000131165	ENSG00000131165
GATA3	GATA binding protein 3	ENSG00000107485	ENSG00000107485
TP63	tumor protein p63	ENSG00000073282	ENSG00000073282
GLI3	GLI family zinc finger 3	ENSG00000106571	ENSG00000106571
SOX6	SRY (sex determining region Y)-box 6	ENSG00000110693	ENSG00000110693
PCGF6	polycomb group ring finger 6	ENSG00000156374	ENSG00000156374
FOXP1	forkhead box P1	ENSG00000114861	ENSG00000114861
NOTCH1	notch 1	ENSG00000148400	ENSG00000148400
CBFA2T2	core-binding factor, runt domain, alpha subunit 2; translocated to, 2	ENSG00000078699	ENSG00000078699
CDK5	cyclin-dependent kinase 5	ENSG00000164885	ENSG00000164885
PTPRK	protein tyrosine phosphatase, receptor type, K	ENSG00000152894	ENSG00000152894
GO:0007155	cell adhesion	P	2.585532e-04	16/513	25
PVR	poliovirus receptor	ENSG00000073008	ENSG00000073008
COL6A1	collagen, type VI, alpha 1	ENSG00000142156	ENSG00000142156
MSLNL	mesothelin-like	ENSG00000162006	ENSG00000162006
CDH11	cadherin 11, type 2, OB-cadherin (osteoblast)	ENSG00000140937	ENSG00000140937
STAB2	stabilin 2	ENSG00000136011	ENSG00000136011
DDR1	discoidin domain receptor tyrosine kinase 1	ENSG00000230456	ENSG00000230456
DPT	dermatopontin	ENSG00000143196	ENSG00000143196
PCDHB3	protocadherin beta 3	ENSG00000113205	ENSG00000113205
LAMA4	laminin, alpha 4	ENSG00000112769	ENSG00000112769
F5	coagulation factor V (proaccelerin, labile factor)	ENSG00000198734	ENSG00000198734
CXCL12	chemokine (C-X-C motif) ligand 12	ENSG00000107562	ENSG00000107562
GPNMB	glycoprotein (transmembrane) nmb	ENSG00000136235	ENSG00000136235
MAGI1	membrane associated guanylate kinase, WW and PDZ domain containing 1	ENSG00000151276	ENSG00000151276
MTSS1	metastasis suppressor 1	ENSG00000170873	ENSG00000170873
PTPRU	protein tyrosine phosphatase, receptor type, U	ENSG00000060656	ENSG00000060656
PTPRK	protein tyrosine phosphatase, receptor type, K	ENSG00000152894	ENSG00000152894
GO:0007517	muscle organ development	P	2.709283e-04	6/101	26
NRG1	neuregulin 1	ENSG00000157168	ENSG00000157168
ZFHX3	zinc finger homeobox 3	ENSG00000140836	ENSG00000140836
SOX6	SRY (sex determining region Y)-box 6	ENSG00000110693	ENSG00000110693
MYOD1	myogenic differentiation 1	ENSG00000129152	ENSG00000129152
LBX1	ladybird homeobox 1	ENSG00000138136	ENSG00000138136
MKX	mohawk homeobox	ENSG00000150051	ENSG00000150051
GO:0045202	synapse	C	3.398268e-04	9/212	27
NRG1	neuregulin 1	ENSG00000157168	ENSG00000157168
EGFLAM	EGF-like, fibronectin type III and laminin G domains	ENSG00000164318	ENSG00000164318
GRIN1	glutamate receptor, ionotropic, N-methyl D-aspartate 1	ENSG00000176884	ENSG00000176884
SNAPIN	SNAP-associated protein	ENSG00000143553	ENSG00000143553
GRIN2D	glutamate receptor, ionotropic, N-methyl D-aspartate 2D	ENSG00000105464	ENSG00000105464
GABRE	gamma-aminobutyric acid (GABA) A receptor, epsilon	ENSG00000102287	ENSG00000102287
CACNB4	calcium channel, voltage-dependent, beta 4 subunit	ENSG00000182389	ENSG00000182389
SEPT3	septin 3	ENSG00000100167	ENSG00000100167
PLAT	plasminogen activator, tissue	ENSG00000104368	ENSG00000104368
GO:0005201	extracellular matrix structural constituent	F	3.437442e-04	5/75	28
PXDN	peroxidasin homolog (Drosophila)	ENSG00000130508	ENSG00000130508
COL11A2	collagen, type XI, alpha 2	ENSG00000235708	ENSG00000235708
COL6A2	collagen, type VI, alpha 2	ENSG00000142173	ENSG00000142173
MUC6	mucin 6, oligomeric mucus/gel-forming	ENSG00000184956	ENSG00000184956
LAMA4	laminin, alpha 4	ENSG00000112769	ENSG00000112769
GO:0001701	in utero embryonic development	P	3.854267e-04	10/256	29
MECOM	MDS1 and EVI1 complex locus	ENSG00000085276	ENSG00000085276
GATA3	GATA binding protein 3	ENSG00000107485	ENSG00000107485
AXIN1	axin 1	ENSG00000103126	ENSG00000103126
GLI3	GLI family zinc finger 3	ENSG00000106571	ENSG00000106571
SOX6	SRY (sex determining region Y)-box 6	ENSG00000110693	ENSG00000110693
FOXP1	forkhead box P1	ENSG00000114861	ENSG00000114861
ZFP42	ZFP42 zinc finger protein	ENSG00000179059	ENSG00000179059
FGFR2	fibroblast growth factor receptor 2	ENSG00000066468	ENSG00000066468
AR	androgen receptor	ENSG00000169083	ENSG00000169083
NOTCH1	notch 1	ENSG00000148400	ENSG00000148400
GO:0042391	regulation of membrane potential	P	4.250740e-04	5/78	30
GRIN1	glutamate receptor, ionotropic, N-methyl D-aspartate 1	ENSG00000176884	ENSG00000176884
CACNB4	calcium channel, voltage-dependent, beta 4 subunit	ENSG00000182389	ENSG00000182389
CNGA3	cyclic nucleotide gated channel alpha 3	ENSG00000144191	ENSG00000144191
KCNQ1	potassium voltage-gated channel, KQT-like subfamily, member 1	ENSG00000053918	ENSG00000053918
DPP6	dipeptidyl-peptidase 6	ENSG00000130226	ENSG00000130226
GO:0045893	positive regulation of transcription, DNA-dependent	P	4.258332e-04	17/586	31
SSBP3	single stranded DNA binding protein 3	ENSG00000157216	ENSG00000157216
MECOM	MDS1 and EVI1 complex locus	ENSG00000085276	ENSG00000085276
MLXIPL	MLX interacting protein-like	ENSG00000009950	ENSG00000009950
GATA3	GATA binding protein 3	ENSG00000107485	ENSG00000107485
AXIN1	axin 1	ENSG00000103126	ENSG00000103126
TP63	tumor protein p63	ENSG00000073282	ENSG00000073282
GLI3	GLI family zinc finger 3	ENSG00000106571	ENSG00000106571
SOX6	SRY (sex determining region Y)-box 6	ENSG00000110693	ENSG00000110693
FOXP1	forkhead box P1	ENSG00000114861	ENSG00000114861
SMARCD3	SWI/SNF related, matrix associated, actin dependent regulator of chromatin, subfamily d, member 3	ENSG00000082014	ENSG00000082014
NFYA	nuclear transcription factor Y, alpha	ENSG00000001167	ENSG00000001167
CHEK2	checkpoint kinase 2	ENSG00000183765	ENSG00000183765
RAN	RAN, member RAS oncogene family	ENSG00000132341	ENSG00000132341
AR	androgen receptor	ENSG00000169083	ENSG00000169083
MYOD1	myogenic differentiation 1	ENSG00000129152	ENSG00000129152
NOTCH1	notch 1	ENSG00000148400	ENSG00000148400
ZBTB17	zinc finger and BTB domain containing 17	ENSG00000116809	ENSG00000116809
GO:0005891	voltage-gated calcium channel complex	C	4.346137e-04	3/29	32
PDE4B	phosphodiesterase 4B, cAMP-specific	ENSG00000184588	ENSG00000184588
CACNB4	calcium channel, voltage-dependent, beta 4 subunit	ENSG00000182389	ENSG00000182389
CACNG7	calcium channel, voltage-dependent, gamma subunit 7	ENSG00000105605	ENSG00000105605
GO:0005249	voltage-gated potassium channel activity	F	5.050604e-04	4/53	33
KCNA4	potassium voltage-gated channel, shaker-related subfamily, member 4	ENSG00000182255	ENSG00000182255
CNGA3	cyclic nucleotide gated channel alpha 3	ENSG00000144191	ENSG00000144191
KCNB1	potassium voltage-gated channel, Shab-related subfamily, member 1	ENSG00000158445	ENSG00000158445
KCNQ1	potassium voltage-gated channel, KQT-like subfamily, member 1	ENSG00000053918	ENSG00000053918
GO:0030324	lung development	P	5.083189e-04	6/112	34
CUX1	cut-like homeobox 1	ENSG00000257923	ENSG00000257923
GLI3	GLI family zinc finger 3	ENSG00000106571	ENSG00000106571
FOXP1	forkhead box P1	ENSG00000114861	ENSG00000114861
FGFR2	fibroblast growth factor receptor 2	ENSG00000066468	ENSG00000066468
NOTCH1	notch 1	ENSG00000148400	ENSG00000148400
FGF1	fibroblast growth factor 1 (acidic)	ENSG00000113578	ENSG00000113578
GO:0042383	sarcolemma	C	5.206896e-04	5/81	35
SLC8A1	solute carrier family 8 (sodium/calcium exchanger), member 1	ENSG00000183023	ENSG00000183023
COL6A1	collagen, type VI, alpha 1	ENSG00000142156	ENSG00000142156
COL6A2	collagen, type VI, alpha 2	ENSG00000142173	ENSG00000142173
KCNQ1	potassium voltage-gated channel, KQT-like subfamily, member 1	ENSG00000053918	ENSG00000053918
KCNJ8	potassium inwardly-rectifying channel, subfamily J, member 8	ENSG00000121361	ENSG00000121361
GO:0045944	positive regulation of transcription from RNA polymerase II promoter	P	5.541722e-04	21/811	36
SSBP3	single stranded DNA binding protein 3	ENSG00000157216	ENSG00000157216
MECOM	MDS1 and EVI1 complex locus	ENSG00000085276	ENSG00000085276
MLXIPL	MLX interacting protein-like	ENSG00000009950	ENSG00000009950
GATA3	GATA binding protein 3	ENSG00000107485	ENSG00000107485
TP63	tumor protein p63	ENSG00000073282	ENSG00000073282
GRIN1	glutamate receptor, ionotropic, N-methyl D-aspartate 1	ENSG00000176884	ENSG00000176884
GLI3	GLI family zinc finger 3	ENSG00000106571	ENSG00000106571
NFIX	nuclear factor I/X (CCAAT-binding transcription factor)	ENSG00000008441	ENSG00000008441
SOX6	SRY (sex determining region Y)-box 6	ENSG00000110693	ENSG00000110693
FOXP1	forkhead box P1	ENSG00000114861	ENSG00000114861
NFYA	nuclear transcription factor Y, alpha	ENSG00000001167	ENSG00000001167
ZFPM1	zinc finger protein, FOG family member 1	ENSG00000179588	ENSG00000179588
FGFR2	fibroblast growth factor receptor 2	ENSG00000066468	ENSG00000066468
CBFA2T3	core-binding factor, runt domain, alpha subunit 2; translocated to, 3	ENSG00000129993	ENSG00000129993
AR	androgen receptor	ENSG00000169083	ENSG00000169083
MYOD1	myogenic differentiation 1	ENSG00000129152	ENSG00000129152
NOTCH1	notch 1	ENSG00000148400	ENSG00000148400
CBFA2T2	core-binding factor, runt domain, alpha subunit 2; translocated to, 2	ENSG00000078699	ENSG00000078699
DCAF6	DDB1 and CUL4 associated factor 6	ENSG00000143164	ENSG00000143164
FGF1	fibroblast growth factor 1 (acidic)	ENSG00000113578	ENSG00000113578
GDNF	glial cell derived neurotrophic factor	ENSG00000168621	ENSG00000168621
GO:0030054	cell junction	C	7.171784e-04	13/413	37
PVR	poliovirus receptor	ENSG00000073008	ENSG00000073008
EGFLAM	EGF-like, fibronectin type III and laminin G domains	ENSG00000164318	ENSG00000164318
GRIN1	glutamate receptor, ionotropic, N-methyl D-aspartate 1	ENSG00000176884	ENSG00000176884
LGI3	leucine-rich repeat LGI family, member 3	ENSG00000168481	ENSG00000168481
SNAPIN	SNAP-associated protein	ENSG00000143553	ENSG00000143553
GRIN2D	glutamate receptor, ionotropic, N-methyl D-aspartate 2D	ENSG00000105464	ENSG00000105464
GABRE	gamma-aminobutyric acid (GABA) A receptor, epsilon	ENSG00000102287	ENSG00000102287
SVIL	supervillin	ENSG00000197321	ENSG00000197321
PSD	pleckstrin and Sec7 domain containing	ENSG00000059915	ENSG00000059915
SEPT3	septin 3	ENSG00000100167	ENSG00000100167
ERC2	ELKS/RAB6-interacting/CAST family member 2	ENSG00000187672	ENSG00000187672
CDK5	cyclin-dependent kinase 5	ENSG00000164885	ENSG00000164885
CLDN19	claudin 19	ENSG00000164007	ENSG00000164007
GO:0009791	post-embryonic development	P	7.614993e-04	5/87	38
MECOM	MDS1 and EVI1 complex locus	ENSG00000085276	ENSG00000085276
SLC8A1	solute carrier family 8 (sodium/calcium exchanger), member 1	ENSG00000183023	ENSG00000183023
GATA3	GATA binding protein 3	ENSG00000107485	ENSG00000107485
SOX6	SRY (sex determining region Y)-box 6	ENSG00000110693	ENSG00000110693
FGFR2	fibroblast growth factor receptor 2	ENSG00000066468	ENSG00000066468
GO:0007507	heart development	P	9.330587e-04	8/200	39
NRG1	neuregulin 1	ENSG00000157168	ENSG00000157168
GLI3	GLI family zinc finger 3	ENSG00000106571	ENSG00000106571
TNNT2	troponin T type 2 (cardiac)	ENSG00000118194	ENSG00000118194
FOXP1	forkhead box P1	ENSG00000114861	ENSG00000114861
ZFPM1	zinc finger protein, FOG family member 1	ENSG00000179588	ENSG00000179588
NOTCH1	notch 1	ENSG00000148400	ENSG00000148400
GNA11	guanine nucleotide binding protein (G protein), alpha 11 (Gq class)	ENSG00000088256	ENSG00000088256
KCNJ8	potassium inwardly-rectifying channel, subfamily J, member 8	ENSG00000121361	ENSG00000121361
GO:0005102	receptor binding	F	9.666027e-04	12/378	40
NRG1	neuregulin 1	ENSG00000157168	ENSG00000157168
DHRS4	dehydrogenase/reductase (SDR family) member 4	ENSG00000157326	ENSG00000157326
AXIN1	axin 1	ENSG00000103126	ENSG00000103126
GRIN1	glutamate receptor, ionotropic, N-methyl D-aspartate 1	ENSG00000176884	ENSG00000176884
IL1RAPL1	interleukin 1 receptor accessory protein-like 1	ENSG00000169306	ENSG00000169306
SMARCD3	SWI/SNF related, matrix associated, actin dependent regulator of chromatin, subfamily d, member 3	ENSG00000082014	ENSG00000082014
LAMA4	laminin, alpha 4	ENSG00000112769	ENSG00000112769
AR	androgen receptor	ENSG00000169083	ENSG00000169083
CXCL12	chemokine (C-X-C motif) ligand 12	ENSG00000107562	ENSG00000107562
LBP	lipopolysaccharide binding protein	ENSG00000129988	ENSG00000129988
MTSS1	metastasis suppressor 1	ENSG00000170873	ENSG00000170873
GDNF	glial cell derived neurotrophic factor	ENSG00000168621	ENSG00000168621
GO:0005245	voltage-gated calcium channel activity	F	1.006775e-03	3/36	41
CACNB4	calcium channel, voltage-dependent, beta 4 subunit	ENSG00000182389	ENSG00000182389
IL1RAPL1	interleukin 1 receptor accessory protein-like 1	ENSG00000169306	ENSG00000169306
CACNG7	calcium channel, voltage-dependent, gamma subunit 7	ENSG00000105605	ENSG00000105605
GO:0030016	myofibril	C	1.365351e-03	3/39	42
TNNT2	troponin T type 2 (cardiac)	ENSG00000118194	ENSG00000118194
MYOD1	myogenic differentiation 1	ENSG00000129152	ENSG00000129152
KCNJ8	potassium inwardly-rectifying channel, subfamily J, member 8	ENSG00000121361	ENSG00000121361
GO:0008584	male gonad development	P	1.417146e-03	5/98	43
GATA3	GATA binding protein 3	ENSG00000107485	ENSG00000107485
ZFP42	ZFP42 zinc finger protein	ENSG00000179059	ENSG00000179059
KCNQ1	potassium voltage-gated channel, KQT-like subfamily, member 1	ENSG00000053918	ENSG00000053918
AR	androgen receptor	ENSG00000169083	ENSG00000169083
SPINK2	serine peptidase inhibitor, Kazal type 2 (acrosin-trypsin inhibitor)	ENSG00000128040	ENSG00000128040
GO:0006892	post-Golgi vesicle-mediated transport	P	1.648699e-03	3/41	44
PUM1	pumilio RNA-binding family member 1	ENSG00000134644	ENSG00000134644
AP3B2	adaptor-related protein complex 3, beta 2 subunit	ENSG00000103723	ENSG00000103723
GBF1	golgi brefeldin A resistant guanine nucleotide exchange factor 1	ENSG00000107862	ENSG00000107862
GO:0045599	negative regulation of fat cell differentiation	P	1.804631e-03	3/42	45
GATA3	GATA binding protein 3	ENSG00000107485	ENSG00000107485
AXIN1	axin 1	ENSG00000103126	ENSG00000103126
ZFPM1	zinc finger protein, FOG family member 1	ENSG00000179588	ENSG00000179588
GO:0005788	endoplasmic reticulum lumen	C	1.986144e-03	7/181	46
COL11A2	collagen, type XI, alpha 2	ENSG00000235708	ENSG00000235708
COL6A1	collagen, type VI, alpha 1	ENSG00000142156	ENSG00000142156
COL6A2	collagen, type VI, alpha 2	ENSG00000142173	ENSG00000142173
ERP29	endoplasmic reticulum protein 29	ENSG00000089248	ENSG00000089248
COL23A1	collagen, type XXIII, alpha 1	ENSG00000050767	ENSG00000050767
PTPRN2	protein tyrosine phosphatase, receptor type, N polypeptide 2	ENSG00000155093	ENSG00000155093
GBF1	golgi brefeldin A resistant guanine nucleotide exchange factor 1	ENSG00000107862	ENSG00000107862
GO:0008076	voltage-gated potassium channel complex	C	2.033519e-03	4/72	47
KCNA4	potassium voltage-gated channel, shaker-related subfamily, member 4	ENSG00000182255	ENSG00000182255
KCNB1	potassium voltage-gated channel, Shab-related subfamily, member 1	ENSG00000158445	ENSG00000158445
KCNQ1	potassium voltage-gated channel, KQT-like subfamily, member 1	ENSG00000053918	ENSG00000053918
KCNJ8	potassium inwardly-rectifying channel, subfamily J, member 8	ENSG00000121361	ENSG00000121361
GO:0007420	brain development	P	2.104187e-03	8/225	48
ZFHX3	zinc finger homeobox 3	ENSG00000140836	ENSG00000140836
CDH22	cadherin 22, type 2	ENSG00000149654	ENSG00000149654
GLI3	GLI family zinc finger 3	ENSG00000106571	ENSG00000106571
EXT1	exostosin glycosyltransferase 1	ENSG00000182197	ENSG00000182197
DPYSL2	dihydropyrimidinase-like 2	ENSG00000092964	ENSG00000092964
SEPT4	septin 4	ENSG00000108387	ENSG00000108387
CXCL12	chemokine (C-X-C motif) ligand 12	ENSG00000107562	ENSG00000107562
LMX1A	LIM homeobox transcription factor 1, alpha	ENSG00000162761	ENSG00000162761
GO:0000122	negative regulation of transcription from RNA polymerase II promoter	P	2.182130e-03	16/623	49
ZFHX3	zinc finger homeobox 3	ENSG00000140836	ENSG00000140836
MLXIPL	MLX interacting protein-like	ENSG00000009950	ENSG00000009950
CUX1	cut-like homeobox 1	ENSG00000257923	ENSG00000257923
GATA3	GATA binding protein 3	ENSG00000107485	ENSG00000107485
TP63	tumor protein p63	ENSG00000073282	ENSG00000073282
GLI3	GLI family zinc finger 3	ENSG00000106571	ENSG00000106571
NFIX	nuclear factor I/X (CCAAT-binding transcription factor)	ENSG00000008441	ENSG00000008441
SOX6	SRY (sex determining region Y)-box 6	ENSG00000110693	ENSG00000110693
PRRX1	paired related homeobox 1	ENSG00000116132	ENSG00000116132
FGFR2	fibroblast growth factor receptor 2	ENSG00000066468	ENSG00000066468
TRIM29	tripartite motif containing 29	ENSG00000137699	ENSG00000137699
NOTCH1	notch 1	ENSG00000148400	ENSG00000148400
MDFI	MyoD family inhibitor	ENSG00000112559	ENSG00000112559
MKX	mohawk homeobox	ENSG00000150051	ENSG00000150051
KANK2	KN motif and ankyrin repeat domains 2	ENSG00000197256	ENSG00000197256
RUNX3	runt-related transcription factor 3	ENSG00000020633	ENSG00000020633
GO:0007188	G-protein signaling, coupled to cAMP nucleotide second messenger	P	2.333289e-03	3/45	50
GNAO1	guanine nucleotide binding protein (G protein), alpha activating activity polypeptide O	ENSG00000087258	ENSG00000087258
GNA11	guanine nucleotide binding protein (G protein), alpha 11 (Gq class)	ENSG00000088256	ENSG00000088256
ADRA1D	adrenoceptor alpha 1D	ENSG00000171873	ENSG00000171873
GO:0006816	calcium ion transport	P	2.434730e-03	5/109	51
SLC8A1	solute carrier family 8 (sodium/calcium exchanger), member 1	ENSG00000183023	ENSG00000183023
GRIN1	glutamate receptor, ionotropic, N-methyl D-aspartate 1	ENSG00000176884	ENSG00000176884
CACNB4	calcium channel, voltage-dependent, beta 4 subunit	ENSG00000182389	ENSG00000182389
TRPM8	transient receptor potential cation channel, subfamily M, member 8	ENSG00000144481	ENSG00000144481
CACNG7	calcium channel, voltage-dependent, gamma subunit 7	ENSG00000105605	ENSG00000105605
GO:0001657	ureteric bud development	P	2.530845e-03	3/46	52
BMPER	BMP binding endothelial regulator	ENSG00000164619	ENSG00000164619
FGFR2	fibroblast growth factor receptor 2	ENSG00000066468	ENSG00000066468
GDNF	glial cell derived neurotrophic factor	ENSG00000168621	ENSG00000168621
GO:0030574	collagen catabolic process	P	2.888974e-03	4/78	53
COL11A2	collagen, type XI, alpha 2	ENSG00000235708	ENSG00000235708
COL6A1	collagen, type VI, alpha 1	ENSG00000142156	ENSG00000142156
COL6A2	collagen, type VI, alpha 2	ENSG00000142173	ENSG00000142173
COL23A1	collagen, type XXIII, alpha 1	ENSG00000050767	ENSG00000050767

## Sheet: Table S11a
Enriched KEGG Pathways and Genes resulting from GORevenge based Selection of CpG sites
Term/Gene Name	Annotation/Gene Description	Category/GeneID	P-value	Enrichment	Rank
path:hsa05205	Proteoglycans in cancer - Homo sapiens (human)		1.372902e-12	24/222	1
KDR	kinase insert domain receptor (a type III receptor tyrosine kinase)
RPS6	ribosomal protein S6
PLCG1	phospholipase C, gamma 1
VAV2	vav 2 guanine nucleotide exchange factor
ITPR1	inositol 1,4,5-trisphosphate receptor, type 1
FZD4	frizzled family receptor 4
FGFR1	fibroblast growth factor receptor 1
PRKCB	protein kinase C, beta
BRAF	v-raf murine sarcoma viral oncogene homolog B1
TGFB2	transforming growth factor, beta 2
ERBB3	v-erb-b2 erythroblastic leukemia viral oncogene homolog 3 (avian)
PTK2	PTK2 protein tyrosine kinase 2
SDC1	syndecan 1
PRKACB	protein kinase, cAMP-dependent, catalytic, beta
WNT7A	wingless-type MMTV integration site family, member 7A
IGF1R	insulin-like growth factor 1 receptor
WNT16	wingless-type MMTV integration site family, member 16
WNT7B	wingless-type MMTV integration site family, member 7B
WNT4	wingless-type MMTV integration site family, member 4
FZD10	frizzled family receptor 10
PLCG2	phospholipase C, gamma 2 (phosphatidylinositol-specific)
AKT1	v-akt murine thymoma viral oncogene homolog 1
FGF1	fibroblast growth factor 1 (acidic)
GRB2	growth factor receptor-bound protein 2
path:hsa05215	Prostate cancer - Homo sapiens (human)		2.581602e-12	17/88	2
CREBBP	CREB binding protein
AR	androgen receptor
PDGFRA	platelet-derived growth factor receptor, alpha polypeptide
CDKN1B	cyclin-dependent kinase inhibitor 1B (p27, Kip1)
FGFR1	fibroblast growth factor receptor 1
INS	insulin
BRAF	v-raf murine sarcoma viral oncogene homolog B1
FGFR2	fibroblast growth factor receptor 2
PDGFRB	platelet-derived growth factor receptor, beta polypeptide
ATF4	activating transcription factor 4 (tax-responsive enhancer element B67)
FOXO1	forkhead box O1
IGF1R	insulin-like growth factor 1 receptor
TCF7L2	transcription factor 7-like 2 (T-cell specific, HMG-box)
NFKBIA	nuclear factor of kappa light polypeptide gene enhancer in B-cells inhibitor, alpha
IKBKB	inhibitor of kappa light polypeptide gene enhancer in B-cells, kinase beta
AKT1	v-akt murine thymoma viral oncogene homolog 1
GRB2	growth factor receptor-bound protein 2
path:hsa04390	Hippo signaling pathway - Homo sapiens (human)		5.863310e-12	20/154	3
TP73	tumor protein p73
AXIN1	axin 1
SMAD1	SMAD family member 1
CDH1	cadherin 1, type 1, E-cadherin (epithelial)
FZD4	frizzled family receptor 4
PRKCZ	protein kinase C, zeta
BMPR1A	bone morphogenetic protein receptor, type IA
TGFB2	transforming growth factor, beta 2
ID3	inhibitor of DNA binding 3, dominant negative helix-loop-helix protein
GLI2	GLI family zinc finger 2
WNT7A	wingless-type MMTV integration site family, member 7A
WNT16	wingless-type MMTV integration site family, member 16
WNT7B	wingless-type MMTV integration site family, member 7B
TCF7L2	transcription factor 7-like 2 (T-cell specific, HMG-box)
WNT4	wingless-type MMTV integration site family, member 4
FZD10	frizzled family receptor 10
FGF1	fibroblast growth factor 1 (acidic)
SMAD3	SMAD family member 3
BMP6	bone morphogenetic protein 6
BMP7	bone morphogenetic protein 7
path:hsa04910	Insulin signaling pathway - Homo sapiens (human)		9.916290e-12	20/136	4
PYGM	phosphorylase, glycogen, muscle
RPS6	ribosomal protein S6
PRKAR2B	protein kinase, cAMP-dependent, regulatory, type II, beta
FBP1	fructose-1,6-bisphosphatase 1
FASN	fatty acid synthase
PYGL	phosphorylase, glycogen, liver
PTPRF	protein tyrosine phosphatase, receptor type, F
PRKAG2	protein kinase, AMP-activated, gamma 2 non-catalytic subunit
INS	insulin
PRKCZ	protein kinase C, zeta
MAPK10	mitogen-activated protein kinase 10
BRAF	v-raf murine sarcoma viral oncogene homolog B1
PRKACB	protein kinase, cAMP-dependent, catalytic, beta
FOXO1	forkhead box O1
PCK1	phosphoenolpyruvate carboxykinase 1 (soluble)
INSR	insulin receptor
IKBKB	inhibitor of kappa light polypeptide gene enhancer in B-cells, kinase beta
AKT1	v-akt murine thymoma viral oncogene homolog 1
PRKAR1B	protein kinase, cAMP-dependent, regulatory, type I, beta
GRB2	growth factor receptor-bound protein 2
path:hsa05200	Pathways in cancer - Homo sapiens (human)		2.395506e-11	44/326	5
CEBPA	CCAAT/enhancer binding protein (C/EBP), alpha
CREBBP	CREB binding protein
CDK6	cyclin-dependent kinase 6
PLCG1	phospholipase C, gamma 1
AXIN1	axin 1
KITLG	KIT ligand
RAD51	RAD51 homolog (S. cerevisiae)
AR	androgen receptor
EGLN1	egl nine homolog 1 (C. elegans)
PDGFRA	platelet-derived growth factor receptor, alpha polypeptide
CDH1	cadherin 1, type 1, E-cadherin (epithelial)
CDKN1B	cyclin-dependent kinase inhibitor 1B (p27, Kip1)
FZD4	frizzled family receptor 4
FGFR1	fibroblast growth factor receptor 1
PRKCB	protein kinase C, beta
MAPK10	mitogen-activated protein kinase 10
LAMA5	laminin, alpha 5
BRAF	v-raf murine sarcoma viral oncogene homolog B1
TGFB2	transforming growth factor, beta 2
GLI3	GLI family zinc finger 3
RXRG	retinoid X receptor, gamma
PTK2	PTK2 protein tyrosine kinase 2
FGFR2	fibroblast growth factor receptor 2
STK4	serine/threonine kinase 4
GLI2	GLI family zinc finger 2
PDGFRB	platelet-derived growth factor receptor, beta polypeptide
NTRK1	neurotrophic tyrosine kinase, receptor, type 1
WNT7A	wingless-type MMTV integration site family, member 7A
FOXO1	forkhead box O1
IGF1R	insulin-like growth factor 1 receptor
WNT16	wingless-type MMTV integration site family, member 16
WNT7B	wingless-type MMTV integration site family, member 7B
TCF7L2	transcription factor 7-like 2 (T-cell specific, HMG-box)
WNT4	wingless-type MMTV integration site family, member 4
NFKBIA	nuclear factor of kappa light polypeptide gene enhancer in B-cells inhibitor, alpha
FZD10	frizzled family receptor 10
IKBKB	inhibitor of kappa light polypeptide gene enhancer in B-cells, kinase beta
PLCG2	phospholipase C, gamma 2 (phosphatidylinositol-specific)
RARA	retinoic acid receptor, alpha
AKT1	v-akt murine thymoma viral oncogene homolog 1
FGF1	fibroblast growth factor 1 (acidic)
SMAD3	SMAD family member 3
GRB2	growth factor receptor-bound protein 2
SHH	sonic hedgehog
path:hsa05166	HTLV-I infection - Homo sapiens (human)		3.521450e-11	25/263	6
CREBBP	CREB binding protein
NRP1	neuropilin 1
PDGFRA	platelet-derived growth factor receptor, alpha polypeptide
FZD4	frizzled family receptor 4
MAPK10	mitogen-activated protein kinase 10
TGFB2	transforming growth factor, beta 2
ATM	ataxia telangiectasia mutated
CD3E	CD3e molecule, epsilon (CD3-TCR complex)
ADCY3	adenylate cyclase 3
RAN	RAN, member RAS oncogene family
PDGFRB	platelet-derived growth factor receptor, beta polypeptide
PRKACB	protein kinase, cAMP-dependent, catalytic, beta
ATF4	activating transcription factor 4 (tax-responsive enhancer element B67)
WNT7A	wingless-type MMTV integration site family, member 7A
WNT16	wingless-type MMTV integration site family, member 16
WNT7B	wingless-type MMTV integration site family, member 7B
WNT4	wingless-type MMTV integration site family, member 4
NFKBIA	nuclear factor of kappa light polypeptide gene enhancer in B-cells inhibitor, alpha
FZD10	frizzled family receptor 10
IKBKB	inhibitor of kappa light polypeptide gene enhancer in B-cells, kinase beta
MAP3K3	mitogen-activated protein kinase kinase kinase 3
AKT1	v-akt murine thymoma viral oncogene homolog 1
SMAD3	SMAD family member 3
MSX1	msh homeobox 1
ADCY5	adenylate cyclase 5
path:hsa04020	Calcium signaling pathway - Homo sapiens (human)		4.528666e-11	25/181	7
SLC8A1	solute carrier family 8 (sodium/calcium exchanger), member 1
PLCG1	phospholipase C, gamma 1
MYLK	myosin light chain kinase
DRD5	dopamine receptor D5
RYR2	ryanodine receptor 2 (cardiac)
ITPR1	inositol 1,4,5-trisphosphate receptor, type 1
AVPR1A	arginine vasopressin receptor 1A
PDGFRA	platelet-derived growth factor receptor, alpha polypeptide
PRKCB	protein kinase C, beta
HTR2C	5-hydroxytryptamine (serotonin) receptor 2C, G protein-coupled
NOS1	nitric oxide synthase 1 (neuronal)
ERBB3	v-erb-b2 erythroblastic leukemia viral oncogene homolog 3 (avian)
GRIN2A	glutamate receptor, ionotropic, N-methyl D-aspartate 2A
GRIN1	glutamate receptor, ionotropic, N-methyl D-aspartate 1
GRIN2D	glutamate receptor, ionotropic, N-methyl D-aspartate 2D
ADCY3	adenylate cyclase 3
ADRA1A	adrenergic, alpha-1A-, receptor
PDGFRB	platelet-derived growth factor receptor, beta polypeptide
PRKACB	protein kinase, cAMP-dependent, catalytic, beta
EDNRA	endothelin receptor type A
EDNRB	endothelin receptor type B
PLCG2	phospholipase C, gamma 2 (phosphatidylinositol-specific)
LHCGR	luteinizing hormone/choriogonadotropin receptor
SPHK2	sphingosine kinase 2
ADRB3	adrenergic, beta-3-, receptor
path:hsa04916	Melanogenesis - Homo sapiens (human)		5.736434e-11	15/99	8
CREBBP	CREB binding protein
KITLG	KIT ligand
FZD4	frizzled family receptor 4
PRKCB	protein kinase C, beta
GNAO1	guanine nucleotide binding protein (G protein), alpha activating activity polypeptide O
ADCY3	adenylate cyclase 3
PRKACB	protein kinase, cAMP-dependent, catalytic, beta
WNT7A	wingless-type MMTV integration site family, member 7A
EDNRB	endothelin receptor type B
WNT16	wingless-type MMTV integration site family, member 16
WNT7B	wingless-type MMTV integration site family, member 7B
TCF7L2	transcription factor 7-like 2 (T-cell specific, HMG-box)
WNT4	wingless-type MMTV integration site family, member 4
FZD10	frizzled family receptor 10
ADCY5	adenylate cyclase 5
path:hsa04010	MAPK signaling pathway - Homo sapiens (human)		6.985945e-11	27/257	9
MEF2C	myocyte enhancer factor 2C
BDNF	brain-derived neurotrophic factor
DUSP6	dual specificity phosphatase 6
NTF3	neurotrophin 3
PDGFRA	platelet-derived growth factor receptor, alpha polypeptide
FGFR1	fibroblast growth factor receptor 1
PRKCB	protein kinase C, beta
MAPK10	mitogen-activated protein kinase 10
AC217779.2	microtubule-associated protein tau isoform 5
BRAF	v-raf murine sarcoma viral oncogene homolog B1
TGFB2	transforming growth factor, beta 2
RASGRF1	Ras protein-specific guanine nucleotide-releasing factor 1
FGFR2	fibroblast growth factor receptor 2
STK4	serine/threonine kinase 4
CACNB4	calcium channel, voltage-dependent, beta 4 subunit
RPS6KA2	ribosomal protein S6 kinase, 90kDa, polypeptide 2
PDGFRB	platelet-derived growth factor receptor, beta polypeptide
PRKACB	protein kinase, cAMP-dependent, catalytic, beta
ATF4	activating transcription factor 4 (tax-responsive enhancer element B67)
NTRK1	neurotrophic tyrosine kinase, receptor, type 1
PAK2	p21 protein (Cdc42/Rac)-activated kinase 2
FGFR4	fibroblast growth factor receptor 4
IKBKB	inhibitor of kappa light polypeptide gene enhancer in B-cells, kinase beta
MAP3K3	mitogen-activated protein kinase kinase kinase 3
AKT1	v-akt murine thymoma viral oncogene homolog 1
FGF1	fibroblast growth factor 1 (acidic)
GRB2	growth factor receptor-bound protein 2
path:hsa04722	Neurotrophin signaling pathway - Homo sapiens (human)		1.186253e-10	16/118	10
TP73	tumor protein p73
PLCG1	phospholipase C, gamma 1
BDNF	brain-derived neurotrophic factor
NTF3	neurotrophin 3
MAPK10	mitogen-activated protein kinase 10
BRAF	v-raf murine sarcoma viral oncogene homolog B1
RPS6KA2	ribosomal protein S6 kinase, 90kDa, polypeptide 2
ATF4	activating transcription factor 4 (tax-responsive enhancer element B67)
NTRK1	neurotrophic tyrosine kinase, receptor, type 1
NFKBIA	nuclear factor of kappa light polypeptide gene enhancer in B-cells inhibitor, alpha
IRAK2	interleukin-1 receptor-associated kinase 2
IKBKB	inhibitor of kappa light polypeptide gene enhancer in B-cells, kinase beta
PLCG2	phospholipase C, gamma 2 (phosphatidylinositol-specific)
MAP3K3	mitogen-activated protein kinase kinase kinase 3
AKT1	v-akt murine thymoma viral oncogene homolog 1
GRB2	growth factor receptor-bound protein 2
path:hsa04151	PI3K-Akt signaling pathway - Homo sapiens (human)		1.221162e-10	27/341	11
KDR	kinase insert domain receptor (a type III receptor tyrosine kinase)
RPS6	ribosomal protein S6
CDK6	cyclin-dependent kinase 6
KITLG	KIT ligand
BCL2L11	BCL2-like 11 (apoptosis facilitator)
PDGFRA	platelet-derived growth factor receptor, alpha polypeptide
CDKN1B	cyclin-dependent kinase inhibitor 1B (p27, Kip1)
FGFR1	fibroblast growth factor receptor 1
INS	insulin
PRKCZ	protein kinase C, zeta
LAMA5	laminin, alpha 5
IL4	interleukin 4
PKN1	protein kinase N1
PTK2	PTK2 protein tyrosine kinase 2
FGFR2	fibroblast growth factor receptor 2
PDGFRB	platelet-derived growth factor receptor, beta polypeptide
OSM	oncostatin M
ATF4	activating transcription factor 4 (tax-responsive enhancer element B67)
IGF1R	insulin-like growth factor 1 receptor
PCK1	phosphoenolpyruvate carboxykinase 1 (soluble)
FGFR4	fibroblast growth factor receptor 4
RELN	reelin
INSR	insulin receptor
IKBKB	inhibitor of kappa light polypeptide gene enhancer in B-cells, kinase beta
AKT1	v-akt murine thymoma viral oncogene homolog 1
FGF1	fibroblast growth factor 1 (acidic)
GRB2	growth factor receptor-bound protein 2
path:hsa04310	Wnt signaling pathway - Homo sapiens (human)		2.822345e-10	17/143	12
CREBBP	CREB binding protein
AXIN1	axin 1
FZD4	frizzled family receptor 4
PRKCB	protein kinase C, beta
MAPK10	mitogen-activated protein kinase 10
SFRP1	secreted frizzled-related protein 1
SFRP4	secreted frizzled-related protein 4
PRKACB	protein kinase, cAMP-dependent, catalytic, beta
WNT7A	wingless-type MMTV integration site family, member 7A
LRP5	low density lipoprotein receptor-related protein 5
WNT16	wingless-type MMTV integration site family, member 16
WNT7B	wingless-type MMTV integration site family, member 7B
TCF7L2	transcription factor 7-like 2 (T-cell specific, HMG-box)
WNT4	wingless-type MMTV integration site family, member 4
FZD10	frizzled family receptor 10
SMAD3	SMAD family member 3
TBL1XR1	transducin (beta)-like 1 X-linked receptor 1
path:hsa05217	Basal cell carcinoma - Homo sapiens (human)		3.930466e-10	11/55	13
AXIN1	axin 1
FZD4	frizzled family receptor 4
GLI3	GLI family zinc finger 3
GLI2	GLI family zinc finger 2
WNT7A	wingless-type MMTV integration site family, member 7A
WNT16	wingless-type MMTV integration site family, member 16
WNT7B	wingless-type MMTV integration site family, member 7B
TCF7L2	transcription factor 7-like 2 (T-cell specific, HMG-box)
WNT4	wingless-type MMTV integration site family, member 4
FZD10	frizzled family receptor 10
SHH	sonic hedgehog
path:hsa04510	Focal adhesion - Homo sapiens (human)		3.977830e-10	20/204	14
KDR	kinase insert domain receptor (a type III receptor tyrosine kinase)
MYLK	myosin light chain kinase
VAV2	vav 2 guanine nucleotide exchange factor
PDGFRA	platelet-derived growth factor receptor, alpha polypeptide
FYN	FYN oncogene related to SRC, FGR, YES
PRKCB	protein kinase C, beta
MAPK10	mitogen-activated protein kinase 10
LAMA5	laminin, alpha 5
BRAF	v-raf murine sarcoma viral oncogene homolog B1
RASGRF1	Ras protein-specific guanine nucleotide-releasing factor 1
VAV3	vav 3 guanine nucleotide exchange factor
PTK2	PTK2 protein tyrosine kinase 2
PDGFRB	platelet-derived growth factor receptor, beta polypeptide
ACTN4	actinin, alpha 4
IGF1R	insulin-like growth factor 1 receptor
PAK2	p21 protein (Cdc42/Rac)-activated kinase 2
RELN	reelin
AKT1	v-akt murine thymoma viral oncogene homolog 1
BCAR1	breast cancer anti-estrogen resistance 1
GRB2	growth factor receptor-bound protein 2
path:hsa04350	TGF-beta signaling pathway - Homo sapiens (human)		4.188302e-10	13/81	15
CREBBP	CREB binding protein
ACVR1C	activin A receptor, type IC
SMAD1	SMAD family member 1
INHBA	inhibin, beta A
NODAL	nodal homolog (mouse)
BMPR1A	bone morphogenetic protein receptor, type IA
TGFB2	transforming growth factor, beta 2
SMAD6	SMAD family member 6
AMHR2	anti-Mullerian hormone receptor, type II
ID3	inhibitor of DNA binding 3, dominant negative helix-loop-helix protein
SMAD3	SMAD family member 3
BMP6	bone morphogenetic protein 6
BMP7	bone morphogenetic protein 7
path:hsa05202	Transcriptional misregulation in cancer - Homo sapiens (human)		4.787186e-10	18/165	16
CEBPA	CCAAT/enhancer binding protein (C/EBP), alpha
PLAT	plasminogen activator, tissue
SMAD1	SMAD family member 1
MEF2C	myocyte enhancer factor 2C
HOXA11	homeobox A11
DUSP6	dual specificity phosphatase 6
CDKN1B	cyclin-dependent kinase inhibitor 1B (p27, Kip1)
RXRG	retinoid X receptor, gamma
PTK2	PTK2 protein tyrosine kinase 2
ATM	ataxia telangiectasia mutated
NTRK1	neurotrophic tyrosine kinase, receptor, type 1
FOXO1	forkhead box O1
IGF1R	insulin-like growth factor 1 receptor
WNT16	wingless-type MMTV integration site family, member 16
PBX1	pre-B-cell leukemia homeobox 1
BCL6	B-cell CLL/lymphoma 6
RARA	retinoic acid receptor, alpha
WT1	Wilms tumor 1
path:hsa00053	Ascorbate and aldarate metabolism - Homo sapiens (human)		7.528235e-10	8/26	17
UGT1A10	UDP glucuronosyltransferase 1 family, polypeptide A10
UGT1A4	UDP glucuronosyltransferase 1 family, polypeptide A4
UGT1A7	UDP glucuronosyltransferase 1 family, polypeptide A7
UGT1A5	UDP glucuronosyltransferase 1 family, polypeptide A5
UGT1A9	UDP glucuronosyltransferase 1 family, polypeptide A9
UGT1A3	UDP glucuronosyltransferase 1 family, polypeptide A3
ALDH9A1	aldehyde dehydrogenase 9 family, member A1
UGT1A6	UDP glucuronosyltransferase 1 family, polypeptide A6
path:hsa05030	Cocaine addiction - Homo sapiens (human)		2.117660e-09	10/50	18
CDK5	cyclin-dependent kinase 5
BDNF	brain-derived neurotrophic factor
GRIN2A	glutamate receptor, ionotropic, N-methyl D-aspartate 2A
GRIN1	glutamate receptor, ionotropic, N-methyl D-aspartate 1
GRIN2D	glutamate receptor, ionotropic, N-methyl D-aspartate 2D
PRKACB	protein kinase, cAMP-dependent, catalytic, beta
ATF4	activating transcription factor 4 (tax-responsive enhancer element B67)
DRD2	dopamine receptor D2
TH	tyrosine hydroxylase
ADCY5	adenylate cyclase 5
path:hsa00500	Starch and sucrose metabolism - Homo sapiens (human)		3.304690e-09	10/52	19
PYGM	phosphorylase, glycogen, muscle
ENPP1	ectonucleotide pyrophosphatase/phosphodiesterase 1
UGT1A10	UDP glucuronosyltransferase 1 family, polypeptide A10
UGT1A4	UDP glucuronosyltransferase 1 family, polypeptide A4
PYGL	phosphorylase, glycogen, liver
UGT1A7	UDP glucuronosyltransferase 1 family, polypeptide A7
UGT1A5	UDP glucuronosyltransferase 1 family, polypeptide A5
UGT1A9	UDP glucuronosyltransferase 1 family, polypeptide A9
UGT1A3	UDP glucuronosyltransferase 1 family, polypeptide A3
UGT1A6	UDP glucuronosyltransferase 1 family, polypeptide A6

## Sheet: Table S11b
Enriched KEGG pathways and Genes resulting from Evolutionary Selection of CpG sites
Term/Gene Name	Annotation/Gene Description	Category/GeneID	P-value	Enrichment	Rank
path:hsa04260	Cardiac muscle contraction - Homo sapiens (human)		9.813769e-05	6/76	1
CACNA2D4	calcium channel, voltage-dependent, alpha 2/delta subunit 4
SLC8A1	solute carrier family 8 (sodium/calcium exchanger), member 1
FXYD2	FXYD domain containing ion transport regulator 2
CACNB4	calcium channel, voltage-dependent, beta 4 subunit
CACNG7	calcium channel, voltage-dependent, gamma subunit 7
TNNT2	troponin T type 2 (cardiac)
path:hsa04974	Protein digestion and absorption - Homo sapiens (human)		2.299826e-04	6/87	2
SLC8A1	solute carrier family 8 (sodium/calcium exchanger), member 1
FXYD2	FXYD domain containing ion transport regulator 2
COL6A2	collagen, type VI, alpha 2
KCNQ1	potassium voltage-gated channel, KQT-like subfamily, member 1
COL6A1	collagen, type VI, alpha 1
COL11A2	collagen, type XI, alpha 2
path:hsa05410	Hypertrophic cardiomyopathy (HCM) - Homo sapiens (human)		1.285526e-03	5/85	3
CACNA2D4	calcium channel, voltage-dependent, alpha 2/delta subunit 4
SLC8A1	solute carrier family 8 (sodium/calcium exchanger), member 1
CACNB4	calcium channel, voltage-dependent, beta 4 subunit
CACNG7	calcium channel, voltage-dependent, gamma subunit 7
TNNT2	troponin T type 2 (cardiac)
path:hsa05414	Dilated cardiomyopathy - Homo sapiens (human)		1.726281e-03	5/90	4
CACNA2D4	calcium channel, voltage-dependent, alpha 2/delta subunit 4
SLC8A1	solute carrier family 8 (sodium/calcium exchanger), member 1
CACNB4	calcium channel, voltage-dependent, beta 4 subunit
CACNG7	calcium channel, voltage-dependent, gamma subunit 7
TNNT2	troponin T type 2 (cardiac)
path:hsa00061	Fatty acid biosynthesis - Homo sapiens (human)		2.865297e-03	1/6	5
MCAT	malonyl CoA:ACP acyltransferase (mitochondrial)	27349	27349
path:hsa05412	Arrhythmogenic right ventricular cardiomyopathy (ARVC) - Homo sapiens (human)		3.705446e-03	4/73	6
CACNA2D4	calcium channel, voltage-dependent, alpha 2/delta subunit 4
SLC8A1	solute carrier family 8 (sodium/calcium exchanger), member 1
CACNB4	calcium channel, voltage-dependent, beta 4 subunit
CACNG7	calcium channel, voltage-dependent, gamma subunit 7
path:hsa00460	Cyanoamino acid metabolism - Homo sapiens (human)		3.974132e-03	1/7	7
GBA3	glucosidase, beta, acid 3 (cytosolic)
path:hsa04961	Endocrine and other factor-regulated calcium reabsorption - Homo sapiens (human)		4.988808e-03	3/49	8
SLC8A1	solute carrier family 8 (sodium/calcium exchanger), member 1
FXYD2	FXYD domain containing ion transport regulator 2
AP2A1	adaptor-related protein complex 2, alpha 1 subunit
path:hsa05030	Cocaine addiction - Homo sapiens (human)		5.363533e-03	3/50	9
CDK5	cyclin-dependent kinase 5
GRIN1	glutamate receptor, ionotropic, N-methyl D-aspartate 1
GRIN2D	glutamate receptor, ionotropic, N-methyl D-aspartate 2D
path:hsa04512	ECM-receptor interaction - Homo sapiens (human)		7.414605e-03	4/86	10
COL6A2	collagen, type VI, alpha 2
LAMA4	laminin, alpha 4
COL6A1	collagen, type VI, alpha 1
COL11A2	collagen, type XI, alpha 2
path:hsa04730	Long-term depression - Homo sapiens (human)		0.01	3/60	11
PRKG1	protein kinase, cGMP-dependent, type I
GNA11	guanine nucleotide binding protein (G protein), alpha 11 (Gq class)
GNAO1	guanine nucleotide binding protein (G protein), alpha activating activity polypeptide O
